# Supplementary material for: Insecticides may facilitate the escape of weeds from biological control
Source: PeerJ. 2025 Jan 13;13:e18597. doi: 10.7717/peerj.18597 (PMC11737330; doi:10.7717/peerj.18597)
Supplement: Supplemental Information 2 [file peerj-13-18597-s002.xlsx]

## Sheet: Sheet1
Year	Date	Plot_ID	Block	Plot	Field	Weeds_g	Cover.crop_g	Total biomass_g	area cover_m2
2017	2017-06-17	101N	1	1	N	2.25	10.18	12.43	0.086475
2017	2017-06-17	102N	1	2	N	0.17	13.45	13.62	0.118
2017	2017-06-17	103N	1	3	N	0.85		0.85	0.002735
2017	2017-06-17	104N	1	4	N	2.83		2.83	0.017165
2017	2017-06-17	105N	1	5	N	1.4		1.4	0.004445
2017	2017-06-17	106N	1	6	N	2.99	17.62	20.61	0.13268
2017	2017-06-17	201N	2	1	N	1.37		1.37	0.00336
2017	2017-06-17	202N	2	2	N				0.00409
2017	2017-06-17	203N	2	3	N	0.08	13.15	13.23	0.056715
2017	2017-06-17	204N	2	4	N	0.22		0.22	0.00223
2017	2017-06-17	205N	2	5	N	0.32	11.15	11.47	0.07326
2017	2017-06-17	206N	2	6	N	1.3	12.92	14.22	0.0887125
2017	2017-06-17	301N	3	1	N	0.56		0.56	0.0008825
2017	2017-06-17	302N	3	2	N	3.24		3.24	0.0117525
2017	2017-06-17	303N	3	3	N	0.09	14.22	14.31	0.0697475
2017	2017-06-17	304N	3	4	N	3.31	14.38	17.69	0.0851275
2017	2017-06-17	305N	3	5	N	13.84	12.51	26.35	0.125348
2017	2017-06-17	306N	3	6	N	54.27		54.27	0.05641
2017	2017-06-17	401N	4	1	N	11.34	12.46	23.8	0.10712
2017	2017-06-17	402N	4	2	N	4.88		4.88	0.022825
2017	2017-06-17	403N	4	3	N	3	11.63	14.63	0.0995625
2017	2017-06-17	404N	4	4	N	5.29		5.29	0.0204775
2017	2017-06-17	405N	4	5	N	7.02		7.02	0.0287
2017	2017-06-17	406N	4	6	N	4.5	15.75	20.25	0.13988
2017	2017-06-17	501N	5	1	N	26.35		26.35	0.0549775
2017	2017-06-17	502N	5	2	N		13.65		0.0947575
2017	2017-06-17	503N	5	3	N	5.49		5.49	0.016295
2017	2017-06-17	504N	5	4	N		14.81		0.111653
2017	2017-06-17	505N	5	5	N	0.54	14.61	15.15	0.124308
2017	2017-06-17	506N	5	6	N	16.02		16.02	0.050045
2017	2017-06-17	601N	6	1	N	9.46	12.6	22.06	0.0805625
2017	2017-06-17	602N	6	2	N	2.11	11.63	13.74	0.0738675
2017	2017-06-17	603N	6	3	N	12.02		12.02	0.0313925
2017	2017-06-17	604N	6	4	N	0.02	20.58	20.6	0.130657
2017	2017-06-17	605N	6	5	N	26.18		26.18	0.0701
2017	2017-06-17	606N	6	6	N	60.51		60.51	0.14629
2017	2017-06-12	101S	1	1	S	51.76		51.76	0.174958
2017	2017-06-12	102S	1	2	S	48.38	6.17	54.55	0.228412
2017	2017-06-12	103S	1	3	S	8.79			0.10794
2017	2017-06-12	104S	1	4	S	13.18		13.18	0.06869
2017	2017-06-12	105S	1	5	S	22.79	7.5	30.29	0.165775
2017	2017-06-12	106S	1	6	S	20.78		20.78	0.08457
2017	2017-06-12	201S	2	1	S	23.5		23.5	0.135925
2017	2017-06-12	202S	2	2	S	46.26	4.96	51.22	0.206625
2017	2017-06-12	203S	2	3	S	16.16		16.16	0.104603
2017	2017-06-12	204S	2	4	S	7.85	7.39	15.24	0.0724375
2017	2017-06-12	205S	2	5	S	34.12		34.12	0.137515
2017	2017-06-12	206S	2	6	S	17.79	3.3	21.09	0.11184
2017	2017-06-12	301S	3	1	S	12.07		12.07	0.0573075
2017	2017-06-12	302S	3	2	S	39.08		39.08	0.151075
2017	2017-06-12	303S	3	3	S		0.53		0.0877525
2017	2017-06-12	304S	3	4	S	16.22	5.43	21.65	0.130933
2017	2017-06-12	305S	3	5	S	29.2		29.2	0.160305
2017	2017-06-12	306S	3	6	S	10.74	9.8	20.54	0.133871
2017	2017-06-12	401S	4	1	S	10.85	8.4	19.25	0.130538
2017	2017-06-12	402S	4	2	S				0.0986575
2017	2017-06-12	403S	4	3	S	10.92		10.92	0.0544425
2017	2017-06-12	404S	4	4	S	2.7	9.88	12.58	0.0929775
2017	2017-06-12	405S	4	5	S	0.73		0.73	0.0131425
2017	2017-06-12	406S	4	6	S	22.03	6.52	28.55	0.134303
2017	2017-06-12	501S	5	1	S	8.61	7.93	16.54	0.22915
2017	2017-06-12	502S	5	2	S	7.62		7.62	0.03991
2017	2017-06-12	503S	5	3	S	35.15	5.33	40.48	0.209995
2017	2017-06-12	504S	5	4	S	15.38		15.38	0.093275
2017	2017-06-12	505S	5	5	S	38.57	12.01	50.58	0.0836025
2017	2017-06-12	506S	5	6	S	22.7		22.7	0.133495
2017	2017-06-12	601S	6	1	S	34.93	4.63	39.56	0.17497
2017	2017-06-12	602S	6	2	S	80.93	2.74	83.67	0.249095
2017	2017-06-12	603S	6	3	S	53.73		53.73	0.245115
2017	2017-06-12	604S	6	4	S	149.77		149.77	0.388767
2017	2017-06-12	605S	6	5	S	56.35	4.57	60.92	0.20355
2017	2017-06-12	606S	6	6	S	59.95		59.95	0.298205
2018	2018-05-08	101N	1	1	N	16.38	12.92	29.3	0.125978
2018	2018-05-08	102N	1	2	N	20.84	9.22	30.06	0.0967475
2018	2018-05-08	103N	1	3	N	25.09		25.09	0.0592025
2018	2018-05-08	104N	1	4	N	9.98		9.98	0.0192625
2018	2018-05-08	105N	1	5	N	20.17		20.17	0.0439875
2018	2018-05-08	106N	1	6	N	32.58	13.81	46.39	0.146565
2018	2018-05-08	201N	2	1	N	3.92		3.92	0.015855
2018	2018-05-08	202N	2	2	N	3.69		3.69	0.0066425
2018	2018-05-08	203N	2	3	N	3.33	9.24	12.57	0.07828
2018	2018-05-08	204N	2	4	N	2.54		2.54	0.004805
2018	2018-05-08	205N	2	5	N	3.09	6.58	9.67	0.0571825
2018	2018-05-08	206N	2	6	N	0.16	23.51	23.67	0.15292
2018	2018-05-08	301N	3	1	N	9.11		9.11	0.0301575
2018	2018-05-08	302N	3	2	N	7.48		7.48	0.02562
2018	2018-05-08	303N	3	3	N	11.77	10.19	21.96	0.0849875
2018	2018-05-08	304N	3	4	N	7.98	6.55	14.53	0.0889725
2018	2018-05-08	305N	3	5	N	16.28	10.78	27.06	0.12922
2018	2018-05-08	306N	3	6	N	31.89		31.89	0.059135
2018	2018-05-08	401N	4	1	N	0.07	10.87	10.94	0.0937175
2018	2018-05-08	402N	4	2	N	10.99		10.99	0.0351875
2018	2018-05-08	403N	4	3	N	0.15	11.61	11.76	0.114558
2018	2018-05-08	404N	4	4	N	1.28		1.28	0.022975
2018	2018-05-08	405N	4	5	N	0.98		0.98	0.0059075
2018	2018-05-08	406N	4	6	N	6.8	20.13	26.93	0.205108
2018	2018-05-08	501N	5	1	N	0.08		0.08	0.002605
2018	2018-05-08	502N	5	2	N		6.69	6.69	0.07958
2018	2018-05-08	503N	5	3	N	0.31		0.31	0.0106225
2018	2018-05-08	504N	5	4	N	0.12	8.78	8.9	0.0637225
2018	2018-05-08	505N	5	5	N		16.32	16.32	0.133898
2018	2018-05-08	506N	5	6	N	0.86		0.86	0.0043775
2018	2018-05-08	601N	6	1	N		12.2	12.2	0.103577
2018	2018-05-08	602N	6	2	N	0.18	7.69	7.87	0.07471
2018	2018-05-08	603N	6	3	N	0.19		0.19	0.0024225
2018	2018-05-08	604N	6	4	N		12.89	12.89	0.100307
2018	2018-05-08	605N	6	5	N	1.82		1.82	0.0112175
2018	2018-05-08	606N	6	6	N	0.34		0.34	0.0047725
2018	2018-05-14	101S	1	1	S	56.04		56.04	0.20276
2018	2018-05-14	102S	1	2	S	75.77	2.07	77.84	0.281653
2018	2018-05-14	103S	1	3	S	23.57	8.14	31.71	0.152207
2018	2018-05-14	104S	1	4	S	28.63		28.63	0.08734
2018	2018-05-14	105S	1	5	S	13.87	13.53	27.4	0.155012
2018	2018-05-14	106S	1	6	S	50.09		50.09	0.20361
2018	2018-05-14	201S	2	1	S	28.4		28.4	0.092295
2018	2018-05-14	202S	2	2	S	63.06	2.66	65.72	0.277415
2018	2018-05-14	203S	2	3	S	1.42		1.42	0.01022
2018	2018-05-14	204S	2	4	S	26.42	19.1	45.52	0.191943
2018	2018-05-14	205S	2	5	S	9.8		9.8	0.0445025
2018	2018-05-14	206S	2	6	S	52.41	11.23	63.64	0.216908
2018	2018-05-14	301S	3	1	S	31.93		31.93	0.111435
2018	2018-05-14	302S	3	2	S	5.74		5.74	0.02666
2018	2018-05-14	303S	3	3	S	2.41	20.75	23.16	0.170552
2018	2018-05-14	304S	3	4	S	13.41	18.89	32.3	0.164022
2018	2018-05-14	305S	3	5	S	36.09		36.09	0.141825
2018	2018-05-14	306S	3	6	S	2.04	21.29	23.33	0.189032
2018	2018-05-14	401S	4	1	S	17.8	8.8	26.6	0.133878
2018	2018-05-14	402S	4	2	S	27.11		27.11	0.139312
2018	2018-05-14	403S	4	3	S	26.41		26.41	0.121075
2018	2018-05-14	404S	4	4	S	0.62	7.84	8.46	0.08125
2018	2018-05-14	405S	4	5	S	0.06		0.06	0.0061425
2018	2018-05-14	406S	4	6	S	22.01	11.36	33.37	0.154993
2018	2018-05-14	501S	5	1	S	21.2	8.91	30.11	0.167695
2018	2018-05-14	502S	5	2	S	34.22		34.22	0.09552
2018	2018-05-14	503S	5	3	S	11.03	10	21.03	0.122225
2018	2018-05-14	504S	5	4	S	17.22		17.22	0.131975
2018	2018-05-14	505S	5	5	S	20.37	22.78	43.15	0.240927
2018	2018-05-14	506S	5	6	S	22.57		22.57	0.188205
2018	2018-05-14	601S	6	1	S	56.7	12.52	69.22	0.315697
2018	2018-05-14	602S	6	2	S	32.84	5.9	38.74	0.20266
2018	2018-05-14	603S	6	3	S	12.38		12.38	0.08789
2018	2018-05-14	604S	6	4	S	78.15		78.15	0.222428
2018	2018-05-14	605S	6	5	S	80.82	13.83	94.65	0.245745
2018	2018-05-14	606S	6	6	S	27.89		27.89	0.0585525
2019	2019-06-19	101N	1	1	N	4.72	35.36	40.08	0.0133333
2019	2019-06-19	102N	1	2	N	10.76	30.22	40.98	0.05
2019	2019-06-19	103N	1	3	N	11.65		11.65	0.11
2019	2019-06-19	104N	1	4	N	10.36		10.36	0.28
2019	2019-06-19	105N	1	5	N	17.14		17.14	0.0366667
2019	2019-06-19	106N	1	6	N		36.04	36.04	0.136667
2019	2019-06-19	201N	2	1	N	22.76		22.76	0.23
2019	2019-06-19	202N	2	2	N	37.06		37.06	0.0866667
2019	2019-06-19	203N	2	3	N	8.13	19.12	27.25	0.323333
2019	2019-06-19	204N	2	4	N	18.89		18.89	0.28
2019	2019-06-19	205N	2	5	N	18.22	23.34	41.56	0.0966667
2019	2019-06-19	206N	2	6	N	0.81	30.06	30.87	0.0833333
2019	2019-06-19	301N	3	1	N	27.15		27.15	0.303333
2019	2019-06-19	302N	3	2	N	11.36		11.36	0.263333
2019	2019-06-19	303N	3	3	N	21.12	19.92	41.04	0.256667
2019	2019-06-19	304N	3	4	N	4.81	23.72	28.53	0.0233333
2019	2019-06-19	305N	3	5	N	3.85	22.86	26.71	0.233333
2019	2019-06-19	306N	3	6	N	1.45		1.45	0.243333
2019	2019-06-19	401N	4	1	N	18.1	12.6	30.7	0.18
2019	2019-06-19	402N	4	2	N	36.82		36.82	0.07
2019	2019-06-19	403N	4	3	N	0.9	15.28	16.18	0.666667
2019	2019-06-19	404N	4	4	N	11.81		11.81	0.323333
2019	2019-06-19	405N	4	5	N	25.88		25.88	0.0866667
2019	2019-06-19	406N	4	6	N	5.22	27.15	32.37	0.303333
2019	2019-06-19	501N	5	1	N	19.52		19.52	0.0666667
2019	2019-06-19	502N	5	2	N	26.3	17.35	43.65	0.37
2019	2019-06-19	503N	5	3	N	8.7		8.7	0.366667
2019	2019-06-19	504N	5	4	N	8.16	22.38	30.54	0.2
2019	2019-06-19	505N	5	5	N	12.26	24.51	36.77	0.216667
2019	2019-06-19	506N	5	6	N	28.04		28.04	0.186667
2019	2019-06-19	601N	6	1	N	9.12	12.58	21.7	0.213333
2019	2019-06-19	602N	6	2	N	1.42	10.96	12.38	0.343333
2019	2019-06-19	603N	6	3	N	32.95		32.95	0.196667
2019	2019-06-19	604N	6	4	N	5.79	29.15	34.94	0.133333
2019	2019-06-19	605N	6	5	N	35.51		35.51
2019	2019-06-19	606N	6	6	N	23.08		23.08
2019	2019-05-16	101S	1	1	S	53.6		53.6	0.4
2019	2019-05-16	102S	1	2	S	10.9	7.74	18.64	0.25
2019	2019-05-16	103S	1	3	S	9.02	9.47	18.49	0.216667
2019	2019-05-16	104S	1	4	S	14.2		14.2	0.136667
2019	2019-05-16	105S	1	5	S	6.38	14.65	21.03	0.293333
2019	2019-05-16	106S	1	6	S	25.98		25.98	0.206667
2019	2019-05-16	201S	2	1	S	32.52		32.52	0.263333
2019	2019-05-16	202S	2	2	S	3.07	17.9	20.97	0.276667
2019	2019-05-16	203S	2	3	S	11.18		11.18	0.106667
2019	2019-05-16	204S	2	4	S	9.73	18.3	28.03	0.313333
2019	2019-05-16	205S	2	5	S	15.67		15.67	0.163333
2019	2019-05-16	206S	2	6	S	9.74	8.55	18.29	0.246667
2019	2019-05-16	301S	3	1	S	3.61		3.61	0.0333333
2019	2019-05-16	302S	3	2	S	3.73		3.73	0.0466667
2019	2019-05-16	303S	3	3	S	10.73	13.94	24.67	0.276667
2019	2019-05-16	304S	3	4	S	6.94	11.46	18.4	0.213333
2019	2019-05-16	305S	3	5	S	4.17		4.17	0.103333
2019	2019-05-16	306S	3	6	S	0.55	12.81	13.36	0.246667
2019	2019-05-16	401S	4	1	S	1.04	18.55	19.59	0.313333
2019	2019-05-16	402S	4	2	S	5.05		5.05	0.07
2019	2019-05-16	403S	4	3	S	1.24		1.24	0.04
2019	2019-05-16	404S	4	4	S				0.353333
2019	2019-05-16	405S	4	5	S	2.33		2.33	0.0766667
2019	2019-05-16	406S	4	6	S		14.72	14.72	2.93333
2019	2019-05-16	501S	5	1	S	1.96	11.56	13.52	0.226667
2019	2019-05-16	502S	5	2	S	25.4		25.4	0.23
2019	2019-05-16	503S	5	3	S	9.72	15.84	25.56	0.29
2019	2019-05-16	504S	5	4	S	6.78		6.78	0.106667
2019	2019-05-16	505S	5	5	S	5.4	17.69	23.09	0.323333
2019	2019-05-16	506S	5	6	S	11.61		11.61	0.11
2019	2019-05-16	601S	6	1	S	9.88	16.37	26.25	0.34
2019	2019-05-16	602S	6	2	S	19.6	14.05	33.65	0.353333
2019	2019-05-16	603S	6	3	S	23.32		23.32	0.256667
2019	2019-05-16	604S	6	4	S	3.45		3.45	0.07
2019	2019-05-16	605S	6	5	S	13.57	11.08	24.65	0.35
2019	2019-05-16	606S	6	6	S	23.63		23.63	0.31

## Sheet: meta data
Year	2017-2019
Date	May or June depending on year, in Month/Day/Year format
Plot_ID	unique plot Id that includes information on block, plot and field (see below)
Block	Blocking N-S
Plot	Blocking E-W
Field	North or South
Weeds_g	biomas of weed species
Cover.crop_g	biomass of planted cover crop
Total biomass_g	sum of weeds and cover crop
area cover_m2	percent area covered, determined using photographs and area of green plant material extracted using ImageJ
