# Supplementary material for: Insecticides may facilitate the escape of weeds from biological control
Source: PeerJ. 2025 Jan 13;13:e18597. doi: 10.7717/peerj.18597 (PMC11737330; doi:10.7717/peerj.18597)
Supplement: Supplemental Information 5 [file peerj-13-18597-s005.xlsx]

## Sheet: weedseedbank_2017_2018_2019_Apr
Year	WSBorAugust	Field	Plot_ID	Block	Plot	Crop	Abt	Ac	Acm	Am	Amr	Ar	Bif	Br	Cabp	Cah	Ce	Cha	Ci	Coa	Coc	Er	Eum	Laa	Loi	Mel	Mov	Oxs	Ph	Plm	Po	Poo	Pos	Pr	Raj	Rua	SM	So	Sop	Stm	Ta	Tha	Tr	UNK2	UNK3	Ve	Vi	Cyr	Dii
2017	WSB	N	101N	1	1	soy	0	0	0	0	0	0	0	0	0	0	0	1	0	0	0	0	0	0	0	0	0	1	0	0	0	0	0	0	0	0	0	0	0	0	0	0	0	0	0	0	0	0	0
2017	WSB	N	102N	1	2	soy	0	0	0	0	8	0	0	0	0	0	0	13	0	0	0	0	0	0	0	0	0	19	0	0	0	1	0	0	0	0	0	0	0	0	0	0	0	0	0	0	0	0	0
2017	WSB	N	103N	1	3	soy	0	0	0	0	2	0	0	0	0	2	0	7	0	0	0	0	0	0	0	0	0	14	0	0	0	4	0	0	0	0	0	0	0	0	1	0	0	0	0	0	0	0	0
2017	WSB	N	104N	1	4	soy	0	0	0	0	4	0	0	0	0	0	0	11	0	0	0	0	0	0	0	0	0	20	0	0	0	51	0	0	0	0	0	0	1	0	0	0	0	0	0	0	0	0	0
2017	WSB	N	105N	1	5	soy	0	0	0	0	2	0	0	0	0	0	0	36	0	0	0	0	0	0	0	0	0	4	0	0	0	9	0	0	0	0	0	0	0	0	0	0	0	0	0	0	0	0	0
2017	WSB	N	106N	1	6	soy	0	0	0	0	15	0	0	0	0	1	0	51	0	0	1	0	0	0	0	0	0	27	0	0	0	7	0	0	0	0	0	0	10	0	1	0	0	0	0	0	0	0	0
2017	WSB	N	201N	2	1	soy	0	0	0	0	6	0	0	0	0	3	0	10	0	0	0	0	0	0	0	0	0	12	0	0	0	0	0	0	0	0	0	0	0	0	0	0	0	0	0	0	0	0	5
2017	WSB	N	202N	2	2	soy	0	0	0	0	2	0	0	0	0	6	0	25	0	0	0	0	0	0	0	0	0	6	0	0	0	0	0	0	0	0	0	0	0	0	0	0	0	0	0	0	0	0	2
2017	WSB	N	203N	2	3	soy	0	0	0	0	0	0	0	0	0	0	0	16	0	0	0	0	0	0	0	0	0	0	0	0	0	0	0	0	0	0	0	0	0	0	0	0	0	0	0	0	0	0	0
2017	WSB	N	204N	2	4	soy	0	0	0	0	3	0	0	0	0	2	0	27	0	0	0	0	0	0	0	0	0	12	0	0	0	4	0	0	0	0	0	0	2	0	0	0	0	0	0	1	0	0	0
2017	WSB	N	205N	2	5	soy	0	0	0	0	2	0	0	0	0	10	0	61	0	0	0	0	0	0	0	0	0	16	0	0	0	0	0	0	0	0	0	0	0	0	0	0	0	0	0	0	0	0	0
2017	WSB	N	206N	2	6	soy	0	0	0	0	3	0	0	0	0	3	0	43	0	0	1	0	1	0	0	0	0	25	0	0	0	18	0	0	0	0	0	0	0	0	0	0	0	0	0	0	0	0	0
2017	WSB	N	301N	3	1	soy	0	0	0	0	1	0	0	0	0	0	0	5	0	0	0	0	0	0	0	0	0	14	0	0	0	0	0	0	0	0	0	0	0	0	0	0	0	0	0	0	0	0	0
2017	WSB	N	302N	3	2	soy	0	0	0	0	2	0	0	0	0	5	0	3	0	0	0	0	0	0	0	0	0	3	0	0	0	0	0	0	0	0	0	0	0	0	0	0	0	0	0	0	0	0	0
2017	WSB	N	303N	3	3	soy	0	0	0	0	2	0	0	0	0	0	0	5	0	0	0	0	0	0	0	0	0	2	0	0	0	0	0	0	0	0	0	0	0	0	0	0	0	0	0	0	0	0	0
2017	WSB	N	304N	3	4	soy	0	0	0	0	1	0	0	0	0	18	0	0	0	0	0	0	0	1	0	0	0	17	0	0	0	0	0	0	0	0	0	0	1	0	0	0	0	0	0	0	0	0	0
2017	WSB	N	305N	3	5	soy	0	0	0	0	7	0	0	0	0	20	0	6	0	0	1	0	0	0	0	0	0	13	0	0	0	4	0	0	0	0	0	0	0	0	9	0	0	0	0	1	0	0	0
2017	WSB	N	306N	3	6	soy	0	0	0	0	1	0	0	0	0	13	0	11	0	0	0	0	0	0	0	0	0	15	0	0	0	22	0	0	0	0	0	0	1	0	0	1	0	0	0	5	0	0	1
2017	WSB	N	401N	4	1	soy	0	0	0	0	0	0	0	1	0	21	0	2	0	0	0	0	0	1	0	0	0	9	0	0	0	0	0	0	0	1	0	0	0	0	0	0	0	0	0	0	0	0	0
2017	WSB	N	402N	4	2	soy	0	0	0	0	2	0	0	0	0	62	0	0	0	0	0	0	0	1	0	0	0	12	0	0	0	0	0	0	0	1	0	0	1	0	1	0	0	0	0	0	0	0	0
2017	WSB	N	403N	4	3	soy	0	0	0	0	2	0	0	0	0	0	0	1	0	0	0	0	0	3	0	0	0	6	0	0	0	0	0	0	0	0	0	0	0	0	0	0	0	0	0	0	0	0	0
2017	WSB	N	404N	4	4	soy	0	0	0	0	6	0	0	0	0	11	0	4	0	0	0	0	0	3	0	0	0	32	0	0	0	0	0	0	0	0	0	0	0	0	0	0	0	0	0	0	0	0	0
2017	WSB	N	405N	4	5	soy	0	0	0	0	5	0	0	0	0	111	0	8	0	0	0	0	0	1	0	0	0	21	0	0	0	0	0	0	0	0	0	0	0	0	0	0	0	0	0	0	0	0	0
2017	WSB	N	406N	4	6	soy	0	0	0	0	0	0	0	0	0	49	1	2	0	0	0	0	0	1	0	0	0	28	0	0	0	0	0	0	0	4	0	0	0	0	2	0	0	0	0	0	0	0	0
2017	WSB	N	501N	5	1	soy	0	0	0	0	4	0	0	0	0	44	0	2	0	0	0	0	0	6	0	0	0	26	0	0	0	0	0	0	0	0	0	0	1	0	0	0	0	0	0	7	0	0	0
2017	WSB	N	502N	5	2	soy	0	0	0	0	2	0	0	0	0	74	0	1	0	0	0	0	0	6	0	0	0	41	0	0	0	3	0	0	0	0	0	0	0	0	0	0	0	0	0	0	0	0	0
2017	WSB	N	503N	5	3	soy	0	0	0	0	0	0	0	0	0	0	0	0	0	0	0	0	0	3	0	0	0	8	0	0	0	0	0	0	0	0	0	0	0	0	0	0	0	0	0	0	0	0	0
2017	WSB	N	504N	5	4	soy	0	0	0	0	6	0	0	0	0	14	0	0	0	0	0	0	0	5	0	0	0	80	0	0	0	0	0	0	0	0	0	0	0	0	0	2	0	0	0	0	0	0	0
2017	WSB	N	505N	5	5	soy	0	0	0	0	6	0	0	0	0	24	1	1	0	0	0	0	0	8	0	0	0	61	0	0	0	0	0	0	0	0	0	0	0	0	0	0	0	0	0	0	0	0	1
2017	WSB	N	506N	5	6	soy	0	0	0	0	2	0	0	0	0	22	0	4	0	0	0	0	0	1	0	0	0	17	0	0	0	0	0	0	0	1	0	0	0	0	0	0	0	0	0	1	0	0	0
2017	WSB	N	601N	6	1	soy	0	0	0	0	1	0	0	0	0	38	0	1	0	0	2	0	0	3	0	0	0	42	0	0	0	0	0	0	0	1	0	0	1	0	0	6	0	0	0	0	0	0	0
2017	WSB	N	602N	6	2	soy	0	0	0	0	2	0	0	0	0	85	0	0	0	0	1	0	0	7	0	0	0	34	0	0	0	0	0	0	0	0	0	0	0	0	2	2	0	0	0	0	0	0	2
2017	WSB	N	603N	6	3	soy	0	0	0	0	2	0	0	0	0	0	0	7	0	0	0	0	0	0	0	0	0	28	0	0	0	0	0	0	0	0	0	0	0	0	0	0	0	0	0	0	0	0	0
2017	WSB	N	604N	6	4	soy	0	0	0	0	3	0	0	0	0	1	0	1	0	0	0	0	0	1	0	0	0	46	0	0	0	0	0	0	0	2	0	0	0	0	0	0	0	0	0	0	0	0	1
2017	WSB	N	605N	6	5	soy	1	0	0	0	4	0	0	0	0	20	0	14	0	0	0	0	0	1	0	0	0	46	0	0	0	1	0	0	0	1	0	0	0	0	0	2	0	0	0	0	0	0	0
2017	WSB	N	606N	6	6	soy	0	0	0	0	0	0	0	0	0	0	0	0	0	0	0	0	0	0	0	0	0	0	0	0	0	0	0	0	0	0	0	0	0	0	0	0	0	0	0	0	0	0	0
2017	WSB	S	101S	1	1	corn	0	0	0	0	2	0	0	0	1	0	0	9	0	0	0	0	0	0	0	0	0	52	0	1	0	0	0	0	0	0	0	0	2	0	6	0	0	0	0	0	0	0	0
2017	WSB	S	102S	1	2	corn	0	0	0	1	0	0	0	0	0	0	0	4	0	0	3	0	0	0	0	0	0	20	0	0	0	0	0	0	1	0	0	0	8	1	17	0	0	0	0	0	0	0	0
2017	WSB	S	103S	1	3	corn	0	0	0	0	1	0	0	0	0	0	0	2	0	0	10	0	0	0	0	0	0	19	0	1	0	0	0	0	0	0	0	0	0	1	5	0	0	0	0	0	0	0	0
2017	WSB	S	104S	1	4	corn	0	0	0	1	1	0	0	0	0	0	0	3	0	0	0	0	0	0	0	0	0	18	0	0	0	0	0	0	0	0	0	0	0	1	0	0	0	0	0	0	0	0	0
2017	WSB	S	105S	1	5	corn	0	0	0	0	4	0	0	0	0	0	0	3	0	0	3	0	0	0	0	0	0	17	0	1	0	0	0	0	0	0	0	0	1	2	0	0	0	0	0	0	0	0	0
2017	WSB	S	106S	1	6	corn	0	0	0	0	2	0	0	0	0	0	0	4	0	0	4	0	0	0	0	0	0	39	0	2	0	0	0	0	0	0	0	0	3	1	1	0	1	0	0	0	0	0	0
2017	WSB	S	201S	2	1	corn	0	0	0	1	0	1	0	0	0	0	0	9	0	0	11	0	0	0	0	0	0	13	0	0	0	0	0	0	0	1	0	0	4	0	0	0	0	0	0	0	0	0	0
2017	WSB	S	202S	2	2	corn	0	0	0	0	0	0	0	0	0	0	0	10	0	0	0	0	0	0	0	0	0	21	0	1	0	0	0	0	0	0	0	0	14	0	3	0	0	0	0	0	0	0	0
2017	WSB	S	203S	2	3	corn	0	0	0	0	0	0	0	0	0	0	0	18	0	0	0	0	0	0	0	0	0	35	0	2	0	0	0	0	0	0	0	0	0	1	1	0	0	0	0	2	0	0	3
2017	WSB	S	204S	2	4	corn	0	0	0	0	0	0	0	0	0	0	0	14	0	0	1	0	0	0	0	0	0	36	0	2	0	0	0	0	0	0	0	0	1	3	6	0	0	0	0	0	0	0	0
2017	WSB	S	205S	2	5	corn	0	0	0	0	0	1	0	0	0	0	0	7	0	0	0	0	0	0	0	0	0	16	0	0	0	1	0	0	0	0	0	0	5	1	0	0	1	0	0	0	0	0	0
2017	WSB	S	206S	2	6	corn	0	0	0	0	2	0	0	0	1	1	0	13	0	0	3	0	0	0	0	0	0	10	0	0	0	0	0	0	0	0	0	0	1	1	2	0	0	0	0	0	0	0	0
2017	WSB	S	301S	3	1	corn	0	0	0	0	3	0	0	0	0	0	0	17	0	0	0	0	0	0	0	0	0	16	0	0	0	0	0	0	0	0	0	0	0	0	0	0	0	0	0	0	0	0	0
2017	WSB	S	302S	3	2	corn	0	0	0	0	0	0	0	0	0	0	0	9	0	0	0	0	0	0	0	0	0	12	0	0	0	0	0	0	0	0	0	0	1	0	0	0	0	0	0	0	0	0	0
2017	WSB	S	303S	3	3	corn	0	0	0	1	4	0	0	0	0	0	0	14	0	0	0	0	0	0	0	0	0	36	0	0	0	1	0	0	0	0	0	0	2	0	2	0	0	0	0	0	0	0	0
2017	WSB	S	304S	3	4	corn	0	0	0	0	0	0	0	0	0	0	0	12	0	0	0	0	0	0	0	0	0	15	0	0	0	0	0	0	0	0	0	0	6	0	0	0	0	0	0	0	0	0	0
2017	WSB	S	305S	3	5	corn	0	0	0	0	4	0	0	0	0	0	0	10	0	0	0	0	0	0	0	0	0	13	0	0	0	0	0	0	0	0	0	0	0	5	0	0	0	0	0	0	0	0	0
2017	WSB	S	306S	3	6	corn	0	0	0	0	3	0	0	0	0	0	0	28	0	0	2	0	0	0	0	0	0	24	0	0	0	0	0	0	0	0	0	0	5	1	0	0	0	0	0	0	0	0	0
2017	WSB	S	401S	4	1	corn	0	0	0	1	3	0	0	0	1	0	0	18	0	0	0	0	0	0	0	0	0	23	0	0	0	0	0	0	0	1	0	0	5	0	0	0	0	0	0	0	0	0	0
2017	WSB	S	402S	4	2	corn	0	0	0	0	11	0	0	0	1	0	0	25	0	0	2	0	0	0	0	0	0	32	0	1	0	1	0	0	0	0	0	0	0	0	0	0	0	0	0	0	0	0	0
2017	WSB	S	403S	4	3	corn	0	0	0	0	1	0	1	0	0	2	0	18	0	0	0	0	0	0	1	0	0	18	0	1	0	0	0	0	0	0	0	2	0	1	2	0	0	0	0	0	0	0	0
2017	WSB	S	404S	4	4	corn	0	0	0	0	3	0	0	0	0	0	0	27	0	0	1	0	0	0	0	0	0	36	0	3	0	1	14	0	0	0	0	0	0	4	2	0	0	0	0	0	0	0	0
2017	WSB	S	405S	4	5	corn	0	0	0	0	1	0	0	0	0	0	0	24	0	0	0	0	0	0	1	0	0	15	0	0	0	0	0	0	0	0	0	0	3	4	0	0	0	0	0	0	0	0	0
2017	WSB	S	406S	4	6	corn	0	0	0	1	0	0	0	0	0	0	0	12	0	0	1	0	0	0	0	0	0	1	0	11	0	0	1	0	0	0	0	0	2	0	8	0	0	0	0	0	0	0	0
2017	WSB	S	501S	5	1	corn	0	0	0	0	2	0	0	0	0	0	0	25	0	0	0	0	0	0	0	0	0	31	0	2	0	0	0	0	0	0	0	0	2	0	0	0	0	0	0	0	0	0	1
2017	WSB	S	502S	5	2	corn	0	0	0	0	2	0	0	0	0	0	0	23	0	0	0	0	0	0	0	0	0	18	0	2	0	0	0	0	0	0	0	0	1	0	1	0	0	0	0	0	0	0	0
2017	WSB	S	503S	5	3	corn	0	0	0	0	8	0	0	0	0	0	1	13	0	0	1	0	0	0	0	0	0	29	0	4	0	0	0	0	0	0	0	0	3	0	1	0	0	0	0	0	0	0	0
2017	WSB	S	504S	5	4	corn	0	0	0	0	2	0	0	0	0	0	0	32	0	0	2	0	0	0	0	0	0	26	0	5	0	0	2	0	1	0	0	0	3	1	0	0	0	0	0	0	0	0	0
2017	WSB	S	505S	5	5	corn	0	0	0	0	2	0	0	0	3	0	3	20	0	0	1	0	0	0	0	0	0	12	0	2	0	0	0	0	0	0	0	0	0	2	0	0	0	0	0	0	0	0	1
2017	WSB	S	506S	5	6	corn	0	0	0	0	3	0	0	0	1	1	0	13	0	0	0	0	0	0	0	0	0	12	0	5	0	0	0	0	0	0	0	0	13	1	3	0	0	0	0	0	0	0	0
2017	WSB	S	601S	6	1	corn	0	0	2	0	1	0	0	0	0	2	0	18	0	0	7	0	0	0	0	1	0	1	0	0	0	0	0	0	0	1	0	0	0	0	10	0	0	0	0	0	0	0	5
2017	WSB	S	602S	6	2	corn	0	0	3	0	2	0	0	0	0	2	4	11	0	0	6	0	0	0	0	0	0	1	0	1	0	0	0	0	0	0	0	0	1	0	34	0	0	0	0	0	0	0	4
2017	WSB	S	603S	6	3	corn	0	0	2	0	0	0	0	0	0	0	3	20	0	0	39	0	0	0	0	0	0	18	0	1	0	7	0	0	0	0	0	0	1	2	9	0	0	0	0	0	0	0	4
2017	WSB	S	604S	6	4	corn	0	0	1	0	1	0	0	0	3	0	2	17	0	0	21	0	0	0	0	0	0	0	0	0	0	1	0	0	0	0	0	0	5	0	56	0	0	0	0	0	0	0	0
2017	WSB	S	605S	6	5	corn	0	0	3	0	1	0	0	0	0	0	2	59	0	0	31	0	0	0	0	1	0	6	0	0	0	1	0	0	0	0	0	0	3	0	52	0	0	0	0	0	0	0	0
2017	WSB	S	606S	6	6	corn	0	0	1	0	1	0	0	0	5	1	0	33	0	0	40	0	0	1	0	0	0	5	0	0	0	3	0	0	0	0	0	0	1	7	1	0	0	0	0	0	0	0	0
2018	WSB	N	101N	1	1	corn	0	0	0	0	8	0	0	0	0	2	0	20	0	0	0	0	3	0	0	0	0	22	0	0	0	0	0	0	0	0	0	0	0	0	0	0	0	0	0	0	0	0	1
2018	WSB	N	102N	1	2	corn	0	0	0	0	5	0	0	0	0	1	0	2	0	0	0	0	1	0	0	0	0	2	0	0	0	0	0	0	0	0	0	0	0	0	0	0	0	0	0	0	0	0	0
2018	WSB	N	103N	1	3	corn	0	0	0	0	4	0	0	0	0	2	0	11	0	0	0	7	0	0	0	0	0	4	0	0	0	1	0	0	0	0	0	0	4	0	52	0	0	0	0	0	0	0	0
2018	WSB	N	104N	1	4	corn	0	0	0	0	6	0	0	0	0	0	0	6	0	0	0	0	0	0	0	0	0	10	0	0	0	11	0	0	0	0	0	0	0	0	0	0	0	0	0	0	0	0	1
2018	WSB	N	105N	1	5	corn	0	0	0	0	4	0	0	0	0	1	0	16	0	0	0	0	0	1	0	0	0	5	0	1	0	23	0	0	0	0	0	0	26	0	0	0	0	0	0	0	0	0	1
2018	WSB	N	106N	1	6	corn	0	0	0	0	5	0	0	0	0	0	0	23	0	0	0	0	0	0	0	0	0	12	0	0	0	16	0	0	0	0	0	0	1	0	0	0	0	0	0	0	0	0	0
2018	WSB	N	201N	2	1	corn	0	0	0	0	2	0	0	0	0	2	0	19	0	0	0	0	0	0	0	0	0	8	0	0	0	0	0	0	0	0	0	0	1	0	0	0	0	0	0	0	0	0	1
2018	WSB	N	202N	2	2	corn	0	0	0	0	3	0	0	0	0	3	0	11	0	0	0	0	0	0	0	0	0	4	0	0	0	0	0	0	0	0	0	0	0	0	0	0	0	0	0	0	0	0	0
2018	WSB	N	203N	2	3	corn	0	0	0	0	1	0	0	0	0	5	0	15	0	0	1	0	0	0	0	0	0	5	0	0	0	0	0	0	0	0	0	0	0	0	0	0	0	0	0	0	0	0	0
2018	WSB	N	204N	2	4	corn	0	0	0	0	6	0	0	0	0	2	0	8	0	0	0	2	0	0	0	0	0	34	0	0	0	2	0	0	0	0	0	0	0	0	0	0	0	0	0	0	0	0	0
2018	WSB	N	205N	2	5	corn	0	0	0	0	1	0	0	0	0	0	0	20	0	0	0	0	0	0	0	0	0	10	0	0	0	1	0	0	0	0	0	0	2	0	0	0	0	0	0	0	0	0	0
2018	WSB	N	206N	2	6	corn	0	0	0	0	3	0	0	0	0	0	0	21	0	0	0	1	0	0	0	0	0	11	0	0	0	4	0	0	0	0	0	0	2	0	0	0	0	0	0	0	0	0	0
2018	WSB	N	301N	3	1	corn	0	0	0	0	5	0	0	0	1	16	0	21	0	0	0	0	0	0	0	0	0	16	0	0	0	0	0	0	0	0	0	0	1	0	0	0	0	0	0	0	0	0	1
2018	WSB	N	302N	3	2	corn	0	0	0	0	6	0	0	0	0	1	0	67	0	0	0	0	0	0	0	0	0	3	0	0	0	3	0	0	0	0	0	0	0	0	0	0	0	0	0	0	0	0	0
2018	WSB	N	303N	3	3	corn	0	0	0	0	5	0	0	0	0	4	0	4	0	0	0	1	0	0	0	0	0	4	0	0	0	0	0	0	0	0	0	0	0	0	0	0	0	0	0	0	0	0	0
2018	WSB	N	304N	3	4	corn	0	0	0	0	2	0	0	0	0	9	0	0	0	0	0	0	0	0	0	0	0	2	0	0	0	0	0	0	0	0	0	0	0	0	0	0	0	0	0	0	0	0	0
2018	WSB	N	305N	3	5	corn	0	0	0	0	3	0	0	0	0	0	0	2	0	0	0	0	0	0	0	0	0	3	0	0	0	4	0	0	0	0	0	0	1	0	0	0	0	0	0	0	0	0	0
2018	WSB	N	306N	3	6	corn	0	0	0	0	2	0	0	0	0	1	1	2	0	0	8	1	0	0	0	0	1	6	0	1	0	12	0	0	0	0	0	0	2	0	0	0	0	0	0	0	0	0	0
2018	WSB	N	401N	4	1	corn	0	0	0	0	10	0	0	0	0	47	0	19	0	0	8	2	0	2	0	0	0	13	0	1	0	0	0	0	0	0	0	0	1	0	0	0	0	0	0	0	0	0	0
2018	WSB	N	402N	4	2	corn	0	0	0	0	3	0	0	0	0	23	1	2	0	0	0	0	0	0	0	0	0	9	0	0	0	0	0	0	0	0	0	0	0	0	0	0	0	0	0	0	0	0	0
2018	WSB	N	403N	4	3	corn	0	0	0	0	4	0	0	0	0	2	0	0	0	0	0	9	1	0	0	0	0	43	0	0	0	0	0	0	0	0	0	0	1	0	0	0	0	0	0	0	0	0	0
2018	WSB	N	404N	4	4	corn	0	0	0	0	2	0	0	0	0	17	0	5	0	0	1	3	0	0	0	0	0	13	0	0	0	0	0	0	0	0	0	0	0	0	0	0	0	0	0	0	0	0	0
2018	WSB	N	405N	4	5	corn	0	0	0	0	0	0	0	0	0	0	0	0	0	0	0	0	0	0	0	0	0	0	0	0	0	0	0	0	0	0	0	0	0	0	0	0	0	0	0	0	0	0	0
2018	WSB	N	406N	4	6	corn	0	0	0	0	3	0	0	0	0	18	1	4	0	0	0	0	0	1	0	0	0	15	0	0	0	0	0	0	0	0	0	0	0	0	0	0	0	0	0	0	0	0	0
2018	WSB	N	501N	5	1	corn	0	0	0	0	2	0	0	0	0	23	0	2	0	0	0	1	0	0	0	0	0	9	0	0	0	0	0	0	0	0	0	0	0	0	0	0	0	0	0	0	0	0	0
2018	WSB	N	502N	5	2	corn	0	0	0	0	4	0	0	0	0	32	0	1	0	0	0	5	0	1	0	0	0	14	0	0	0	1	0	0	0	0	0	0	0	0	0	0	0	0	0	0	0	0	0
2018	WSB	N	503N	5	3	corn	0	0	0	0	1	0	0	0	0	0	0	0	0	0	0	3	0	0	0	0	0	31	0	1	0	0	0	0	0	0	0	0	0	0	0	0	0	0	0	0	0	0	0
2018	WSB	N	504N	5	4	corn	0	0	0	0	0	0	0	0	0	1	0	0	0	0	0	5	0	1	0	0	0	24	0	2	0	0	0	0	0	0	0	0	0	0	0	0	0	0	0	0	0	0	0
2018	WSB	N	505N	5	5	corn	0	0	0	0	0	0	0	0	0	1	0	0	0	0	0	0	0	1	0	0	0	23	0	0	0	0	0	0	0	0	0	0	0	0	0	0	0	0	0	0	0	0	0
2018	WSB	N	506N	5	6	corn	0	0	0	0	1	0	0	0	1	18	0	2	0	0	3	4	0	0	0	0	0	11	0	1	0	14	4	0	0	0	0	0	0	0	0	0	0	0	0	0	0	0	0
2018	WSB	N	601N	6	1	corn	0	0	0	0	2	0	0	0	0	23	0	1	0	0	0	1	0	0	0	0	0	4	0	0	0	1	0	0	0	0	0	0	0	0	0	0	0	0	0	0	0	0	0
2018	WSB	N	602N	6	2	corn	0	0	0	0	0	0	0	0	0	1	0	0	0	0	0	0	0	0	0	0	0	3	0	0	0	0	0	0	0	0	0	0	0	0	0	0	0	0	0	0	0	0	0
2018	WSB	N	603N	6	3	corn	0	0	0	0	0	0	0	0	0	0	0	0	0	0	0	4	0	0	0	0	0	18	0	0	0	0	0	0	0	0	0	0	0	0	1	0	0	0	0	0	0	0	0
2018	WSB	N	604N	6	4	corn	0	0	0	0	0	0	0	0	0	5	0	0	0	0	0	0	0	0	0	0	0	6	0	0	0	0	0	0	0	0	0	0	0	0	0	0	0	0	0	0	0	0	0
2018	WSB	N	605N	6	5	corn	0	0	0	0	4	0	0	0	0	13	0	4	0	0	0	0	0	1	0	0	0	1	0	0	0	0	0	0	0	0	0	0	0	0	2	0	0	0	0	0	0	0	0
2018	WSB	N	606N	6	6	corn	0	0	0	0	1	0	0	0	0	17	0	3	0	0	1	5	0	0	0	0	0	7	0	0	0	0	0	0	0	0	0	0	0	0	0	0	0	0	0	0	0	0	0
2018	WSB	S	101S	1	1	soy	0	0	0	0	0	0	0	0	0	2	0	0	0	0	0	0	0	0	0	0	0	4	0	0	0	0	0	0	0	0	0	0	0	0	0	0	0	0	0	0	0	0	1
2018	WSB	S	102S	1	2	soy	0	0	0	0	1	0	0	0	0	0	0	2	0	0	0	0	0	0	0	0	0	50	0	1	0	0	0	0	0	0	0	0	4	0	1	0	0	0	0	0	0	0	0
2018	WSB	S	103S	1	3	soy	0	0	0	0	1	0	0	0	0	0	0	0	0	0	0	0	0	0	0	0	0	29	0	0	0	0	0	0	0	0	0	0	0	0	0	0	0	0	0	0	0	0	0
2018	WSB	S	104S	1	4	soy	0	0	0	0	7	0	0	0	0	0	0	0	0	0	0	0	0	1	0	0	0	26	0	1	0	0	0	0	0	0	0	0	1	0	0	0	0	0	0	0	0	0	0
2018	WSB	S	105S	1	5	soy	0	0	0	0	2	0	0	0	0	0	0	0	0	0	0	0	0	0	0	0	0	10	0	0	0	0	0	0	0	0	0	0	3	0	0	0	0	0	0	0	0	0	0
2018	WSB	S	106S	1	6	soy	0	0	0	0	1	0	0	0	1	0	0	1	0	0	0	0	0	0	0	0	0	27	0	7	0	0	0	0	0	0	0	0	1	0	0	0	0	0	0	0	0	0	1
2018	WSB	S	201S	2	1	soy	0	0	0	1	0	0	0	0	0	0	0	2	0	0	0	0	0	0	0	0	0	1	0	0	0	0	0	0	0	0	0	0	0	0	0	0	0	0	0	0	0	0	0
2018	WSB	S	202S	2	2	soy	0	0	0	0	0	0	0	0	0	0	0	0	0	0	0	0	0	0	0	0	0	0	0	0	0	0	0	0	0	0	0	0	0	0	0	0	0	0	0	0	0	0	0
2018	WSB	S	203S	2	3	soy	0	0	0	0	1	0	0	0	0	0	0	1	0	0	0	0	0	0	0	0	0	14	0	3	0	0	0	0	0	0	0	0	2	0	0	0	0	0	0	0	0	0	0
2018	WSB	S	204S	2	4	soy	0	0	0	2	2	0	1	0	0	0	0	3	0	0	1	0	0	0	0	0	0	20	0	0	0	0	0	0	0	0	0	0	0	0	0	0	0	0	0	0	0	0	0
2018	WSB	S	205S	2	5	soy	0	0	0	0	0	0	0	0	0	0	0	3	0	0	0	2	0	0	0	0	0	27	0	1	0	0	0	0	0	0	0	0	0	0	0	0	0	0	0	0	0	0	0
2018	WSB	S	206S	2	6	soy	0	0	0	1	1	0	0	0	0	0	1	4	0	0	0	2	0	0	0	0	0	26	0	0	0	0	0	0	0	0	0	0	0	0	0	0	0	0	0	0	0	0	0
2018	WSB	S	301S	3	1	soy	0	0	0	1	0	0	0	0	0	0	0	1	0	0	0	0	0	0	0	0	0	11	0	0	0	0	0	0	0	0	0	0	0	0	0	0	0	0	0	0	0	0	0
2018	WSB	S	302S	3	2	soy	0	0	0	0	2	0	0	0	0	0	0	0	0	0	0	0	0	0	0	0	0	21	0	0	0	0	0	0	0	0	0	0	0	0	0	0	0	0	0	0	0	0	0
2018	WSB	S	303S	3	3	soy	0	0	0	0	0	0	0	0	0	0	0	0	0	0	0	0	0	0	0	0	0	14	0	0	0	0	0	0	0	0	0	0	1	0	0	0	0	0	0	0	0	0	0
2018	WSB	S	304S	3	4	soy	0	0	0	0	2	0	0	0	0	0	0	8	0	0	0	3	0	0	0	0	0	21	0	0	0	0	0	0	0	0	0	0	1	0	0	0	0	0	0	0	0	0	0
2018	WSB	S	305S	3	5	soy	0	0	0	0	0	0	0	0	0	0	0	1	0	0	0	1	0	0	0	0	0	11	0	1	0	0	0	0	0	0	0	0	3	1	0	0	0	0	0	0	0	0	0
2018	WSB	S	306S	3	6	soy	0	0	0	0	0	0	0	0	0	0	0	5	0	0	0	0	0	0	0	0	0	27	0	0	0	0	1	0	0	0	0	0	2	0	0	0	0	0	0	0	0	0	0
2018	WSB	S	401S	4	1	soy	0	0	0	1	0	0	0	0	0	0	0	6	0	0	0	2	0	0	0	0	0	27	0	1	0	0	0	0	0	0	0	0	2	0	0	0	0	0	0	0	0	0	0
2018	WSB	S	402S	4	2	soy	0	0	0	1	0	0	0	0	0	0	0	5	0	0	0	0	0	0	0	0	0	29	0	0	0	0	0	0	0	0	0	0	0	0	0	0	0	0	0	0	0	0	0
2018	WSB	S	403S	4	3	soy	0	0	0	1	3	0	0	0	0	0	0	11	0	0	0	1	0	0	0	0	0	64	0	0	0	0	1	0	0	0	0	0	2	0	0	0	0	0	0	0	0	0	0
2018	WSB	S	404S	4	4	soy	0	0	0	0	0	0	0	0	0	0	0	9	0	0	0	0	0	0	0	0	0	4	0	0	0	0	0	0	0	0	0	0	0	0	0	0	0	0	0	0	0	0	0
2018	WSB	S	405S	4	5	soy	0	0	0	0	0	0	0	0	0	0	0	4	0	0	0	0	0	0	0	0	0	6	0	0	0	0	0	0	0	0	0	0	0	0	0	0	0	0	0	0	0	0	0
2018	WSB	S	406S	4	6	soy	0	0	0	0	0	0	0	0	0	1	0	1	0	0	0	1	0	0	0	0	0	12	0	0	0	0	0	0	0	0	0	0	4	0	0	0	0	0	0	0	0	0	0
2018	WSB	S	501S	5	1	soy	0	0	0	0	0	0	0	0	0	0	0	3	0	0	0	0	0	0	0	0	0	13	0	0	0	0	0	0	0	0	0	0	0	0	0	0	0	0	0	0	0	0	0
2018	WSB	S	502S	5	2	soy	0	0	0	0	0	0	0	0	0	8	0	4	0	0	0	0	0	0	0	0	0	17	0	0	0	0	0	0	0	0	0	0	0	0	0	0	0	0	0	0	0	0	0
2018	WSB	S	503S	5	3	soy	0	0	0	0	0	0	0	0	0	0	0	4	0	0	0	1	0	0	0	0	0	20	0	3	0	0	0	0	0	0	0	0	2	0	0	0	0	0	0	0	0	0	3
2018	WSB	S	504S	5	4	soy	0	0	0	0	1	0	0	0	1	0	0	15	0	0	0	2	0	0	0	0	0	40	0	1	0	0	0	0	0	0	0	0	3	0	1	0	0	0	0	0	0	0	2
2018	WSB	S	505S	5	5	soy	0	0	0	0	0	0	0	0	0	2	0	0	0	0	0	3	0	0	0	0	0	23	0	1	0	0	0	0	0	0	0	0	0	0	0	0	0	0	0	0	0	0	0
2018	WSB	S	506S	5	6	soy	0	0	0	0	2	0	0	0	0	0	0	2	0	0	0	0	0	0	0	0	0	27	0	0	0	0	0	0	0	0	0	0	1	0	1	0	0	0	0	0	0	0	3
2018	WSB	S	601S	6	1	soy	0	0	0	0	0	0	0	0	0	0	0	0	0	0	0	0	0	0	0	0	0	4	0	0	0	0	0	0	0	0	0	0	0	0	0	0	0	0	0	0	0	0	1
2018	WSB	S	602S	6	2	soy	0	0	0	0	1	0	0	0	0	0	0	0	0	0	0	0	0	0	0	0	0	2	0	0	0	0	0	0	0	0	0	0	0	0	0	0	0	0	0	0	0	0	2
2018	WSB	S	603S	6	3	soy	0	0	0	0	3	0	0	0	25	3	0	0	0	0	0	11	0	0	0	0	0	62	0	6	0	4	0	0	0	0	0	0	2	0	0	0	0	0	0	0	0	0	23
2018	WSB	S	604S	6	4	soy	0	0	0	0	1	0	0	0	45	0	7	3	0	0	0	1	0	2	0	0	0	20	0	0	0	2	0	0	0	0	0	0	2	0	0	0	0	0	0	0	0	0	12
2018	WSB	S	605S	6	5	soy	0	0	0	0	1	0	0	0	41	0	0	2	0	0	1	11	0	1	0	0	0	8	0	0	0	0	1	0	0	0	0	0	1	0	0	0	0	0	0	0	0	0	3
2018	WSB	S	606S	6	6	soy	0	0	0	0	2	0	0	0	0	0	2	0	0	0	12	1	0	0	0	0	0	3	0	0	0	5	0	0	0	0	0	0	1	0	0	0	0	0	0	0	1	0	9
2019	WSB	N	101N	1	1	soy	0	0	0	0	0	0	0	0	0	0	0	1	0	0	0	0	0	0	0	0	0	1	0	0	0	0	0	0	0	0	0	0	1	0	0	0	0	0	0	0	0	0	0
2019	WSB	N	102N	1	2	soy	0	0	0	0	1	0	0	0	0	0	0	1	0	0	0	0	0	0	0	0	0	2	0	0	0	0	0	0	0	0	0	0	1	0	1	0	0	0	0	0	0	0	0
2019	WSB	N	103N	1	3	soy	0	0	0	0	0	0	0	0	0	0	0	0	0	0	0	0	0	0	0	0	0	0	0	0	0	0	0	0	0	0	0	0	0	0	0	0	0	0	0	0	0	0	0
2019	WSB	N	104N	1	4	soy	0	0	0	0	0	0	0	0	0	0	0	1	0	0	0	0	0	0	0	0	0	0	0	0	0	7	0	0	0	0	0	0	0	0	0	0	0	0	0	0	0	0	0
2019	WSB	N	105N	1	5	soy	0	0	0	0	0	0	0	0	0	0	0	1	0	0	0	0	0	0	0	0	0	1	0	0	0	1	0	0	0	0	0	0	0	0	0	0	0	0	0	0	0	0	0
2019	WSB	N	106N	1	6	soy	0	0	0	0	0	0	0	0	0	0	0	2	0	0	0	0	0	0	0	0	0	0	0	0	0	28	0	0	0	0	0	0	0	0	0	0	0	0	0	0	0	0	0
2019	WSB	N	201N	2	1	soy	0	0	0	0	0	0	0	0	0	0	0	0	0	0	0	0	0	0	0	0	0	0	0	0	0	0	0	0	0	0	0	0	0	0	0	0	0	0	0	0	0	0	0
2019	WSB	N	202N	2	2	soy	0	0	0	0	0	0	0	0	0	1	0	0	0	0	0	0	0	0	0	0	0	0	0	0	0	1	0	0	0	0	0	0	0	0	0	0	0	0	0	0	0	0	0
2019	WSB	N	203N	2	3	soy	0	0	0	0	0	0	0	0	0	0	0	1	0	0	0	0	0	0	0	0	0	2	0	0	0	3	0	0	0	0	0	0	1	0	0	0	0	0	0	0	0	0	0
2019	WSB	N	204N	2	4	soy	0	0	0	0	0	0	0	0	0	0	0	4	0	0	0	0	0	0	0	0	0	1	0	0	0	3	0	0	0	0	0	0	0	0	0	0	0	0	0	0	0	0	0
2019	WSB	N	205N	2	5	soy	0	0	0	0	0	0	0	0	0	0	0	0	0	0	0	0	0	0	0	0	0	0	0	0	0	2	0	0	0	0	0	0	0	0	0	0	0	0	0	0	0	0	0
2019	WSB	N	206N	2	6	soy	0	0	0	0	0	0	0	0	0	0	0	1	0	0	0	0	0	0	0	0	0	5	0	0	0	16	0	0	0	0	0	0	15	0	0	0	0	0	0	0	0	0	0
2019	WSB	N	301N	3	1	soy	0	0	0	0	0	0	0	0	0	0	0	1	0	0	0	0	0	0	0	0	0	1	0	0	0	0	0	0	0	0	0	0	0	0	0	0	0	0	0	0	0	0	0
2019	WSB	N	302N	3	2	soy	0	0	0	0	0	0	0	0	0	2	0	0	0	0	0	0	0	0	0	0	0	0	0	0	0	1	0	0	0	0	0	0	0	0	0	0	0	0	0	0	0	0	0
2019	WSB	N	303N	3	3	soy	0	0	0	0	0	0	0	0	0	13	0	0	0	0	0	0	0	0	0	0	0	2	0	0	0	0	0	0	0	0	0	0	0	0	0	0	0	0	0	0	0	0	0
2019	WSB	N	304N	3	4	soy	0	0	0	0	0	0	0	0	0	1	0	0	0	0	0	0	0	0	0	0	0	1	0	0	0	0	0	0	0	0	0	0	0	0	0	0	0	0	0	0	0	0	0
2019	WSB	N	305N	3	5	soy	0	0	0	0	0	0	0	0	0	0	0	0	0	0	0	0	0	0	0	0	0	0	0	0	0	4	0	0	0	0	0	0	0	0	0	0	0	0	0	0	0	0	0
2019	WSB	N	306N	3	6	soy	0	0	0	0	0	0	0	0	0	2	0	1	0	0	3	0	0	0	0	0	0	1	0	0	0	2	0	0	0	0	0	0	1	0	0	0	0	0	0	0	0	0	0
2019	WSB	N	401N	4	1	soy	0	0	0	0	0	0	0	0	0	0	0	0	0	0	3	0	0	1	0	0	0	0	0	0	0	0	0	0	0	0	0	0	2	0	0	0	0	0	0	0	0	0	0
2019	WSB	N	402N	4	2	soy	0	0	0	0	0	0	0	0	0	10	0	0	0	0	1	0	0	1	0	0	0	1	0	0	0	0	0	0	0	0	0	0	0	0	0	0	0	0	0	0	0	0	0
2019	WSB	N	403N	4	3	soy	0	0	0	0	0	0	0	0	0	10	0	1	0	0	0	0	1	0	0	0	0	4	0	0	0	0	0	0	0	0	0	0	0	0	0	0	0	0	0	0	0	0	0
2019	WSB	N	404N	4	4	soy	0	0	0	0	3	0	0	0	0	6	0	0	0	0	0	0	0	0	0	0	0	1	0	0	0	0	0	0	0	0	0	0	1	1	0	0	0	0	0	0	0	0	0
2019	WSB	N	405N	4	5	soy	0	0	0	0	0	0	0	0	0	3	0	0	0	0	1	0	0	3	0	0	0	17	0	0	0	0	0	0	0	0	0	0	7	0	0	0	0	0	0	0	0	0	0
2019	WSB	N	406N	4	6	soy	0	0	0	0	0	0	0	0	0	37	0	0	0	0	0	0	0	0	0	0	0	6	0	0	0	0	0	0	0	1	0	0	0	0	0	0	0	0	0	0	0	0	0
2019	WSB	N	501N	5	1	soy	0	0	0	0	6	0	0	0	0	20	0	0	0	0	0	0	0	1	0	0	0	14	0	0	0	0	0	0	0	1	0	0	1	0	0	0	0	0	0	4	0	0	0
2019	WSB	N	502N	5	2	soy	0	0	0	0	0	0	0	0	0	6	0	0	0	0	0	0	0	0	0	0	0	6	0	0	0	0	0	0	0	0	0	0	0	0	0	0	0	0	0	0	0	0	0
2019	WSB	N	503N	5	3	soy	0	0	0	0	0	0	0	0	0	4	0	2	0	0	0	0	0	0	0	0	0	8	0	0	0	0	0	0	0	0	0	0	0	0	0	0	0	0	0	0	0	1	0
2019	WSB	N	504N	5	4	soy	0	0	0	0	0	0	0	0	0	5	0	0	0	0	3	0	0	2	0	0	0	12	0	0	0	0	0	0	0	1	0	0	0	0	0	0	0	0	0	0	0	0	0
2019	WSB	N	505N	5	5	soy	0	0	0	0	0	0	0	0	0	5	0	0	0	0	0	0	0	0	0	0	0	6	0	0	0	0	0	0	0	0	0	0	0	0	1	0	0	0	0	0	0	0	0
2019	WSB	N	506N	5	6	soy	0	0	0	0	0	0	0	0	0	42	0	0	0	0	3	4	0	11	0	0	0	6	0	0	0	1	0	0	0	1	0	0	0	1	0	0	0	0	0	0	0	0	0
2019	WSB	N	601N	6	1	soy	0	0	0	0	4	0	0	0	0	2	0	3	0	0	2	0	0	3	0	0	0	19	0	0	0	0	0	0	0	1	0	0	14	0	0	0	0	0	0	0	0	0	0
2019	WSB	N	602N	6	2	soy	0	0	0	0	3	0	0	0	0	1	0	0	0	0	0	1	0	1	0	0	0	7	0	0	1	0	0	0	0	0	0	0	13	0	0	0	0	0	0	0	0	0	0
2019	WSB	N	603N	6	3	soy	0	0	0	0	1	0	0	0	0	6	0	1	0	0	0	0	0	0	0	0	0	7	0	0	0	0	0	0	0	0	0	0	0	0	0	0	0	0	0	0	0	0	0
2019	WSB	N	604N	6	4	soy	0	0	0	0	0	0	0	0	0	3	0	0	0	0	1	0	0	0	0	0	0	44	0	0	0	0	0	0	0	0	0	0	0	0	0	0	0	0	0	0	0	0	0
2019	WSB	N	605N	6	5	soy	0	0	0	0	0	0	0	0	0	0	0	0	0	0	0	0	0	3	0	0	0	17	0	0	0	0	1	0	0	2	0	0	0	0	0	0	0	0	0	0	0	0	0
2019	WSB	N	606N	6	6	soy	0	0	0	0	0	0	0	0	0	2	0	0	0	0	0	0	0	0	0	0	0	4	0	0	0	0	0	0	0	4	0	0	0	0	0	0	0	0	0	0	0	0	0
2019	WSB	S	101S	1	1	corn	0	0	0	0	0	0	0	0	0	0	0	0	0	0	0	0	0	0	0	0	0	1	0	0	0	0	0	0	0	0	0	0	7	0	0	0	0	0	0	0	0	0	0
2019	WSB	S	102S	1	2	corn	0	0	0	0	0	0	0	0	0	0	0	0	0	0	0	0	0	0	0	0	0	1	0	0	0	0	0	0	0	0	0	0	0	0	0	0	0	0	0	0	0	0	0
2019	WSB	S	103S	1	3	corn	0	0	0	0	0	0	0	0	0	0	0	0	0	0	0	0	0	0	0	0	0	0	0	0	0	0	0	0	0	0	0	0	0	0	0	0	0	0	0	0	0	0	0
2019	WSB	S	104S	1	4	corn	0	0	0	0	0	0	0	0	0	0	0	0	0	0	0	0	0	0	0	0	0	0	0	0	0	0	0	0	0	0	0	0	0	0	0	0	0	0	0	0	0	0	0
2019	WSB	S	105S	1	5	corn	0	0	0	0	0	0	0	0	0	0	0	0	0	0	0	0	0	0	0	0	0	0	0	0	0	0	0	0	0	0	0	0	0	0	0	0	0	0	0	0	0	0	0
2019	WSB	S	106S	1	6	corn	0	0	0	0	0	0	0	0	0	0	0	0	0	0	0	0	0	0	0	0	0	0	0	0	0	0	0	0	0	0	0	0	2	0	0	0	0	0	0	0	0	0	0
2019	WSB	S	201S	2	1	corn	0	0	0	0	1	0	0	0	0	1	0	3	0	0	0	0	0	0	0	0	0	3	0	0	0	0	0	0	0	0	0	0	0	0	0	0	0	0	0	0	0	0	0
2019	WSB	S	202S	2	2	corn	0	0	0	0	0	0	0	0	0	2	0	0	0	0	2	0	0	0	0	0	0	3	0	0	0	0	0	0	0	0	0	0	1	0	0	0	0	0	0	0	0	0	0
2019	WSB	S	203S	2	3	corn	0	0	0	0	0	0	0	0	0	5	0	0	0	0	0	0	0	0	0	0	0	0	0	0	0	0	0	0	0	0	0	0	0	0	0	0	0	0	0	0	0	0	0
2019	WSB	S	204S	2	4	corn	0	0	0	0	0	0	0	0	0	0	0	0	0	0	0	0	0	0	0	0	0	0	0	0	0	0	0	0	0	0	0	0	0	0	0	0	0	0	0	0	0	0	0
2019	WSB	S	205S	2	5	corn	0	0	0	0	0	0	0	0	0	0	0	0	0	0	0	0	0	0	0	0	0	0	0	0	0	1	0	0	0	0	0	0	0	0	0	0	0	0	0	0	0	0	0
2019	WSB	S	206S	2	6	corn	0	0	0	0	0	0	0	0	0	0	0	0	0	0	0	0	0	0	0	0	0	0	0	0	0	0	0	0	0	0	0	0	0	0	0	0	0	0	0	0	0	0	0
2019	WSB	S	301S	3	1	corn	0	0	0	0	0	0	0	0	0	0	0	0	0	0	0	0	0	0	0	0	0	0	0	0	0	0	0	0	0	0	0	0	0	0	0	0	0	0	0	0	0	0	0
2019	WSB	S	302S	3	2	corn	0	0	0	0	0	0	0	0	0	0	0	1	0	0	0	0	0	0	0	0	0	0	0	0	0	0	0	0	0	0	0	0	0	0	0	0	0	0	0	0	0	0	0
2019	WSB	S	303S	3	3	corn	0	0	0	0	0	0	0	0	0	0	0	0	0	0	0	0	0	0	0	0	0	0	0	0	0	0	0	0	0	0	0	0	0	0	0	0	0	0	0	0	0	0	0
2019	WSB	S	304S	3	4	corn	0	0	0	0	0	0	0	0	0	0	0	0	0	0	0	0	0	0	0	0	0	3	0	0	0	0	0	0	0	0	0	0	0	0	0	0	0	0	0	0	0	0	0
2019	WSB	S	305S	3	5	corn	0	0	0	0	0	0	0	0	0	0	0	0	0	0	0	0	0	0	0	0	0	3	0	0	0	0	0	0	0	0	0	0	0	0	0	0	0	0	0	0	0	0	0
2019	WSB	S	306S	3	6	corn	0	0	0	0	0	0	0	0	0	0	0	0	0	0	0	0	0	0	0	0	0	0	0	0	0	0	0	0	0	0	0	0	0	0	0	0	0	0	0	0	0	0	0
2019	WSB	S	401S	4	1	corn	0	0	0	0	0	0	0	0	0	0	0	1	0	0	0	0	0	0	0	0	0	0	0	0	0	0	0	0	0	0	0	0	0	0	0	0	0	0	0	0	0	0	0
2019	WSB	S	402S	4	2	corn	0	0	0	0	0	0	0	0	0	0	0	0	0	0	0	0	0	0	0	0	0	0	0	0	0	0	0	0	0	0	0	0	0	0	0	0	0	0	0	0	0	0	0
2019	WSB	S	403S	4	3	corn	0	0	0	0	0	0	0	0	0	0	0	0	0	0	0	0	0	0	0	0	0	2	0	0	0	0	0	0	0	0	0	0	0	0	0	0	0	0	0	0	0	0	0
2019	WSB	S	404S	4	4	corn	0	0	0	0	0	0	0	0	0	0	0	1	0	0	0	0	0	0	0	0	0	0	0	0	0	0	0	0	0	0	0	0	0	0	2	0	0	0	0	0	0	0	0
2019	WSB	S	405S	4	5	corn	0	0	0	0	0	0	0	0	0	0	0	1	0	0	0	0	0	0	0	0	0	6	0	0	0	0	0	0	0	0	0	0	1	0	0	0	0	0	0	0	0	0	0
2019	WSB	S	406S	4	6	corn	0	0	0	0	0	0	0	0	0	0	0	0	0	0	0	1	0	0	0	0	0	0	0	0	0	0	0	0	0	0	0	0	0	0	0	0	0	0	0	0	0	0	0
2019	WSB	S	501S	5	1	corn	0	0	0	0	0	0	0	0	0	0	0	1	0	0	0	0	0	0	0	0	0	0	0	0	0	0	0	0	0	0	0	0	0	0	0	0	0	0	0	0	0	0	0
2019	WSB	S	502S	5	2	corn	0	0	0	0	0	0	0	0	0	0	0	2	0	0	0	0	0	0	0	0	0	7	0	0	0	0	0	0	0	0	0	0	0	0	0	0	0	0	0	0	0	0	0
2019	WSB	S	503S	5	3	corn	0	0	0	0	1	0	0	0	0	0	0	3	0	0	0	1	0	0	0	0	0	0	0	0	0	0	0	0	0	0	0	0	0	0	0	0	0	0	0	0	0	0	0
2019	WSB	S	504S	5	4	corn	0	0	0	0	0	0	0	0	0	0	0	0	0	0	0	0	0	0	0	0	0	1	0	0	0	0	0	0	0	0	0	0	0	0	0	0	0	0	0	0	0	0	0
2019	WSB	S	505S	5	5	corn	0	0	0	0	0	0	0	0	0	0	0	2	0	0	0	0	0	0	0	0	0	3	0	0	0	0	0	0	0	0	0	0	0	0	0	0	0	0	0	0	0	0	0
2019	WSB	S	506S	5	6	corn	0	0	0	0	0	0	0	0	0	0	0	1	0	0	0	0	0	0	0	0	0	0	0	0	0	0	0	0	0	0	0	0	0	0	0	0	0	0	0	0	0	0	0
2019	WSB	S	601S	6	1	corn	0	0	0	0	0	0	0	0	0	0	0	0	0	0	0	0	0	0	0	0	0	0	0	0	0	0	0	0	0	0	0	0	0	0	0	0	0	0	0	0	0	0	0
2019	WSB	S	602S	6	2	corn	0	0	0	0	0	0	0	0	0	0	0	1	0	0	0	0	0	0	0	0	0	0	0	0	0	0	0	0	0	0	0	0	0	0	0	0	0	0	0	0	0	0	0
2019	WSB	S	603S	6	3	corn	0	0	1	0	0	0	0	0	1	0	0	1	0	0	0	0	0	0	0	0	0	3	0	0	0	1	0	0	0	0	0	0	2	0	0	0	0	0	0	0	0	0	0
2019	WSB	S	604S	6	4	corn	0	0	1	0	0	0	0	0	0	0	0	0	0	0	0	0	0	0	0	0	0	2	0	0	0	6	0	0	0	0	0	0	0	0	0	0	0	0	0	0	0	0	0
2019	WSB	S	605S	6	5	corn	0	0	0	0	0	0	0	0	0	0	0	1	0	0	0	0	0	0	0	0	0	0	0	0	0	0	0	0	0	0	0	0	1	0	0	0	0	0	0	0	0	0	0
2019	WSB	S	606S	6	6	corn	0	0	0	0	0	0	0	0	0	0	0	1	0	0	0	0	0	0	0	0	0	1	0	0	0	5	0	0	0	0	0	0	0	0	0	0	0	0	0	0	0	0	0
[truncated: 15 more columns]

## Sheet: Abbreviation list
Abbreviation	Common_name	Species_name	Forb_or_grass			Notes:
Abt	velvetleaf	Abutilon theophrasti	F				This datasheet includes all 2017, 2018, and 2019 weed seed bank data (count of weeds that germinated from soil samples) AND 2017, 2018, 2019 August weed biomass (three 1/4 m2 quadrats per plot) from the Smickings project
Ac	Acalypha	Acalypha spp.	F
Acm	yarrow	Achillea millefolium	F
Am	Ragweed	Ambrosia spp.	F
Amr	redroot pigweed	Amaranthus retroflexus	F			2020-07-09	In August 2017, grasses were all counted as one group (KAP)
Ar	burdock	Arctium spp.	F	(+ "wild squash" from GH)			There are still some unknowns (Skunk mint? UNK 1) that may be good to sort out, but biomass is so low..
Ase	white heath aster	Aster pilosus	F
Bif	beggars tickseed	Bidens frondosa	F				for very small samples - used <0.01 g, this was adjusted to 0.01 in data for analysis
Br	mustard	Brassica spp.	F				What do missing values represent?
Cabp	shepherd's purse	Capsella bursa-pastoris	F	(+ sawtooth rosette)
Cah	hairy bittercress	Cardamine hirsuta	F
Ce	mouseear chickweed	Cerastium spp.	F
Cha	lambsquarter	Chenopodium album	F
Ci	Thistle	Cirsium spp.	F
Coa	bindweed	Convolvulus arvensis	F
Coc	marestail	Conyza canadensis	F
Cyr	nutsedge	Cyperus rotundus	G
Dii	smooth crabgrass	Digitaria ischaemum	G
Dis	large crabgrass	Digitaria sanguinalis	G
Ec	barnyard grass	Echinochloa spp.	G
Er	erigeron	erigeron spp.	F
Eum	prostrate spurge	Euphorbia maculata	F
Laa	henbit	Lamium amplexicaule	F
Loi	Indian Tobacco	Lobelia inflata	F	(+serrated round rosette)
Mel	black medic	Medicago lupulina	F
Mov	carpetweed	Mollugo verticillata	F
Oxs	yellow woodsorrel	Oxalis stricta	F
Pac	witchgrass	Panicum capillare	G
Pand	fall panicum	Panicum dichotomiflorum	G
Pasd	dallis grass	Paspalum dilitatum	G
Pav	switchgrass	Panicum virgatum	G
Ph	Ground Cherry	Physalis spp.	F
Phs	Groundcherry	Physalis subglabrata
Plm	broadleaf plantain	Plantago major	F
Po	buckwheat	polygonum spp.	F
Poo	purslane	Portulaca oleracea	F
Pos	Cinquefoil	Potentilla simplex	F
Pr	healall	Prunella spp.	F
Raj	knotweed	Reynoutria japonica	F
Rua	common sorrel / dock	Rumex acetosa?	F	(+ UNK1 from GH)
Sef	giant foxtail	Setaria faberi	G
Sep	yellow foxtail	Setaria pumila	G
Sev	green foxtail	Setaria viridis	G
SM	Skunk Mint	????	F
So	goldenrod	Solidago spp.	F	(+hairy round rosette)
Sob	shattercane	Sorghum bicolor	G
Sop	eastern black nightshade	Solanum ptychanthum	F
Stm	other chickweed	Stellaria media	F
Ta	dandelion	Taraxacum spp.	F
Tha	field pennycress	Thlaspi arvense	F
Tr	clover	Trifolium spp.	F
UNK1	Unknown1 from field (2017)	???	F
Ve	speedwell	Veronica spp	F
Vi	viola	viola spp.	F
