# Supplementary material for: Insecticides may facilitate the escape of weeds from biological control
Source: PeerJ. 2025 Jan 13;13:e18597. doi: 10.7717/peerj.18597 (PMC11737330; doi:10.7717/peerj.18597)
Supplement: Supplemental Information 9 — Predator data for Results 4 and Figures 6, S6 and S7. [file peerj-13-18597-s009.xlsx]

## Sheet: Sheet1
Year	Date	Sample period	Field	Crop	Block	Plot	Plot_ID	row	carabids	rove	other_beetles	spiders	juvenile spiders	harvestmen	millipedes	centipedes	ants	total	checked	Notes
2017	2017-06-27	1	N	soy	1	1	101N	5	0	2	0	5	1	0	1	0	10	19	Y
2017	2017-06-27	1	N	soy	1	1	101N	8	1	0	1	4	0	5	2	0	4	17	Y
2017	2017-06-27	1	N	soy	1	2	102N	5	0	0	0	4	0	0	1	0	4	9	Y
2017	2017-06-27	1	N	soy	1	2	102N	8	0	0	0	7	0	0	5	0	30	42	Y
2017	2017-06-27	1	N	soy	1	3	103N	5	0	0	0	4	0	3	4	0	7	18	Y
2017	2017-06-27	1	N	soy	1	3	103N	8	2	1	0	4	0	1	0	0	5	13	Y
2017	2017-06-27	1	N	soy	1	4	104N	5	0	0	0	2	0	2	0	0	7	11	Y
2017	2017-06-27	1	N	soy	1	4	104N	8	1	0	2	1	0	2	3	1	7	17	Y
2017	2017-06-27	1	N	soy	1	5	105N	5	1	0	0	5	0	0	2	0	6	14	Y
2017	2017-06-27	1	N	soy	1	5	105N	8	0	0	0	2	0	0	3	0	3	8	Y
2017	2017-06-27	1	N	soy	1	6	106N	5	2	0	1	45	0	9	1	0	14	72	Y
2017	2017-06-27	1	N	soy	1	6	106N	8	0	1	0	5	0	1	1	0	8	16	Y
2017	2017-06-27	1	N	soy	2	1	201N	5	1	0	0	4	0	4	0	0	8	17	Y
2017	2017-06-27	1	N	soy	2	1	201N	8	0	0	0	1	0	1	3	1	11	17	Y
2017	2017-06-27	1	N	soy	2	2	202N	5	2	0	0	1	0	4	3	0	1	11	Y
2017	2017-06-27	1	N	soy	2	2	202N	8	0	0	0	3	0	0	0	0	5	8	Y
2017	2017-06-27	1	N	soy	2	3	203N	5	0	4	0	3	0	0	1	1	16	25	Y
2017	2017-06-27	1	N	soy	2	3	203N	8	3	2	2	2	0	0	2	0	11	22	Y
2017	2017-06-27	1	N	soy	2	4	204N	5	0	0	0	1	0	2	5	0	4	12	Y
2017	2017-06-27	1	N	soy	2	4	204N	8	1	0	0	4	0	1	7	1	4	18	Y
2017	2017-06-27	1	N	soy	2	5	205N	5	1	1	1	6	0	0	3	0	9	21	Y
2017	2017-06-27	1	N	soy	2	5	205N	8	0	2	0	0	0	3	4	0	8	17	Y
2017	2017-06-27	1	N	soy	2	6	206N	5	1	2	5	5	0	6	1	0	15	35	Y
2017	2017-06-27	1	N	soy	2	6	206N	8	0	1	0	0	0	0	1	0	19	21	Y
2017	2017-06-27	1	N	soy	3	1	301N	5	1	0	1	4	0	0	2	2	18	28	Y
2017	2017-06-27	1	N	soy	3	1	301N	8	0	0	0	3	0	1	2	0	7	13	Y
2017	2017-06-27	1	N	soy	3	2	302N	5	0	2	0	8	0	1	6	0	30	47	Y
2017	2017-06-27	1	N	soy	3	2	302N	8	1	0	0	2	0	3	4	0	4	14	Y
2017	2017-06-27	1	N	soy	3	3	303N	5	0	3	0	1	0	0	5	0	29	38	Y
2017	2017-06-27	1	N	soy	3	3	303N	8	3	0	1	9	0	2	2	0	7	24	Y
2017	2017-06-27	1	N	soy	3	4	304N	5	0	1	0	3	0	1	1	0	5	11	Y
2017	2017-06-27	1	N	soy	3	4	304N	8	0	1	0	7	0	1	1	0	3	13	Y
2017	2017-06-27	1	N	soy	3	5	305N	5	1	0	2	2	0	2	3	0	21	31	Y
2017	2017-06-27	1	N	soy	3	5	305N	8	0	2	0	4	0	1	0	1	16	24	Y
2017	2017-06-27	1	N	soy	3	6	306N	5	0	0	1	2	0	0	1	0	1	5	Y
2017	2017-06-27	1	N	soy	3	6	306N	8	1	1	0	10	0	1	0	0	14	27	Y
2017	2017-06-27	1	N	soy	4	1	401N	5	3	0	0	4	0	2	4	1	12	26	Y
2017	2017-06-27	1	N	soy	4	1	401N	8	1	1	0	4	0	0	1	0	12	19	Y
2017	2017-06-27	1	N	soy	4	2	402N	5	0	0	0	1	0	0	7	0	2	10	Y
2017	2017-06-27	1	N	soy	4	2	402N	8	2	0	0	5	0	1	7	1	15	31	Y
2017	2017-06-27	1	N	soy	4	3	403N	5	0	0	0	0	0	1	1	0	4	6	Y
2017	2017-06-27	1	N	soy	4	3	403N	8	1	0	2	1	0	1	6	0	0	11	Y
2017	2017-06-27	1	N	soy	4	4	404N	5	0	0	2	0	0	2	13	0	5	22	Y
2017	2017-06-27	1	N	soy	4	4	404N	8	2	0	1	4	0	5	18	0	5	35	Y
2017	2017-06-27	1	N	soy	4	5	405N	5	3	0	0	1	0	0	17	0	13	34	Y
2017	2017-06-27	1	N	soy	4	5	405N	8	2	0	1	2	0	3	10	0	8	26	Y
2017	2017-06-27	1	N	soy	4	6	406N	5	4	1	4	3	0	0	15	0	15	42	Y
2017	2017-06-27	1	N	soy	4	6	406N	8	1	0	0	0	0	1	22	0	4	28	Y
2017	2017-06-27	1	N	soy	5	1	501N	5	0	1	0	6	0	1	4	0	46	58	Y
2017	2017-06-27	1	N	soy	5	1	501N	8	2	0	0	1	0	1	1	0	8	13	Y
2017	2017-06-27	1	N	soy	5	2	502N	5	2	0	3	1	0	1	7	0	9	23	Y
2017	2017-06-27	1	N	soy	5	2	502N	8	1	1	1	2	0	0	5	0	31	41	Y
2017	2017-06-27	1	N	soy	5	3	503N	5	0	0	0	2	0	1	12	0	4	19	Y
2017	2017-06-27	1	N	soy	5	3	503N	8	2	0	1	0	0	0	7	0	11	21	Y
2017	2017-06-27	1	N	soy	5	4	504N	5	3	0	2	2	0	3	20	0	4	34	Y
2017	2017-06-27	1	N	soy	5	4	504N	8	0	1	0	1	0	0	38	0	5	45	Y
2017	2017-06-27	1	N	soy	5	5	505N	5	0	1	1	3	0	3	19	0	5	32	Y
2017	2017-06-27	1	N	soy	5	5	505N	8	0	2	0	1	0	1	32	0	9	45	Y
2017	2017-06-27	1	N	soy	5	6	506N	5	0	0	1	0	0	1	3	0	13	18	Y
2017	2017-06-27	1	N	soy	5	6	506N	8	4	0	0	0	0	3	4	0	4	15	Y
2017	2017-06-27	1	N	soy	6	1	601N	5	1	1	1	4	0	0	1	0	15	23	Y
2017	2017-06-27	1	N	soy	6	1	601N	8	6	0	1	7	0	3	3	0	22	42	Y
2017	2017-06-27	1	N	soy	6	2	602N	5	1	0	0	2	0	1	4	0	11	19	Y
2017	2017-06-27	1	N	soy	6	2	602N	8	3	0	0	6	0	1	1	0	15	26	Y
2017	2017-06-27	1	N	soy	6	3	603N	5	1	1	0	4	0	1	12	0	17	36	Y
2017	2017-06-27	1	N	soy	6	3	603N	8	2	0	0	1	0	0	3	0	4	10	Y
2017	2017-06-27	1	N	soy	6	4	604N	5	0	0	2	2	0	1	21	1	9	36	Y
2017	2017-06-27	1	N	soy	6	4	604N	8	1	0	2	1	0	4	8	0	14	30	Y
2017	2017-06-27	1	N	soy	6	5	605N	5	2	2	0	0	0	4	29	0	15	52	Y
2017	2017-06-27	1	N	soy	6	5	605N	8	1	0	3	2	0	1	28	0	13	48	Y
2017	2017-06-27	1	N	soy	6	6	606N	5	5	0	2	2	0	0	0	0	5	14	Y
2017	2017-06-27	1	N	soy	6	6	606N	8	0	0	2	2	0	0	12	0	17	33	Y
2017	2017-09-22	2	N	soy	1	1	101N	5	12	0	0	0	0	3	0	0	2	17	Y
2017	2017-09-22	2	N	soy	1	1	101N	8	30	0	0	0	0	1	1	0	0	32	Y
2017	2017-09-22	2	N	soy	1	2	102N	5	5	0	0	0	0	2	1	0	1	9	Y
2017	2017-09-22	2	N	soy	1	2	102N	8	5	0	0	0	0	1	0	0	0	6	Y
2017	2017-09-22	2	N	soy	1	3	103N	5	22	0	0	0	0	0	4	0	14	40	Y
2017	2017-09-22	2	N	soy	1	3	103N	8	9	1	0	0	0	0	1	0	4	15	Y
2017	2017-09-22	2	N	soy	1	4	104N	5	15	0	0	0	0	0	0	0	1	16	Y
2017	2017-09-22	2	N	soy	1	4	104N	8	7	0	0	0	0	0	3	0	0	10	Y
2017	2017-09-22	2	N	soy	1	5	105N	5	4	1	2	0	0	0	0	0	3	10	Y
2017	2017-09-22	2	N	soy	1	5	105N	8	8	0	0	0	0	0	2	0	0	10	Y
2017	2017-09-22	2	N	soy	1	6	106N	5	7	0	0	0	0	1	2	0	0	10	Y
2017	2017-09-22	2	N	soy	1	6	106N	8	4	0	0	0	0	2	1	1	3	11	Y
2017	2017-09-22	2	N	soy	2	1	201N	5	6	1	0	0	0	2	2	0	2	13	Y
2017	2017-09-22	2	N	soy	2	1	201N	8	6	0	0	0	0	3	0	0	2	11	Y
2017	2017-09-22	2	N	soy	2	2	202N	5	27	0	0	1	0	2	1	0	1	32	Y
2017	2017-09-22	2	N	soy	2	2	202N	8	2	0	0	0	0	0	2	0	5	9	Y
2017	2017-09-22	2	N	soy	2	3	203N	5	6	0	0	0	0	0	3	0	5	14	Y
2017	2017-09-22	2	N	soy	2	3	203N	8	1	0	0	0	0	1	1	0	0	3	Y
2017	2017-09-22	2	N	soy	2	4	204N	5	2	0	0	0	0	5	1	0	4	12	Y
2017	2017-09-22	2	N	soy	2	4	204N	8	1	0	0	0	0	0	2	0	2	5	Y
2017	2017-09-22	2	N	soy	2	5	205N	5	1	0	0	0	0	0	2	0	0	3	Y
2017	2017-09-22	2	N	soy	2	5	205N	8	1	0	0	0	0	0	1	0	2	4	Y
2017	2017-09-22	2	N	soy	2	6	206N	5	2	1	0	0	0	2	6	0	3	14	Y
2017	2017-09-22	2	N	soy	2	6	206N	8	1	0	0	0	0	0	6	0	5	12	Y
2017	2017-09-22	2	N	soy	3	1	301N	5	9	0	0	0	0	2	0	0	6	17	Y
2017	2017-09-22	2	N	soy	3	1	301N	8	7	0	0	0	0	0	2	0	6	15	Y
2017	2017-09-22	2	N	soy	3	2	302N	5	10	0	0	0	0	9	4	0	3	26	Y
2017	2017-09-22	2	N	soy	3	2	302N	8	2	0	0	0	0	7	0	0	4	13	Y
2017	2017-09-22	2	N	soy	3	3	303N	5	10	0	0	0	0	0	3	0	3	16	Y
2017	2017-09-22	2	N	soy	3	3	303N	8	4	0	1	1	0	2	0	0	2	10	Y
2017	2017-09-22	2	N	soy	3	4	304N	5	3	0	0	0	0	4	8	0	4	19	Y
2017	2017-09-22	2	N	soy	3	4	304N	8	1	0	0	0	0	0	4	0	2	7	Y
2017	2017-09-22	2	N	soy	3	5	305N	5	0	0	1	0	0	3	1	0	0	5	Y
2017	2017-09-22	2	N	soy	3	5	305N	8	7	0	1	1	0	0	1	0	2	12	Y
2017	2017-09-22	2	N	soy	3	6	306N	5	4	0	0	0	0	2	3	0	2	11	Y
2017	2017-09-22	2	N	soy	3	6	306N	8	19	0	0	0	0	0	0	0	3	22	Y
2017	2017-09-22	2	N	soy	4	1	401N	5	19	1	0	0	0	0	2	0	1	23	Y
2017	2017-09-22	2	N	soy	4	1	401N	8	0	0	0	0	0	0	0	0	1	1	Y
2017	2017-09-22	2	N	soy	4	2	402N	5	1	0	0	0	0	1	0	0	4	6	Y
2017	2017-09-22	2	N	soy	4	2	402N	8	3	0	3	0	0	0	3	0	4	13	Y
2017	2017-09-22	2	N	soy	4	3	403N	5	2	0	0	0	0	2	1	0	0	5	Y
2017	2017-09-22	2	N	soy	4	3	403N	8	1	0	1	0	0	1	0	1	4	8	Y
2017	2017-09-22	2	N	soy	4	4	404N	5	2	0	0	0	0	5	1	0	3	11	Y
2017	2017-09-22	2	N	soy	4	4	404N	8	2	0	0	0	0	4	5	0	0	11	Y
2017	2017-09-22	2	N	soy	4	5	405N	5	5	0	0	0	0	1	1	0	0	7	Y
2017	2017-09-22	2	N	soy	4	5	405N	8	0	0	0	0	0	3	0	0	8	11	Y
2017	2017-09-22	2	N	soy	4	6	406N	5	0	0	0	0	0	2	2	0	4	8	Y
2017	2017-09-22	2	N	soy	4	6	406N	8	0	0	0	0	0	0	0	0	2	2	Y
2017	2017-09-22	2	N	soy	5	1	501N	5	2	0	0	2	0	1	0	0	9	14	Y
2017	2017-09-22	2	N	soy	5	1	501N	8	1	0	0	0	0	0	0	0	19	20	Y
2017	2017-09-22	2	N	soy	5	2	502N	5	2	1	0	0	0	0	2	0	5	10	Y
2017	2017-09-22	2	N	soy	5	2	502N	8	2	0	0	0	0	0	1	0	2	5	Y
2017	2017-09-22	2	N	soy	5	3	503N	5	0	0	0	0	0	2	1	0	3	6	Y
2017	2017-09-22	2	N	soy	5	3	503N	8	1	0	0	0	0	1	1	0	5	8	Y
2017	2017-09-22	2	N	soy	5	4	504N	5	0	0	0	0	0	1	2	0	0	3	Y
2017	2017-09-22	2	N	soy	5	4	504N	8	1	0	1	0	0	2	0	0	6	10	Y
2017	2017-09-22	2	N	soy	5	5	505N	5	0	0	0	0	0	0	1	0	1	2	Y
2017	2017-09-22	2	N	soy	5	5	505N	8	0	2	0	1	0	1	0	0	3	7	Y
2017	2017-09-22	2	N	soy	5	6	506N	5	2	0	0	0	0	0	0	0	0	2	Y
2017	2017-09-22	2	N	soy	5	6	506N	8	1	0	0	0	0	2	1	0	1	5	Y
2017	2017-09-22	2	N	soy	6	1	601N	5	0	0	0	0	0	0	0	0	5	5	Y
2017	2017-09-22	2	N	soy	6	1	601N	8	1	0	0	1	0	1	0	0	0	3	Y
2017	2017-09-22	2	N	soy	6	2	602N	5	1	0	0	0	0	0	0	0	2	3	Y
2017	2017-09-22	2	N	soy	6	2	602N	8	0	0	0	0	0	0	0	0	9	9	Y
2017	2017-09-22	2	N	soy	6	3	603N	5	2	0	0	0	0	1	0	0	1	4	Y
2017	2017-09-22	2	N	soy	6	3	603N	8	2	0	0	0	0	0	0	0	6	8	Y
2017	2017-09-22	2	N	soy	6	4	604N	5	4	0	0	0	0	1	0	0	1	6	Y
2017	2017-09-22	2	N	soy	6	4	604N	8	10	0	0	0	0	0	0	0	0	10	Y
2017	2017-09-22	2	N	soy	6	5	605N	5	0	0	0	1	0	0	0	0	2	3	Y
2017	2017-09-22	2	N	soy	6	5	605N	8	1	1	2	1	0	1	0	0	3	9	Y
2017	2017-09-22	2	N	soy	6	6	606N	5	5	0	0	0	0	2	0	0	2	9	Y
2017	2017-09-22	2	N	soy	6	6	606N	8	0	0	0	0	0	0	1	0	2	3	Y
2017	2017-06-13	1	S	corn	1	1	101S	5	1	4	0	1	0	2	0	0	0	8	Y
2017	2017-06-13	1	S	corn	1	1	101S	8	0	1	2	8	0	0	5	0	7	23	Y
2017	2017-06-13	1	S	corn	1	2	102S	5	1	0	0	2	0	8	1	0	3	15	Y
2017	2017-06-13	1	S	corn	1	2	102S	8	0	1	2	8	0	0	5	0	4	20	Y
2017	2017-06-13	1	S	corn	1	3	103S	5	1	0	4	3	0	3	6	0	10	27	Y
2017	2017-06-13	1	S	corn	1	3	103S	8	0	2	3	4	0	1	2	0	2	14	Y
2017	2017-06-13	1	S	corn	1	4	104S	5	1	0	2	6	0	1	2	0	7	19	Y
2017	2017-06-13	1	S	corn	1	4	104S	8	0	2	0	0	0	4	1	0	4	11	Y
2017	2017-06-13	1	S	corn	1	5	105S	5	0	1	1	2	0	3	1	0	7	15	Y
2017	2017-06-13	1	S	corn	1	5	105S	8	0	2	2	1	0	1	0	0	1	7	Y
2017	2017-06-13	1	S	corn	1	6	106S	5	0	0	1	3	0	2	4	0	6	16	Y
2017	2017-06-13	1	S	corn	1	6	106S	8	1	1	2	3	0	3	2	0	2	14	Y
2017	2017-06-13	1	S	corn	2	1	201S	5	1	1	0	3	0	0	1	0	0	6	Y
2017	2017-06-13	1	S	corn	2	1	201S	8	1	2	2	3	0	0	0	0	1	9	Y
2017	2017-06-13	1	S	corn	2	2	202S	5	0	1	0	4	0	2	1	0	2	10	Y
2017	2017-06-13	1	S	corn	2	2	202S	8	0	0	0	3	0	2	1	0	3	9	Y
2017	2017-06-13	1	S	corn	2	3	203S	5	0	0	0	2	0	2	0	0	7	11	Y
2017	2017-06-13	1	S	corn	2	3	203S	8	2	0	2	1	0	1	8	0	10	24	Y
2017	2017-06-13	1	S	corn	2	4	204S	5	1	0	1	1	0	3	2	0	1	9	Y
2017	2017-06-13	1	S	corn	2	4	204S	8	0	0	2	0	0	1	1	0	4	8	Y
2017	2017-06-13	1	S	corn	2	5	205S	5	0	1	1	4	0	0	0	0	3	9	Y
2017	2017-06-13	1	S	corn	2	5	205S	8	0	3	1	3	0	0	0	0	1	8	Y
2017	2017-06-13	1	S	corn	2	6	206S	5	0	0	0	2	0	1	0	0	12	15	Y
2017	2017-06-13	1	S	corn	2	6	206S	8	0	2	2	5	0	2	0	0	3	14	Y
2017	2017-06-13	1	S	corn	3	1	301S	5	2	2	0	3	0	3	1	0	4	15	Y
2017	2017-06-13	1	S	corn	3	1	301S	8	0	0	0	5	0	1	0	0	0	6	Y
2017	2017-06-13	1	S	corn	3	2	302S	5	0	0	0	2	0	0	2	0	5	9	Y
2017	2017-06-13	1	S	corn	3	2	302S	8	2	0	3	3	0	3	0	0	4	15	Y
2017	2017-06-13	1	S	corn	3	3	303S	5	1	2	2	1	0	5	1	0	2	14	Y
2017	2017-06-13	1	S	corn	3	3	303S	8	1	0	0	1	0	0	0	0	0	2	Y
2017	2017-06-13	1	S	corn	3	4	304S	5	1	0	2	3	0	3	2	0	4	15	Y
2017	2017-06-13	1	S	corn	3	4	304S	8	1	0	2	1	0	0	44	0	6	54	Y
2017	2017-06-13	1	S	corn	3	5	305S	5	2	0	8	3	0	0	9	0	6	28	Y
2017	2017-06-13	1	S	corn	3	5	305S	8	0	0	0	2	0	3	12	0	24	41	Y
2017	2017-06-13	1	S	corn	3	6	306S	5	1	2	0	5	0	0	21	0	1	30	Y
2017	2017-06-13	1	S	corn	3	6	306S	8	0	0	1	1	0	1	5	0	3	11	Y
2017	2017-06-13	1	S	corn	4	1	401S	5	2	1	1	6	0	0	9	0	2	21	Y
2017	2017-06-13	1	S	corn	4	1	401S	8	2	1	1	3	0	4	5	0	5	21	Y
2017	2017-06-13	1	S	corn	4	2	402S	5	0	0	0	1	0	1	0	0	3	5	Y
2017	2017-06-13	1	S	corn	4	2	402S	8	2	0	1	1	0	0	4	0	2	10	Y
2017	2017-06-13	1	S	corn	4	3	403S	5	0	2	0	4	0	1	11	0	4	22	Y
2017	2017-06-13	1	S	corn	4	3	403S	8	0	0	0	3	0	2	7	0	6	18	Y
2017	2017-06-13	1	S	corn	4	4	404S	5	1	0	1	2	0	2	14	0	3	23	Y
2017	2017-06-13	1	S	corn	4	4	404S	8	1	0	0	3	0	0	1	0	4	9	Y
2017	2017-06-13	1	S	corn	4	5	405S	5	2	0	1	0	0	0	14	0	4	21	Y
2017	2017-06-13	1	S	corn	4	5	405S	8	0	1	3	2	0	1	4	0	5	16	Y
2017	2017-06-13	1	S	corn	4	6	406S	5	1	1	1	0	0	0	12	0	2	17	Y
2017	2017-06-13	1	S	corn	4	6	406S	8	0	1	3	3	0	1	6	0	3	17	Y
2017	2017-06-13	1	S	corn	5	1	501S	5	1	3	2	4	0	2	4	0	12	28	Y
2017	2017-06-13	1	S	corn	5	1	501S	8	3	0	2	4	0	0	17	0	8	34	Y
2017	2017-06-13	1	S	corn	5	2	502S	5	1	2	2	7	0	3	3	0	4	22	Y
2017	2017-06-13	1	S	corn	5	2	502S	8	4	0	0	3	0	0	8	0	2	17	Y
2017	2017-06-13	1	S	corn	5	3	503S	5	0	2	4	4	0	1	2	0	4	17	Y
2017	2017-06-13	1	S	corn	5	3	503S	8	1	1	1	1	0	0	3	0	7	14	Y
2017	2017-06-13	1	S	corn	5	4	504S	5	1	0	0	6	0	2	9	0	3	21	Y
2017	2017-06-13	1	S	corn	5	4	504S	8	0	1	0	7	0	2	5	0	1	16	Y
2017	2017-06-13	1	S	corn	5	5	505S	5	0	2	2	3	0	3	5	0	1	16	Y
2017	2017-06-13	1	S	corn	5	5	505S	8	1	2	2	0	0	3	4	0	4	16	Y
2017	2017-06-13	1	S	corn	5	6	506S	5	0	2	1	3	0	0	8	0	4	18	Y
2017	2017-06-13	1	S	corn	5	6	506S	8	0	2	1	5	0	2	14	0	11	35	Y
2017	2017-06-13	1	S	corn	6	1	601S	5	4	2	1	4	0	1	1	0	5	18	Y
2017	2017-06-13	1	S	corn	6	1	601S	8	3	0	2	3	0	1	0	0	2	11	Y
2017	2017-06-13	1	S	corn	6	2	602S	5	0	0	2	6	0	0	0	0	7	15	Y
2017	2017-06-13	1	S	corn	6	2	602S	8	2	3	1	11	0	1	2	0	5	25	Y
2017	2017-06-13	1	S	corn	6	3	603S	5	0	1	0	5	0	0	0	0	3	9	Y
2017	2017-06-13	1	S	corn	6	3	603S	8	2	4	5	5	0	0	0	0	3	19	Y
2017	2017-06-13	1	S	corn	6	4	604S	5	4	4	6	7	0	1	0	0	7	29	Y
2017	2017-06-13	1	S	corn	6	4	604S	8	11	3	6	12	0	6	1	0	24	63	Y
2017	2017-06-13	1	S	corn	6	5	605S	5	10	3	10	13	0	0	1	0	9	46	Y
2017	2017-06-13	1	S	corn	6	5	605S	8	6	6	6	9	60	1	0	0	1	89	Y
2017	2017-06-13	1	S	corn	6	6	606S	5	1	3	3	8	0	0	1	0	7	23	Y
2017	2017-06-13	1	S	corn	6	6	606S	8	7	4	5	7	0	0	0	0	11	34	Y
2017	2017-09-04	2	S	corn	1	1	101S	5	17	0	2	0	0	0	2	0	1	22	Y
2017	2017-09-04	2	S	corn	1	1	101S	8	10	0	0	0	0	0	1	0	3	14	Y
2017	2017-09-04	2	S	corn	1	2	102S	5	0	1	1	0	0	3	0	0	0	5	Y
2017	2017-09-04	2	S	corn	1	2	102S	8	1	0	0	1	0	1	1	0	0	4	Y
2017	2017-09-04	2	S	corn	1	3	103S	5	0	0	0	0	0	0	0	1	2	3	Y	PITFALL NOT WELL SET INTO GROUND
2017	2017-09-04	2	S	corn	1	3	103S	8	0	1	0	0	0	1	0	0	2	4	Y	PITFALL NOT WELL SET INTO GROUND
2017	2017-09-04	2	S	corn	1	4	104S	5	6	0	0	0	0	0	1	0	0	7	Y
2017	2017-09-04	2	S	corn	1	4	104S	8	0	0	0	0	0	0	0	0	2	2	Y
2017	2017-09-04	2	S	corn	1	5	105S	5	0	0	0	0	0	0	0	0	0	0	Y
2017	2017-09-04	2	S	corn	1	5	105S	8	1	0	0	0	0	0	2	0	0	3	Y	PITFALL NOT WELL SET INTO GROUND
2017	2017-09-04	2	S	corn	1	6	106S	5	5	0	0	0	0	0	0	0	0	5	Y
2017	2017-09-04	2	S	corn	1	6	106S	8	4	0	0	0	0	0	1	0	0	5	Y
2017	2017-09-04	2	S	corn	2	1	201S	5	0	0	0	0	0	0	5	0	0	5	Y
2017	2017-09-04	2	S	corn	2	1	201S	8	8	0	0	0	0	0	0	0	1	9	Y
2017	2017-09-04	2	S	corn	2	2	202S	5	2	0	1	1	0	0	0	0	0	4	Y	PITFALL NOT WELL SET INTO GROUND
2017	2017-09-04	2	S	corn	2	2	202S	8	4	0	0	1	0	0	0	1	1	7	Y
2017	2017-09-04	2	S	corn	2	3	203S	5	16	0	1	0	0	0	3	0	0	20	Y
2017	2017-09-04	2	S	corn	2	3	203S	8	8	0	0	0	0	0	1	0	14	23	Y
2017	2017-09-04	2	S	corn	2	4	204S	5	0	0	1	0	0	0	2	0	0	3	Y	PITFALL NOT WELL SET INTO GROUND
2017	2017-09-04	2	S	corn	2	4	204S	8	0	0	0	2	0	0	0	0	0	2	Y
2017	2017-09-04	2	S	corn	2	5	205S	5	1	1	0	0	0	0	0	0	1	3	Y
2017	2017-09-04	2	S	corn	2	5	205S	8	6	2	3	0	0	0	2	0	0	13	Y
2017	2017-09-04	2	S	corn	2	6	206S	5	3	0	1	1	0	0	0	0	0	5	Y
2017	2017-09-04	2	S	corn	2	6	206S	8	4	1	1	0	0	0	0	0	2	8	Y
2017	2017-09-04	2	S	corn	3	1	301S	5	3	0	0	0	0	0	1	0	1	5	Y
2017	2017-09-04	2	S	corn	3	1	301S	8	21	1	0	0	0	0	4	0	1	27	Y
2017	2017-09-04	2	S	corn	3	2	302S	5	0	1	1	0	0	0	1	0	1	4	Y
2017	2017-09-04	2	S	corn	3	2	302S	8	12	0	0	1	0	0	1	0	1	15	Y
2017	2017-09-04	2	S	corn	3	3	303S	5	0	0	0	0	0	0	3	0	0	3	Y	NO PROPO GLYCOL LEFT
2017	2017-09-04	2	S	corn	3	3	303S	8	7	0	1	1	0	0	1	0	1	11	Y
2017	2017-09-04	2	S	corn	3	4	304S	5	1	0	0	0	0	0	1	0	1	3	Y
2017	2017-09-04	2	S	corn	3	4	304S	8	1	0	1	0	0	0	2	0	1	5	Y
2017	2017-09-04	2	S	corn	3	5	305S	5	0	0	0	0	0	0	0	0	0	0	Y	PITFALL NOT WELL SET INTO GROUND
2017	2017-09-04	2	S	corn	3	5	305S	8	7	0	0	1	0	0	1	1	0	10	Y
2017	2017-09-04	2	S	corn	3	6	306S	5	1	0	0	0	0	0	0	0	0	1	Y
2017	2017-09-04	2	S	corn	3	6	306S	8	7	3	1	0	0	0	1	0	2	14	Y
2017	2017-09-04	2	S	corn	4	1	401S	5	10	0	2	1	0	1	5	0	1	20	Y
2017	2017-09-04	2	S	corn	4	1	401S	8	0	2	2	0	0	0	1	0	0	5	Y
2017	2017-09-04	2	S	corn	4	2	402S	5	11	0	1	0	0	0	0	0	0	12	Y
2017	2017-09-04	2	S	corn	4	2	402S	8	5	0	1	0	0	0	1	0	0	7	Y
2017	2017-09-04	2	S	corn	4	3	403S	5	17	1	1	0	0	0	3	0	0	22	Y
2017	2017-09-04	2	S	corn	4	3	403S	8	1	0	1	0	0	0	2	0	4	8	Y
2017	2017-09-04	2	S	corn	4	4	404S	5	5	1	0	0	0	0	2	0	4	12	Y
2017	2017-09-04	2	S	corn	4	4	404S	8	1	4	2	0	0	0	1	0	5	13	Y
2017	2017-09-04	2	S	corn	4	5	405S	5	10	1	2	0	0	1	1	0	0	15	Y
2017	2017-09-04	2	S	corn	4	5	405S	8	1	0	0	0	0	0	0	0	0	1	Y
2017	2017-09-04	2	S	corn	4	6	406S	5	8	0	1	1	0	0	2	0	0	12	Y
2017	2017-09-04	2	S	corn	4	6	406S	8	9	0	1	0	0	0	3	0	1	14	Y
2017	2017-09-04	2	S	corn	5	1	501S	5	1	0	1	0	0	0	1	0	0	3	Y
2017	2017-09-04	2	S	corn	5	1	501S	8	2	1	1	0	0	1	0	0	1	6	Y
2017	2017-09-04	2	S	corn	5	2	502S	5	10	0	2	0	0	0	1	0	0	13	Y
2017	2017-09-04	2	S	corn	5	2	502S	8	1	0	0	0	0	0	0	0	0	1	Y
2017	2017-09-04	2	S	corn	5	3	503S	5	3	0	2	0	0	1	0	0	1	7	Y
2017	2017-09-04	2	S	corn	5	3	503S	8	2	0	0	0	0	1	0	0	0	3	Y
2017	2017-09-04	2	S	corn	5	4	504S	5	13	1	0	0	0	1	4	0	1	20	Y
2017	2017-09-04	2	S	corn	5	4	504S	8	12	0	0	0	0	0	0	0	2	14	Y
2017	2017-09-04	2	S	corn	5	5	505S	5	11	0	0	0	0	0	3	0	2	16	Y
2017	2017-09-04	2	S	corn	5	5	505S	8	2	0	0	0	0	0	1	0	1	4	Y
2017	2017-09-04	2	S	corn	5	6	506S	5	7	0	0	0	0	0	2	0	2	11	Y
2017	2017-09-04	2	S	corn	5	6	506S	8	6	0	1	0	0	2	1	0	2	12	Y
2017	2017-09-04	2	S	corn	6	1	601S	5	1	0	0	0	0	0	0	0	0	1	Y
2017	2017-09-04	2	S	corn	6	1	601S	8	8	0	0	0	0	0	0	0	2	10	Y
2017	2017-09-04	2	S	corn	6	2	602S	5	16	0	1	0	0	0	4	0	0	21	Y
2017	2017-09-04	2	S	corn	6	2	602S	8	30	0	0	0	0	0	5	0	0	35	Y
2017	2017-09-04	2	S	corn	6	3	603S	5	2	0	0	0	0	0	2	0	0	4	Y
2017	2017-09-04	2	S	corn	6	3	603S	8	48	0	0	0	0	0	1	0	3	52	Y
2017	2017-09-04	2	S	corn	6	4	604S	5	36	0	0	1	0	0	0	0	3	40	Y
2017	2017-09-04	2	S	corn	6	4	604S	8	15	0	0	0	0	0	0	0	0	15	Y
2017	2017-09-04	2	S	corn	6	5	605S	5	5	0	0	0	0	0	0	0	1	6	Y
2017	2017-09-04	2	S	corn	6	5	605S	8	26	0	0	0	0	0	0	0	0	26	Y
2017	2017-09-04	2	S	corn	6	6	606S	5	19	0	0	1	0	0	0	0	12	32	Y
2017	2017-09-04	2	S	corn	6	6	606S	8	51	0	1	0	0	0	2	0	1	55	Y
2018	2018-06-18	1	N	corn	1	1	101N	5	2	0	2	5	0	0	1	0	3	13	Y
2018	2018-06-18	1	N	corn	1	1	101N	8	1	1	1	3	0	0	3	1	3	13	Y
2018	2018-06-18	1	N	corn	1	2	102N	5	2	1	0	5	0	2	0	0	9	19	Y
2018	2018-06-18	1	N	corn	1	2	102N	8	1	1	1	3	0	3	5	3	1	18	Y
2018	2018-06-18	1	N	corn	1	3	103N	5	0	0	2	2	0	11	0	1	2	18	Y
2018	2018-06-18	1	N	corn	1	3	103N	8	0	0	0	4	0	1	1	0	118	124	Y
2018	2018-06-18	1	N	corn	1	4	104N	5	0	0	0	0	0	3	0	0	6	9	Y
2018	2018-06-18	1	N	corn	1	4	104N	8	0	1	0	0	0	1	1	0	18	21	Y
2018	2018-06-18	1	N	corn	1	5	105N	5	0	2	1	1	0	10	2	0	25	41	Y
2018	2018-06-18	1	N	corn	1	5	105N	8	0	2	0	3	0	3	5	0	12	25	Y
2018	2018-06-18	1	N	corn	1	6	106N	5	0	7	0	3	0	6	4	1	23	44	Y
2018	2018-06-18	1	N	corn	1	6	106N	8	1	4	0	4	0	2	3	0	3	17	Y
2018	2018-06-18	1	N	corn	2	1	201N	5	1	0	0	8	0	4	1	0	2	16	Y
2018	2018-06-18	1	N	corn	2	1	201N	8	0	0	2	2	0	4	2	0	3	13	Y
2018	2018-06-18	1	N	corn	2	2	202N	5	0	0	3	5	0	2	3	0	12	25	Y
2018	2018-06-18	1	N	corn	2	2	202N	8	2	0	0	1	0	1	1	0	5	10	Y
2018	2018-06-18	1	N	corn	2	3	203N	5	2	1	2	1	0	4	1	1	7	19	Y
2018	2018-06-18	1	N	corn	2	3	203N	8	5	3	1	1	0	3	3	0	11	27	Y
2018	2018-06-18	1	N	corn	2	4	204N	5	0	1	1	0	0	0	1	0	3	6	Y
2018	2018-06-18	1	N	corn	2	4	204N	8	2	1	0	1	0	1	2	2	17	26	Y
2018	2018-06-18	1	N	corn	2	5	205N	5	2	0	3	0	0	1	3	0	3	12	Y
2018	2018-06-18	1	N	corn	2	5	205N	8	2	1	4	0	0	3	2	2	8	22	Y
2018	2018-06-18	1	N	corn	2	6	206N	5	1	4	1	6	0	3	0	0	9	24	Y
2018	2018-06-18	1	N	corn	2	6	206N	8	3	2	8	10	0	8	14	1	3	49	Y
2018	2018-06-18	1	N	corn	3	1	301N	5	0	0	1	0	0	1	3	0	3	8	Y
2018	2018-06-18	1	N	corn	3	1	301N	8	1	1	1	3	0	1	1	0	8	16	Y
2018	2018-06-18	1	N	corn	3	2	302N	5	1	0	1	2	0	3	0	0	4	11	Y
2018	2018-06-18	1	N	corn	3	2	302N	8	0	0	0	0	0	4	0	0	1	5	Y
2018	2018-06-18	1	N	corn	3	3	303N	5	1	0	0	1	0	0	0	0	4	6	Y
2018	2018-06-18	1	N	corn	3	3	303N	8	1	0	0	3	0	1	1	3	7	16	Y
2018	2018-06-18	1	N	corn	3	4	304N	5	0	0	0	2	0	0	0	0	4	6	Y
2018	2018-06-18	1	N	corn	3	4	304N	8	0	1	0	2	0	2	3	0	0	8	Y
2018	2018-06-18	1	N	corn	3	5	305N	5	0	4	0	3	0	4	6	0	4	21	Y
2018	2018-06-18	1	N	corn	3	5	305N	8	0	3	1	2	0	7	0	0	8	21	Y
2018	2018-06-18	1	N	corn	3	6	306N	5	1	3	2	5	0	8	2	0	6	27	Y
2018	2018-06-18	1	N	corn	3	6	306N	8	1	1	0	3	0	5	8	0	3	21	Y
2018	2018-06-18	1	N	corn	4	1	401N	5	0	0	2	10	0	1	2	0	25	40	Y
2018	2018-06-18	1	N	corn	4	1	401N	8	1	0	1	5	0	2	1	0	15	25	Y
2018	2018-06-18	1	N	corn	4	2	402N	5	0	0	0	2	0	4	1	0	11	18	Y
2018	2018-06-18	1	N	corn	4	2	402N	8	2	0	0	1	0	6	0	1	28	38	Y
2018	2018-06-18	1	N	corn	4	3	403N	5	0	0	0	0	0	1	3	0	11	15	Y
2018	2018-06-18	1	N	corn	4	3	403N	8	1	3	0	1	0	5	2	0	8	20	Y
2018	2018-06-18	1	N	corn	4	4	404N	5	0	1	1	1	0	1	3	0	11	18	Y
2018	2018-06-18	1	N	corn	4	4	404N	8	0	0	1	1	0	7	0	0	7	16	Y
2018	2018-06-18	1	N	corn	4	5	405N	5	0	0	0	2	0	1	1	1	4	9	Y
2018	2018-06-18	1	N	corn	4	5	405N	8	0	0	0	1	0	2	1	0	12	16	Y
2018	2018-06-18	1	N	corn	4	6	406N	5	1	0	5	2	0	1	0	0	7	16	Y
2018	2018-06-18	1	N	corn	4	6	406N	8	0	1	0	7	0	1	0	0	21	30	Y
2018	2018-06-18	1	N	corn	5	1	501N	5	0	2	2	1	0	1	1	0	4	11	Y
2018	2018-06-18	1	N	corn	5	1	501N	8	0	2	1	4	0	2	2	0	2	13	Y
2018	2018-06-18	1	N	corn	5	2	502N	5	0	1	0	2	0	2	6	0	19	30	Y
2018	2018-06-18	1	N	corn	5	2	502N	8	0	0	1	2	0	0	7	0	4	14	Y
2018	2018-06-18	1	N	corn	5	3	503N	5	0	0	0	2	0	1	1	0	3	7	Y
2018	2018-06-18	1	N	corn	5	3	503N	8	1	0	0	2	0	3	1	0	0	7	Y
2018	2018-06-18	1	N	corn	5	4	504N	5	0	0	2	1	0	4	4	0	5	16	Y
2018	2018-06-18	1	N	corn	5	4	504N	8	0	0	2	2	0	1	1	0	11	17	Y
2018	2018-06-18	1	N	corn	5	5	505N	5	0	1	0	2	0	4	5	0	2	14	Y
2018	2018-06-18	1	N	corn	5	5	505N	8	1	0	2	3	0	8	2	0	9	25	Y
2018	2018-06-18	1	N	corn	5	6	506N	5	0	0	2	1	0	3	4	0	5	15	Y
2018	2018-06-18	1	N	corn	5	6	506N	8	0	0	0	6	0	2	4	0	6	18	Y
2018	2018-06-18	1	N	corn	6	1	601N	5	0	1	1	5	0	1	15	0	12	35	Y
2018	2018-06-18	1	N	corn	6	1	601N	8	0	2	0	9	0	1	4	0	5	21	Y
2018	2018-06-18	1	N	corn	6	2	602N	5	0	2	1	4	0	0	3	0	12	22	Y
2018	2018-06-18	1	N	corn	6	2	602N	8	0	0	1	4	0	4	2	0	17	28	Y
2018	2018-06-18	1	N	corn	6	3	603N	5	0	0	0	2	0	7	2	0	5	16	Y
2018	2018-06-18	1	N	corn	6	3	603N	8	0	1	1	2	0	2	5	0	18	29	Y
2018	2018-06-18	1	N	corn	6	4	604N	5	0	1	1	1	0	0	2	0	7	12	Y
2018	2018-06-18	1	N	corn	6	4	604N	8	0	0	0	1	0	0	1	0	7	9	Y
2018	2018-06-18	1	N	corn	6	5	605N	5	0	0	1	2	0	5	2	0	7	17	Y
2018	2018-06-18	1	N	corn	6	5	605N	8	0	0	0	1	0	3	4	0	4	12	Y
2018	2018-06-18	1	N	corn	6	6	606N	5	2	2	0	2	0	1	3	0	7	17	Y
2018	2018-06-18	1	N	corn	6	6	606N	8	1	3	3	9	0	1	2	0	10	29	Y
2018	2018-08-13	2	N	soy	1	1	101N	4	13	0	1	3	0	1	0	0	2	20
2018	2018-08-13	2	N	soy	1	1	101N	8	12	0	1	0	0	1	2	0	1	17
2018	2018-08-13	2	N	soy	1	2	102N	4	11	0	0	0	0	1	3	0	0	15
2018	2018-08-13	2	N	soy	1	2	102N	8	6	0	0	0	0	0	4	0	0	10
2018	2018-08-13	2	N	soy	1	3	103N	4	22	0	0	3	0	2	1	0	1	29
2018	2018-08-13	2	N	soy	1	3	103N	8	16	0	0	1	0	0	8	0	0	25
2018	2018-08-13	2	N	soy	1	4	104N	4	5	1	0	1	0	1	5	0	5	18
2018	2018-08-13	2	N	soy	1	4	104N	8	3	0	0	0	0	0	3	0	0	6
2018	2018-08-13	2	N	soy	1	5	105N	4	7	2	1	2	0	1	2	0	2	17
2018	2018-08-13	2	N	soy	1	5	105N	8	19	7	0	0	0	0	11	0	1	38
2018	2018-08-13	2	N	soy	1	6	106N	4	10	3	0	0	0	2	5	0	1	21
2018	2018-08-13	2	N	soy	1	6	106N	8	14	0	0	0	0	0	3	0	0	17
2018	2018-08-13	2	N	soy	2	1	201N	4	13	0	0	1	0	0	0	0	1	15
2018	2018-08-13	2	N	soy	2	1	201N	8	4	0	2	0	0	0	0	0	1	7
2018	2018-08-13	2	N	soy	2	2	202N	4	1	0	0	3	0	0	0	1	3	8
2018	2018-08-13	2	N	soy	2	2	202N	8	11	0	1	3	0	0	0	0	2	17
2018	2018-08-13	2	N	soy	2	3	203N	4	23	2	0	2	0	0	9	0	0	36
2018	2018-08-13	2	N	soy	2	3	203N	8	27	2	0	0	0	0	6	0	1	36
2018	2018-08-13	2	N	soy	2	4	204N	4	7	0	0	0	0	0	4	0	1	12
2018	2018-08-13	2	N	soy	2	4	204N	8	4	0	1	0	0	0	6	0	0	11
2018	2018-08-13	2	N	soy	2	5	205N	4	2	0	2	1	0	0	7	0	0	12
2018	2018-08-13	2	N	soy	2	5	205N	8	1	0	1	1	0	0	3	0	0	6
2018	2018-08-13	2	N	soy	2	6	206N	4	23	0	0	0	0	0	7	1	0	31
2018	2018-08-13	2	N	soy	2	6	206N	8	15	0	0	1	0	0	1	0	0	17
2018	2018-08-13	2	N	soy	3	1	301N	4	5	0	1	1	0	0	0	0	1	8
2018	2018-08-13	2	N	soy	3	1	301N	8	5	0	1	1	0	0	2	1	2	12
2018	2018-08-13	2	N	soy	3	2	302N	4	6	2	1	5	0	0	0	0	2	16
2018	2018-08-13	2	N	soy	3	2	302N	8	7	0	2	2	0	1	0	0	2	14
2018	2018-08-13	2	N	soy	3	3	303N	4	6	3	2	21	0	0	3	0	1	36
2018	2018-08-13	2	N	soy	3	3	303N	8	15	2	4	0	0	0	6	0	5	32
2018	2018-08-13	2	N	soy	3	4	304N	4	2	3	0	1	0	0	6	0	3	15
2018	2018-08-13	2	N	soy	3	4	304N	8	0	0	4	0	0	1	6	0	2	13
2018	2018-08-13	2	N	soy	3	5	305N	4	0	0	0	0	0	0	4	0	3	7
2018	2018-08-13	2	N	soy	3	5	305N	8	0	1	2	1	0	0	0	3	0	7
2018	2018-08-13	2	N	soy	3	6	306N	4	1	1	1	0	0	0	7	0	4	14
2018	2018-08-13	2	N	soy	3	6	306N	8	1	0	0	0	0	0	2	0	0	3
2018	2018-08-13	2	N	soy	4	1	401N	4	0	1	0	1	0	0	0	0	2	4
2018	2018-08-13	2	N	soy	4	1	401N	8	0	0	0	1	0	1	1	0	0	3
2018	2018-08-13	2	N	soy	4	2	402N	4	0	1	2	0	0	0	0	0	1	4
2018	2018-08-13	2	N	soy	4	2	402N	8	0	1	1	2	0	0	5	0	3	12
2018	2018-08-13	2	N	soy	4	3	403N	4	0	2	2	3	0	0	7	0	3	17
2018	2018-08-13	2	N	soy	4	3	403N	8	0	0	0	1	0	3	4	1	3	12
2018	2018-08-13	2	N	soy	4	4	404N	4	0	0	0	0	0	0	0	0	0	0
2018	2018-08-13	2	N	soy	4	4	404N	8	0	0	2	2	0	3	3	0	2	12
2018	2018-08-13	2	N	soy	4	5	405N	4	0	0	0	0	0	0	7	0	4	11
2018	2018-08-13	2	N	soy	4	5	405N	8	0	0	1	4	0	0	2	1	0	8
2018	2018-08-13	2	N	soy	4	6	406N	4	0	0	0	0	0	0	13	0	0	13
2018	2018-08-13	2	N	soy	4	6	406N	8	0	0	0	2	0	1	2	0	1	6
2018	2018-08-13	2	N	soy	5	1	501N	4	0	0	0	1	0	0	0	0	0	1
2018	2018-08-13	2	N	soy	5	1	501N	8	0	0	1	2	0	0	0	1	15	19
2018	2018-08-13	2	N	soy	5	2	502N	4	0	0	1	0	0	0	1	0	3	5
2018	2018-08-13	2	N	soy	5	2	502N	8	1	1	2	1	0	0	3	0	4	12
2018	2018-08-13	2	N	soy	5	3	503N	4	0	0	0	0	0	1	0	0	0	1
2018	2018-08-13	2	N	soy	5	3	503N	8	0	0	4	2	0	0	0	0	2	8
2018	2018-08-13	2	N	soy	5	4	504N	4	0	0	3	0	0	0	0	0	1	4
2018	2018-08-13	2	N	soy	5	4	504N	8	0	1	0	0	0	1	8	1	5	16
2018	2018-08-13	2	N	soy	5	5	505N	4	0	0	0	0	0	0	0	0	0	0
2018	2018-08-13	2	N	soy	5	5	505N	8	0	0	0	0	0	0	5	1	1	7
2018	2018-08-13	2	N	soy	5	6	506N	4	1	2	0	0	0	0	6	1	0	10
2018	2018-08-13	2	N	soy	5	6	506N	8	0	1	1	3	0	1	18	1	6	31
2018	2018-08-13	2	N	soy	6	1	601N	4	0	0	0	1	0	0	9	1	5	16
2018	2018-08-13	2	N	soy	6	1	601N	8	0	0	2	2	0	0	2	0	2	8
2018	2018-08-13	2	N	soy	6	2	602N	4	0	0	0	0	0	2	8	0	7	17
2018	2018-08-13	2	N	soy	6	2	602N	8	1	1	2	0	0	0	0	0	2	6
2018	2018-08-13	2	N	soy	6	3	603N	4	0	0	1	3	0	0	2	0	5	11
2018	2018-08-13	2	N	soy	6	3	603N	8	1	0	1	0	0	3	2	1	3	11
2018	2018-08-13	2	N	soy	6	4	604N	4	0	0	1	3	0	0	0	0	2	6
2018	2018-08-13	2	N	soy	6	4	604N	8	0	0	2	0	0	1	0	0	1	4
2018	2018-08-13	2	N	soy	6	5	605N	4	0	0	0	2	1	1	8	0	0	12
2018	2018-08-13	2	N	soy	6	5	605N	8	0	0	0	0	0	0	7	0	0	7
2018	2018-08-13	2	N	soy	6	6	606N	4	1	3	2	1	0	0	15	2	1	25
2018	2018-08-13	2	N	soy	6	6	606N	8	0	0	0	0	0	0	11	2	1	14
2018	2018-07-09	1	S	soy	1	1	101S	5	1	2	2	8	0	0	7	0	5	25
2018	2018-07-09	1	S	soy	1	1	101S	8	3	6	3	10	0	0	4	1	11	38
2018	2018-07-09	1	S	soy	1	2	102S	5	0	4	3	6	13	0	2	0	9	37
2018	2018-07-09	1	S	soy	1	2	102S	8	2	6	5	3	0	0	1	1	2	20
2018	2018-07-09	1	S	soy	1	3	103S	5	4	6	2	3	0	3	7	1	7	33
2018	2018-07-09	1	S	soy	1	3	103S	8	11	2	1	3	0	11	3	1	2	34
2018	2018-07-09	1	S	soy	1	4	104S	5	6	3	3	0	0	1	8	1	3	25
2018	2018-07-09	1	S	soy	1	4	104S	8	3	1	1	6	14	0	8	0	15	48
2018	2018-07-09	1	S	soy	1	5	105S	5	2	5	0	2	0	2	6	0	0	17
2018	2018-07-09	1	S	soy	1	5	105S	8	1	7	7	4	0	1	4	0	8	32
2018	2018-07-09	1	S	soy	1	6	106S	5	1	1	1	6	0	0	8	0	2	19
2018	2018-07-09	1	S	soy	1	6	106S	8	5	2	5	13	0	2	5	1	23	56
2018	2018-07-09	1	S	soy	2	1	201S	5	8	6	0	9	0	0	10	0	1	34
2018	2018-07-09	1	S	soy	2	1	201S	8	3	5	2	14	0	3	7	0	12	46
2018	2018-07-09	1	S	soy	2	2	202S	5	5	6	3	3	0	1	11	0	8	37
2018	2018-07-09	1	S	soy	2	2	202S	8	1	6	3	1	0	0	4	1	4	20
2018	2018-07-09	1	S	soy	2	3	203S	5	2	2	2	10	0	0	21	1	2	40
2018	2018-07-09	1	S	soy	2	3	203S	8	5	5	1	4	0	0	4	2	7	28
2018	2018-07-09	1	S	soy	2	4	204S	5	4	12	7	2	0	1	2	0	4	32
2018	2018-07-09	1	S	soy	2	4	204S	8	0	1	0	2	0	0	9	0	4	16
2018	2018-07-09	1	S	soy	2	5	205S	5	1	11	4	0	0	0	4	0	13	33
2018	2018-07-09	1	S	soy	2	5	205S	8	0	3	1	10	0	1	16	0	7	38
2018	2018-07-09	1	S	soy	2	6	206S	5	1	2	4	10	0	0	5	1	2	25
2018	2018-07-09	1	S	soy	2	6	206S	8	3	6	5	22	0	2	6	0	6	50
2018	2018-07-09	1	S	soy	3	1	301S	5	3	2	5	2	0	0	7	0	5	24
2018	2018-07-09	1	S	soy	3	1	301S	8	2	10	0	2	0	0	15	1	2	32
2018	2018-07-09	1	S	soy	3	2	302S	5	0	8	2	0	0	0	8	0	11	29
2018	2018-07-09	1	S	soy	3	2	302S	8	2	4	5	5	0	1	11	1	8	37
2018	2018-07-09	1	S	soy	3	3	303S	5	2	5	4	3	0	0	8	1	4	27
2018	2018-07-09	1	S	soy	3	3	303S	8	4	5	5	8	0	1	7	1	6	37
2018	2018-07-09	1	S	soy	3	4	304S	5	1	4	3	4	0	2	5	1	9	29
2018	2018-07-09	1	S	soy	3	4	304S	8	7	13	0	11	0	1	14	0	8	54
2018	2018-07-09	1	S	soy	3	5	305S	5	7	1	2	13	0	2	17	1	5	48
2018	2018-07-09	1	S	soy	3	5	305S	8	1	8	2	12	0	0	7	1	3	34
2018	2018-07-09	1	S	soy	3	6	306S	5	1	2	2	6	0	1	3	0	0	15
2018	2018-07-09	1	S	soy	3	6	306S	8	6	3	0	12	0	0	3	0	15	39
2018	2018-07-09	1	S	soy	4	1	401S	5	5	3	2	8	0	0	10	0	4	32
2018	2018-07-09	1	S	soy	4	1	401S	8	2	10	2	7	0	0	13	0	4	38
2018	2018-07-09	1	S	soy	4	2	402S	5	9	7	2	9	0	1	25	0	14	67
2018	2018-07-09	1	S	soy	4	2	402S	8	5	9	1	23	0	2	22	3	16	81
2018	2018-07-09	1	S	soy	4	3	403S	5	3	7	0	10	0	2	13	0	7	42
2018	2018-07-09	1	S	soy	4	3	403S	5	1	3	3	12	0	0	17	0	0	36
2018	2018-07-09	1	S	soy	4	4	404S	5	2	2	6	0	0	0	10	0	3	23
2018	2018-07-09	1	S	soy	4	4	404S	8	2	8	3	12	0	3	11	1	7	47
2018	2018-07-09	1	S	soy	4	5	405S	8	3	1	1	10	0	0	8	1	4	28
2018	2018-07-09	1	S	soy	4	5	405S	8	8	1	1	2	0	0	15	1	1	29
2018	2018-07-09	1	S	soy	4	6	406S	5	1	10	2	11	0	0	11	0	25	60
2018	2018-07-09	1	S	soy	4	6	406S	8	1	2	3	8	0	1	0	1	1	17
2018	2018-07-09	1	S	soy	5	1	501S	5	5	3	2	14	0	0	22	0	9	55
2018	2018-07-09	1	S	soy	5	1	501S	8	6	15	3	9	0	2	19	0	8	62
2018	2018-07-09	1	S	soy	5	2	502S	5	5	6	1	11	0	1	7	0	7	38
2018	2018-07-09	1	S	soy	5	2	502S	8	5	3	0	17	0	0	12	0	9	46
2018	2018-07-09	1	S	soy	5	3	503S	5	6	2	5	10	0	0	12	1	2	38
2018	2018-07-09	1	S	soy	5	3	503S	8	1	0	1	3	0	0	7	0	4	16
2018	2018-07-09	1	S	soy	5	4	504S	5	0	5	2	11	0	0	7	0	18	43
2018	2018-07-09	1	S	soy	5	4	504S	8	3	0	2	8	0	5	4	0	6	28
2018	2018-07-09	1	S	soy	5	5	505S	5	7	2	5	9	0	0	13	0	0	36
2018	2018-07-09	1	S	soy	5	5	505S	8	0	7	3	3	0	0	6	0	9	28
2018	2018-07-09	1	S	soy	5	6	506S	5	4	3	4	5	0	0	2	0	3	21
2018	2018-07-09	1	S	soy	5	6	506S	8	5	1	1	11	0	1	6	0	7	32
2018	2018-07-09	1	S	soy	6	1	601S	5	3	1	0	4	0	0	10	0	11	29
2018	2018-07-09	1	S	soy	6	1	601S	8	0	0	1	10	0	0	10	1	9	31
2018	2018-07-09	1	S	soy	6	2	602S	5	1	3	3	10	0	0	11	0	21	49
2018	2018-07-09	1	S	soy	6	2	602S	8	3	0	1	10	0	1	7	1	10	33
2018	2018-07-09	1	S	soy	6	3	603S	5	4	0	2	8	0	0	3	0	6	23
2018	2018-07-09	1	S	soy	6	3	603S	8	3	0	0	10	0	2	9	0	23	47
2018	2018-07-09	1	S	soy	6	4	604S	5	3	3	1	25	0	0	2	0	11	45
2018	2018-07-09	1	S	soy	6	4	604S	8	1	2	1	7	0	2	12	0	14	39
2018	2018-07-09	1	S	soy	6	5	605S	5	4	2	0	21	0	0	4	1	15	47
2018	2018-07-09	1	S	soy	6	5	605S	8	2	0	0	17	0	0	6	0	25	50
2018	2018-07-09	1	S	soy	6	6	606S	5	3	0	1	6	0	0	7	0	14	31
2018	2018-07-09	1	S	soy	6	6	606S	8	2	1	2	7	0	0	13	0	24	49
2018	2018-09-03	2	S	corn	1	1	101S	5	35	0	1	4	0	0	19	0	2	61
2018	2018-09-03	2	S	corn	1	1	101S	8	6	1	0	0	0	0	11	0	2	20
2018	2018-09-03	2	S	corn	1	2	102S	5	68	1	0	2	0	1	2	0	2	76
2018	2018-09-03	2	S	corn	1	2	102S	8	29	6	0	2	0	4	7	1	5	54
2018	2018-09-03	2	S	corn	1	3	103S	5	0	2	0	1	0	2	10	0	4	19
2018	2018-09-03	2	S	corn	1	3	103S	8	0	0	0	1	0	1	26	1	1	30
2018	2018-09-03	2	S	corn	1	4	104S	5	0	0	0	0	0	0	18	0	0	18
2018	2018-09-03	2	S	corn	1	4	104S	8	0	0	0	0	0	0	8	0	0	8
2018	2018-09-03	2	S	corn	1	5	105S	5	0	4	0	2	0	1	8	0	3	18
2018	2018-09-03	2	S	corn	1	5	105S	8	0	0	0	0	0	0	11	0	1	12
2018	2018-09-03	2	S	corn	1	6	106S	5	0	0	0	1	0	5	10	0	0	16
2018	2018-09-03	2	S	corn	1	6	106S	8	0	0	0	2	0	0	16	1	0	19
2018	2018-09-03	2	S	corn	2	1	201S	5	0	0	0	0	0	1	19	0	1	21
2018	2018-09-03	2	S	corn	2	1	201S	8	0	1	0	0	0	0	18	0	2	21
2018	2018-09-03	2	S	corn	2	2	202S	5	1	0	1	1	0	0	1	1	2	7
2018	2018-09-03	2	S	corn	2	2	202S	8	0	1	0	2	0	2	5	0	13	23
2018	2018-09-03	2	S	corn	2	3	203S	5	0	0	1	1	0	2	25	1	2	32
2018	2018-09-03	2	S	corn	2	3	203S	8	1	0	0	1	0	7	4	0	1	14
2018	2018-09-03	2	S	corn	2	4	204S	5	0	1	1	1	0	0	18	0	1	22
2018	2018-09-03	2	S	corn	2	4	204S	8	0	1	0	2	0	2	7	0	59	71
2018	2018-09-03	2	S	corn	2	5	205S	5	0	0	0	6	0	3	14	0	1	24
2018	2018-09-03	2	S	corn	2	5	205S	8	0	0	0	0	0	4	6	1	0	11
2018	2018-09-03	2	S	corn	2	6	206S	5	0	0	0	0	0	2	5	0	1	8
2018	2018-09-03	2	S	corn	2	6	206S	8	0	2	0	0	0	1	10	0	0	13
2018	2018-09-03	2	S	corn	3	1	301S	5	0	0	0	2	0	5	8	0	2	17
2018	2018-09-03	2	S	corn	3	1	301S	8	0	0	1	2	0	2	17	0	1	23
2018	2018-09-03	2	S	corn	3	2	302S	5	0	1	1	4	0	2	12	0	3	23
2018	2018-09-03	2	S	corn	3	2	302S	8	0	0	0	0	0	3	8	0	1	12
2018	2018-09-03	2	S	corn	3	3	303S	5	0	0	1	1	0	0	5	0	0	7
2018	2018-09-03	2	S	corn	3	3	303S	8	0	1	1	0	0	5	11	0	1	19
2018	2018-09-03	2	S	corn	3	4	304S	5	0	0	0	2	0	2	2	0	0	6
2018	2018-09-03	2	S	corn	3	4	304S	8	1	1	1	3	0	5	11	0	0	22
2018	2018-09-03	2	S	corn	3	5	305S	5	1	0	0	3	0	0	11	0	0	15
2018	2018-09-03	2	S	corn	3	5	305S	8	0	0	1	0	0	0	13	0	1	15
2018	2018-09-03	2	S	corn	3	6	306S	5	0	1	0	1	0	2	23	0	0	27
2018	2018-09-03	2	S	corn	3	6	306S	8	1	0	0	3	0	1	19	0	0	24
2018	2018-09-03	2	S	corn	4	1	401S	5	0	0	2	1	0	1	15	0	3	22
2018	2018-09-03	2	S	corn	4	1	401S	8	0	3	0	6	0	7	33	0	2	51
2018	2018-09-03	2	S	corn	4	2	402S	5	0	3	0	5	0	0	27	0	4	39
2018	2018-09-03	2	S	corn	4	2	402S	8	0	2	1	0	0	0	4	1	0	8
2018	2018-09-03	2	S	corn	4	3	403S	5	0	0	0	0	0		16	0	1	17
2018	2018-09-03	2	S	corn	4	3	403S	8	0	5	0	2	0	0	15	0	3	25
2018	2018-09-03	2	S	corn	4	4	404S	5	0	0	0	0	0	0	4	0	0	4
2018	2018-09-03	2	S	corn	4	4	404S	8	0	1	0	0	0	0	13	0	2	16
2018	2018-09-03	2	S	corn	4	5	405S	5	0	1	0	0	0	0	13	0	0	14
2018	2018-09-03	2	S	corn	4	5	405S	8	0	0	0	4	0	0	14	0	0	18
2018	2018-09-03	2	S	corn	4	6	406S	5	0	0	0	1	0	0	5	0	0	6
2018	2018-09-03	2	S	corn	4	6	406S	8	0	1	0	0	0	1	25	0	0	27
2018	2018-09-03	2	S	corn	5	1	501S	5	1	2	1	1	0	0	6	0	0	11
2018	2018-09-03	2	S	corn	5	1	501S	8	0	5	2	2	0	0	18	0	2	29
2018	2018-09-03	2	S	corn	5	2	502S	5												NO DATA
2018	2018-09-03	2	S	corn	5	2	502S	8	0	1	1	0	0	1	16	0	0	19
2018	2018-09-03	2	S	corn	5	3	503S	5	0	0	0	1	0	0	11	0	7	19
2018	2018-09-03	2	S	corn	5	3	503S	8	0	0	0	0	0	0	17	0	1	18
2018	2018-09-03	2	S	corn	5	4	504S	5	0	2	1	2	0	0	30	1	5	41
2018	2018-09-03	2	S	corn	5	4	504S	8	0	1	1	6	0	0	11	0	1	20
2018	2018-09-03	2	S	corn	5	5	505S	5	0	2	1	0	0	1	9	0	2	15
2018	2018-09-03	2	S	corn	5	5	505S	8	0	2	1	0	0	1	9	0	2	15
2018	2018-09-03	2	S	corn	5	6	506S	5	0	1	1	1	0	0	6	0	0	9
2018	2018-09-03	2	S	corn	5	6	506S	8	0	0	1	1	0	0	15	0	4	21
2018	2018-09-03	2	S	corn	6	1	601S	5	0	0	0	1	0	0	11	0	4	16
2018	2018-09-03	2	S	corn	6	1	601S	8	0	0	0	1	0	7	8	1	3	20
2018	2018-09-03	2	S	corn	6	2	602S	5	0	0	0	3	0	0	3	0	13	19
2018	2018-09-03	2	S	corn	6	2	602S	8	0	0	0	0	0	2	1	0	5	8
2018	2018-09-03	2	S	corn	6	3	603S	5	0	0	0	0	0	0	1	0	1	2
2018	2018-09-03	2	S	corn	6	3	603S	8	0	0	0	0	0	1	0	0	4	5
2018	2018-09-03	2	S	corn	6	4	604S	5	1	0	0	1	0	1	9	0	1	13
2018	2018-09-03	2	S	corn	6	4	604S	8	0	0	0	2	0	3	10	0	1	16
2018	2018-09-03	2	S	corn	6	5	605S	5	1	0	0	0	0	5	6	0	2	14
2018	2018-09-03	2	S	corn	6	5	605S	8	0	0	0	0	0	0	3	0	0	3
2018	2018-09-03	2	S	corn	6	6	606S	5	0	0	0	0	0	1	8	1	4	14
2018	2018-09-03	2	S	corn	6	6	606S	8	0	0	0	4	0	2	8	0	7	21
2019	2019-06-10	1	N	soy	1	1	101N	5	1	3	0	1	0	5	3	0	3	16
2019	2019-06-10	1	N	soy	1	1	101N	8	1	0	2	1	0	2	2	0	0	8
2019	2019-06-10	1	N	soy	1	2	102N	5	1	1	1	4	0	9	5	0	1	22
2019	2019-06-10	1	N	soy	1	2	102N	8	1	1	3	5	0	2	5	0	1	18
2019	2019-06-10	1	N	soy	1	3	103N	5	1	2	3	14	0	5	3	0	4	32
2019	2019-06-10	1	N	soy	1	3	103N	8	1	0	1	1	0	4	2	0	1	10
2019	2019-06-10	1	N	soy	1	4	104N	5	0	0	1	8	0	8	5	0	5	27
2019	2019-06-10	1	N	soy	1	4	104N	8	0	1	1	2	0	3	4	0	7	18
2019	2019-06-10	1	N	soy	1	5	105N	5	2	1	5	13	0	6	5	0	7	39
2019	2019-06-10	1	N	soy	1	5	105N	8	2	3	10	3	0	14	8	0	3	43
2019	2019-06-10	1	N	soy	1	6	106N	5	0	0	3	4	0	3	5	0	6	21
2019	2019-06-10	1	N	soy	1	6	106N	8	0	0	4	6	0	1	3	0	3	17
2019	2019-06-10	1	N	soy	2	1	201N	5	1	2	2	7	0	11	0	0	3	26
2019	2019-06-10	1	N	soy	2	1	201N	8	3	0	1	8	0	8	1	0	1	22
2019	2019-06-10	1	N	soy	2	2	202N	5	1	0	3	1	0	1	2	0	3	11
2019	2019-06-10	1	N	soy	2	2	202N	8	0	1	1	3	0	4	4	0	2	15
2019	2019-06-10	1	N	soy	2	3	203N	5	0	1	1	9	0	1	3	0	3	18
2019	2019-06-10	1	N	soy	2	3	203N	8	0	0	2	2	0	2	5	0	6	17
2019	2019-06-10	1	N	soy	2	4	204N	5	2	5	1	6	0	5	7	1	1	28
2019	2019-06-10	1	N	soy	2	4	204N	8	0	0	1	3	0	4	5	0	2	15
2019	2019-06-10	1	N	soy	2	5	205N	5	0	1	3	5	0	3	5	0	1	18
2019	2019-06-10	1	N	soy	2	5	205N	8	0	2	1	12	0	3	6	0	1	25
2019	2019-06-10	1	N	soy	2	6	206N	5	0	0	0	7	0	2	5	0	4	18
2019	2019-06-10	1	N	soy	2	6	206N	8	2	3	0	9	0	8	4	0	4	30
2019	2019-06-10	1	N	soy	3	1	301N	5	2	0	0	2	0	0	1	0	0	5
2019	2019-06-10	1	N	soy	3	1	301N	8	0	0	0	2	0	4	1	0	2	9
2019	2019-06-10	1	N	soy	3	2	302N	5	0	0	0	4	0	5	0	0	0	9
2019	2019-06-10	1	N	soy	3	2	302N	8	0	0	1	6	0	6	1	0	3	17
2019	2019-06-10	1	N	soy	3	3	303N	5	0	3	0	9	0	9	2	0	10	33
2019	2019-06-10	1	N	soy	3	3	303N	8	0	2	3	5	0	8	2	0	6	26
2019	2019-06-10	1	N	soy	3	4	304N	5	0	1	3	3	0	0	6	0	3	16
2019	2019-06-10	1	N	soy	3	4	304N	8	0	0	1	48	0	5	2	0	1	57
2019	2019-06-10	1	N	soy	3	5	305N	5	0	5	1	6	0	1	5	0	3	21
2019	2019-06-10	1	N	soy	3	5	305N	8	1	0	3	7	0	1	1	0	1	14
2019	2019-06-10	1	N	soy	3	6	306N	5	0	0	2	12	0	3	4	0	2	23
2019	2019-06-10	1	N	soy	3	6	306N	8	0	0	1	4	0	1	4	0	2	12
2019	2019-06-10	1	N	soy	4	1	401N	5	0	2	1	11	0	2	2	0	5	23
2019	2019-06-10	1	N	soy	4	1	401N	8		1	3	6	0	1	1	0	4	16
2019	2019-06-10	1	N	soy	4	2	402N	5	0	2	1	9	0	3	2	0	11	28
2019	2019-06-10	1	N	soy	4	2	402N	8	0	1	5	8	0	7	0	0	11	32
2019	2019-06-10	1	N	soy	4	3	403N	5	2	0	1	10	0	2	3	0	0	18
2019	2019-06-10	1	N	soy	4	3	403N	8	3	0	5	2	0	4	3	0	4	21
2019	2019-06-10	1	N	soy	4	4	404N	5	0	1	0	4	0	5	2	0	4	16
2019	2019-06-10	1	N	soy	4	4	404N	8	2	0	1	2	0	6	4	0	0	15
2019	2019-06-10	1	N	soy	4	5	405N	5	0	2	3	8	0	7	3	0	4	27
2019	2019-06-10	1	N	soy	4	5	405N	8	1	0	1	4	0	5	4	0	2	17
2019	2019-06-10	1	N	soy	4	6	406N	5	2	0	5	5	0	7	12	0	17	48
2019	2019-06-10	1	N	soy	4	6	406N	8	1	5	3	5	0	2	1	0	10	27
2019	2019-06-10	1	N	soy	5	1	501N	5	0	1	2	8	0	3	6	0	3	23
2019	2019-06-10	1	N	soy	5	1	501N	8	0	2	0	17	0	3	0	0	6	28
2019	2019-06-10	1	N	soy	5	2	502N	5	1	4	1	6	0	4	1	0	2	19
2019	2019-06-10	1	N	soy	5	2	502N	8	1	0	6	9	0	0	0	0	6	22
2019	2019-06-10	1	N	soy	5	3	503N	5	0	0	2	2	0	2	0	0	2	8
2019	2019-06-10	1	N	soy	5	3	503N	8	2	0	2	3	0	2	2	0	2	13
2019	2019-06-10	1	N	soy	5	4	504N	5	0	2	2	2	0	3	1	0	5	15
2019	2019-06-10	1	N	soy	5	4	504N	8	0	5	8	3	0	1	0	0	1	18
2019	2019-06-10	1	N	soy	5	5	505N	5	0	0	9	2	0	4	2	0	1	18
2019	2019-06-10	1	N	soy	5	5	505N	8	0	2	1	5	0	0	0	0	1	9
2019	2019-06-10	1	N	soy	5	6	506N	5	2	1	4	4	0	12	5	0	1	29
2019	2019-06-10	1	N	soy	5	6	506N	8	4	1	6	10	0	4	2	0	2	29
2019	2019-06-10	1	N	soy	6	1	601N	5	0	4	3	5	0	5	3	0	9	29
2019	2019-06-10	1	N	soy	6	1	601N	8	1	4	6	8	0	1	0	0	4	24
2019	2019-06-10	1	N	soy	6	2	602N	5	0	0	3	2	0	1	3	0	10	19
2019	2019-06-10	1	N	soy	6	2	602N	8	1	1	6	5	0	0	0	0	1	14
2019	2019-06-10	1	N	soy	6	3	603N	5	0	2	4	3	0	3	2	1	1	16
2019	2019-06-10	1	N	soy	6	3	603N	8	0	2	5	5	0	1	2	0	5	20
2019	2019-06-10	1	N	soy	6	4	604N	5	5	0	2	3	0	2	1	0	2	15
2019	2019-06-10	1	N	soy	6	4	604N	8	0	4	3	9	0	4	2	0	2	24
2019	2019-06-10	1	N	soy	6	5	605N	5	4	0	0	6	0	2	0	0	2	14
2019	2019-06-10	1	N	soy	6	5	605N	8	1	3	4	11	0	7	6	0	1	33
2019	2019-06-10	1	N	soy	6	6	606N	5	3	0	11	3	0	15	4	0	2	38
2019	2019-06-10	1	N	soy	6	6	606N	8	2	0	2	0	0	1	2	0	0	7
2019	2019-08-26	2	N	soy	1	1	101N	5	16	0	1	3	0	6	0	0	2	28
2019	2019-08-26	2	N	soy	1	1	101N	8	13	5	1	4	0	4	2	0	0	29
2019	2019-08-26	2	N	soy	1	2	102N	5	7	1	1	7	0	4	13	0	1	34
2019	2019-08-26	2	N	soy	1	2	102N	8	9	1	3	5	0	9	10	2	1	40
2019	2019-08-26	2	N	soy	1	3	103N	5	2	0	0	4	0	6	1	2	1	16
2019	2019-08-26	2	N	soy	1	3	103N	8	13	1	1	4	22	7	3	0	1	52
2019	2019-08-26	2	N	soy	1	4	104N	5	7	1	2	9	0	11	5	0	2	37
2019	2019-08-26	2	N	soy	1	4	104N	8	5	0	0	15	0	27	3	1	0	51
2019	2019-08-26	2	N	soy	1	5	105N	5	11	0	1	5	22	10	5	0	1	55
2019	2019-08-26	2	N	soy	1	5	105N	8	5	1	0	7	0	13	2	0	5	33
2019	2019-08-26	2	N	soy	1	6	106N	5	6	1	2	5	66	9	4	3	1	97
2019	2019-08-26	2	N	soy	1	6	106N	8	19	0	2	5	0	12	1	2	3	44
2019	2019-08-26	2	N	soy	2	1	201N	5	5	0	1	1	0	9	0	1	0	17
2019	2019-08-26	2	N	soy	2	1	201N	8	5	1	1	4	0	29	0	1	3	44
2019	2019-08-26	2	N	soy	2	2	202N	5												NO Data
2019	2019-08-26	2	N	soy	2	2	202N	8	8	0	0	5	0	5	2	0	0	20
2019	2019-08-26	2	N	soy	2	3	203N	5	9	1	0	5	0	13	7	0	1	36
2019	2019-08-26	2	N	soy	2	3	203N	8	9	3	0	4	0	21	11	1	1	50
2019	2019-08-26	2	N	soy	2	4	204N	5	3	0	0	6	0	1	3	1	0	14
2019	2019-08-26	2	N	soy	2	4	204N	8	6	0	0	7	0	21	1	1	0	36
2019	2019-08-26	2	N	soy	2	5	205N	5	4	0	1	6	0	6	7	0	0	24
2019	2019-08-26	2	N	soy	2	5	205N	8	4	0	3	8	0	15	0	0	9	39
2019	2019-08-26	2	N	soy	2	6	206N	5	7	2	0	4	27	5	2	1	0	48
2019	2019-08-26	2	N	soy	2	6	206N	8	3	0	3	2	0	10	2	1	0	21
2019	2019-08-26	2	N	soy	3	1	301N	5	1	1	0	3	0	7	0	0	1	13
2019	2019-08-26	2	N	soy	3	1	301N	8	20	1	2	3	0	1	0	0	1	28
2019	2019-08-26	2	N	soy	3	2	302N	5	6	1	0	6	0	10	2	0	1	26
2019	2019-08-26	2	N	soy	3	2	302N	8	15	1	1	3	0	19	0	0	0	39
2019	2019-08-26	2	N	soy	3	3	303N	5	4	0	0	3	0	43	4	1	1	56
2019	2019-08-26	2	N	soy	3	3	303N	8	5	4	0	6	0	15	0	1	13	44
2019	2019-08-26	2	N	soy	3	4	304N	5	6	2	1	4	0	9	7	0	2	31
2019	2019-08-26	2	N	soy	3	4	304N	8	2	0	0	2	0	4	2	0	0	10
2019	2019-08-26	2	N	soy	3	5	305N	5	6	2	1	5	0	13	5	1	12	45
2019	2019-08-26	2	N	soy	3	5	305N	8	8	1	0	4	0	12	1	0	0	26
2019	2019-08-26	2	N	soy	3	6	306N	5	6	2	0	5	0	19	15	1	12	60
2019	2019-08-26	2	N	soy	3	6	306N	8	9	0	5	13	29	17	3	2	1	79
2019	2019-08-26	2	N	soy	4	1	401N	5	2	5	1	1	0	1	0	2	4	16
2019	2019-08-26	2	N	soy	4	1	401N	8	1	0	0	4	0	5	1	0	0	11
2019	2019-08-26	2	N	soy	4	2	402N	5	4	0	0	4	0	4	1	1	0	14
2019	2019-08-26	2	N	soy	4	2	402N	8	0	0	1	0	0	8	0	0	4	13
2019	2019-08-26	2	N	soy	4	3	403N	5	5	0	0	3	0	2	0	0	0	10
2019	2019-08-26	2	N	soy	4	3	403N	8	7	0	3	1	0	6	4	3	1	25
2019	2019-08-26	2	N	soy	4	4	404N	5	4	0	0	3	0	2	1	2	1	13
2019	2019-08-26	2	N	soy	4	4	404N	8	4	0	1	10	0	10	4	0	0	29
2019	2019-08-26	2	N	soy	4	5	405N	5	14	2	0	2	0	3	2	0	1	24
2019	2019-08-26	2	N	soy	4	5	405N	8	4	0	0	5	0	16	0	2	1	28
2019	2019-08-26	2	N	soy	4	6	406N	5	3	0	0	3	0	0	3	1	2	12
2019	2019-08-26	2	N	soy	4	6	406N	8	6	1	0	5	0	12	0	0	2	26
2019	2019-08-26	2	N	soy	5	1	501N	5	5	0	0	1	0	5	5	1	1	18
2019	2019-08-26	2	N	soy	5	1	501N	8	0	1	1	0	0	1	0	0	0	3
2019	2019-08-26	2	N	soy	5	2	502N	5	4	2	1	3	0	2	3	3	3	21
2019	2019-08-26	2	N	soy	5	2	502N	8	0	0	8	4	0	6	0	1	0	19
2019	2019-08-26	2	N	soy	5	3	503N	5	17	0	1	5	0	6	1	0	1	31
2019	2019-08-26	2	N	soy	5	3	503N	8	4	1	5	5	0	4	3	1	2	25
2019	2019-08-26	2	N	soy	5	4	504N	5	9	0	0	3	0	3	0	1	1	17
2019	2019-08-26	2	N	soy	5	4	504N	8	3	0	10	3	0	5	7	0	0	28
2019	2019-08-26	2	N	soy	5	5	505N	5	4	0	0	3	0	4	6	4	0	21
2019	2019-08-26	2	N	soy	5	5	505N	8	1	0	0	0	0	0	1	1	0	3
2019	2019-08-26	2	N	soy	5	6	506N	5	6	1	2	3	0	3	3	1	0	19
2019	2019-08-26	2	N	soy	5	6	506N	8	4	0	1	3	0	7	5	0	4	24
2019	2019-08-26	2	N	soy	6	1	601N	5	6	1	0	1	0	6	4	0	2	20
2019	2019-08-26	2	N	soy	6	1	601N	8	9	1	2	1	0	8	1	1	2	25
2019	2019-08-26	2	N	soy	6	2	602N	5	2	1	0	6	0	13	2	0	2	26
2019	2019-08-26	2	N	soy	6	2	602N	8	3	0	0	2	0	8	2	2	5	22
2019	2019-08-26	2	N	soy	6	3	603N	5	1	1	0	2	0	17	2	0	2	25
2019	2019-08-26	2	N	soy	6	3	603N	8	9	0	1	1	0	11	2	0	5	29
2019	2019-08-26	2	N	soy	6	4	604N	5	4	1	1	12	0	7	2	0	5	32
2019	2019-08-26	2	N	soy	6	4	604N	8	4	0	0	0	0	7	2	0	0	13
2019	2019-08-26	2	N	soy	6	5	605N	5	3	0	0	5	0	0	2	2	1	13
2019	2019-08-26	2	N	soy	6	5	605N	8	2	0	0	1	0	3	0	1	1	8
2019	2019-08-26	2	N	soy	6	6	606N	5	10	0	0	5	0	8	0	0	1	24
2019	2019-08-26	2	N	soy	6	6	606N	8	3	0	0	3	0	2	2	1	36	47
2019	2019-06-03	1	S	corn	1	1	101S	5	1	0	4	3	0	4	2	0	4	18
2019	2019-06-03	1	S	corn	1	1	101S	8	0	0	2	2	0	5	2	1	5	17
2019	2019-06-03	1	S	corn	1	2	102S	5	1	4	1	6	0	3	1	0	7	23
2019	2019-06-03	1	S	corn	1	2	102S	8	1	1	1	5	0	1	2	0	2	13
2019	2019-06-03	1	S	corn	1	3	103S	5	1	1	0	4	0	9	1	0	3	19
2019	2019-06-03	1	S	corn	1	3	103S	8	1	3	2	5	0	6	1	0	1	19
2019	2019-06-03	1	S	corn	1	4	104S	5	0	1	0	5	1	5	3	0	1	16
2019	2019-06-03	1	S	corn	1	4	104S	8	0	3	0	10	0	3	1	0	10	27
2019	2019-06-03	1	S	corn	1	5	105S	5	0	1	0	3	0	3	2	0	0	9
2019	2019-06-03	1	S	corn	1	5	105S	8	0	3	0	5	0	3	5	0	3	19
2019	2019-06-03	1	S	corn	1	6	106S	5	7	2	1	9	0	6	2	0	1	28
2019	2019-06-03	1	S	corn	1	6	106S	8	2	0	1	10	0	6	2	0	6	27
2019	2019-06-03	1	S	corn	2	1	201S	5	6	1	2	5	0	6	1	0	9	30
2019	2019-06-03	1	S	corn	2	1	201S	8	0	1	1	8	0	1	3	1	4	19
2019	2019-06-03	1	S	corn	2	2	202S	5	1	1	0	2	0	2	1	0	5	12
2019	2019-06-03	1	S	corn	2	2	202S	8	0	2	1	2	0	0	3	0	7	15
2019	2019-06-03	1	S	corn	2	3	203S	5	3	2	0	7	0	5	2	0	5	24
2019	2019-06-03	1	S	corn	2	3	203S	8	0	0	3	3	0	3	0	0	5	14
2019	2019-06-03	1	S	corn	2	4	204S	5	0	8	2	4	0	4	6	0	19	43
2019	2019-06-03	1	S	corn	2	4	204S	8	1	2	2	0	0	1	3	0	7	16
2019	2019-06-03	1	S	corn	2	5	205S	5	0	1	1	5	0	8	2	0	3	20
2019	2019-06-03	1	S	corn	2	5	205S	8	2	1	1	4	0	3	3	0	0	14
2019	2019-06-03	1	S	corn	2	6	206S	5	2	1	1	10	0	6	2	0	2	24
2019	2019-06-03	1	S	corn	2	6	206S	8	0	0	1	9	0	6	1	0	1	18
2019	2019-06-03	1	S	corn	3	1	301S	5	0	1	0	2	0	2	3	0	1	9
2019	2019-06-03	1	S	corn	3	1	301S	8	0	0	0	6	0	2	0	0	5	13
2019	2019-06-03	1	S	corn	3	2	302S	5	0	0	1	7	0	10	3	0	8	29
2019	2019-06-03	1	S	corn	3	2	302S	8	0	6	0	1	0	10	4	0	16	37
2019	2019-06-03	1	S	corn	3	3	303S	5	0	2	0	2	0	12	3	0	3	22
2019	2019-06-03	1	S	corn	3	3	303S	8	0	2	3	6	0	10	1	0	3	25
2019	2019-06-03	1	S	corn	3	4	304S	5	0	4	3	7	0	10	2	0	12	38
2019	2019-06-03	1	S	corn	3	4	304S	8	0	1	0	2	0	4	1	0	37	45
2019	2019-06-03	1	S	corn	3	5	305S	5	2	3	4	4	0	6	1	0	12	32
2019	2019-06-03	1	S	corn	3	5	305S	8	2	1	3	5	0	1	0	0	1	13
2019	2019-06-03	1	S	corn	3	6	306S	5	0	0	1	1	0	2	2	0	2	8
2019	2019-06-03	1	S	corn	3	6	306S	8	1	3	2	20	0	2	1	0	5	34
2019	2019-06-03	1	S	corn	4	1	401S	5	0	1	1	13	0	1	6	0	26	48
2019	2019-06-03	1	S	corn	4	1	401S	8	2	4	4	7	0	3	3	0	15	38
2019	2019-06-03	1	S	corn	4	2	402S	5	0	0	0	1	0	2	0	0	4	7
2019	2019-06-03	1	S	corn	4	2	402S	8	0	2	2	4	0	3	3	0	6	20
2019	2019-06-03	1	S	corn	4	3	403S	5	1	5	4	6	0	3	3	0	10	32
2019	2019-06-03	1	S	corn	4	3	403S	8	0	1	2	8	0	2	0	5	18	36
2019	2019-06-03	1	S	corn	4	4	404S	5	0	2	0	1	0	0	1	0	14	18
2019	2019-06-03	1	S	corn	4	4	404S	8	0	1	7	8	0	1	2	0	10	29
2019	2019-06-03	1	S	corn	4	5	405S	5	2	1	3	7	0	8	3	0	24	48
2019	2019-06-03	1	S	corn	4	5	405S	8	0	2	1	3	0	1	2	0	5	14
2019	2019-06-03	1	S	corn	4	6	406S	5	0	0	0	4	0	5	1	0	9	19
2019	2019-06-03	1	S	corn	4	6	406S	8	0	3	1	4	0	5	1	0	4	18
2019	2019-06-03	1	S	corn	5	1	501S	5	0	2	2	4	1	4	2	0	17	32
2019	2019-06-03	1	S	corn	5	1	501S	8	0	2	6	16	0	0	2	0	9	35
2019	2019-06-03	1	S	corn	5	2	502S	5	5	0	2	6	0	1	0	0	12	26
2019	2019-06-03	1	S	corn	5	2	502S	8	0	7	1	5	0	0	0	0	21	34
2019	2019-06-03	1	S	corn	5	3	503S	5	1	4	1	8	0	2	1	0	11	28
2019	2019-06-03	1	S	corn	5	3	503S	8	0	2	8	3	0	1	0	0	27	41
2019	2019-06-03	1	S	corn	5	4	504S	5	0	0	1	1	0	1	1	0	7	11
2019	2019-06-03	1	S	corn	5	4	504S	8	1	1	4	8	0	2	1	0	7	24
2019	2019-06-03	1	S	corn	5	5	505S	5	0	0	2	7	0	1	0	0	8	18
2019	2019-06-03	1	S	corn	5	5	505S	8	1	1	2	9	0	2	1	9	11	36
2019	2019-06-03	1	S	corn	5	6	506S	5	0	1	1	4	0	4	1	0	7	18
2019	2019-06-03	1	S	corn	5	6	506S	8	1	7	2	7	0	2	1	0	20	40
2019	2019-06-03	1	S	corn	6	1	601S	5	0	5	0	3	0	4	2	0	14	28
2019	2019-06-03	1	S	corn	6	1	601S	8	1	0	1	6	1	10	1	0	22	42
2019	2019-06-03	1	S	corn	6	2	602S	5	0	1	1	3	0	4	2	0	23	34
2019	2019-06-03	1	S	corn	6	2	602S	8	0	6	2	8	0	1	0	0	48	65
2019	2019-06-03	1	S	corn	6	3	603S	5	1	8	1	6	0	4	3	9	28	60
2019	2019-06-03	1	S	corn	6	3	603S	8	1	4	0	4	0	4	2	0	62	77
2019	2019-06-03	1	S	corn	6	4	604S	5	0	0	0	3	1	5	2	0	33	44
2019	2019-06-03	1	S	corn	6	4	604S	8	0	2	2	3	0	6	2	0	19	34
2019	2019-06-03	1	S	corn	6	5	605S	5	2	1	1	3	0	6	4	0	5	22
2019	2019-06-03	1	S	corn	6	5	605S	8	2	1	0	5	0	8	2	0	5	23
2019	2019-06-03	1	S	corn	6	6	606S	5	3	1	5	3	0	3	0	0	42	57
2019	2019-06-03	1	S	corn	6	6	606S	8	1	1	1	6	0	1	0	0	42	52
2019	2019-08-19	2	S	corn	1	1	101S	5	3	3	3	7		0	12	0	4	32
2019	2019-08-19	2	S	corn	1	1	101S	8												MISSING IN FIELD
2019	2019-08-19	2	S	corn	1	2	102S	5	3	0	3	1		1	0	1	2	11
2019	2019-08-19	2	S	corn	1	2	102S	8												MISSING IN FIELD
2019	2019-08-19	2	S	corn	1	3	103S	5												MISSING IN FIELD
2019	2019-08-19	2	S	corn	1	3	103S	8												MISSING IN FIELD
2019	2019-08-19	2	S	corn	1	4	104S	5												MISSING IN FIELD
2019	2019-08-19	2	S	corn	1	4	104S	8												MISSING IN FIELD
2019	2019-08-19	2	S	corn	1	5	105S	5												MISSING IN FIELD
2019	2019-08-19	2	S	corn	1	5	105S	8												MISSING IN FIELD
2019	2019-08-19	2	S	corn	1	6	106S	5												MISSING IN FIELD
2019	2019-08-19	2	S	corn	1	6	106S	8	15	5	3	5		0	7	1	17	53
2019	2019-08-19	2	S	corn	2	1	201S	5												MISSING IN FIELD
2019	2019-08-19	2	S	corn	2	1	201S	8												MISSING IN FIELD
2019	2019-08-19	2	S	corn	2	2	202S	5	10	2	2	4		0	12	1	8	39
2019	2019-08-19	2	S	corn	2	2	202S	8												MISSING IN FIELD
2019	2019-08-19	2	S	corn	2	3	203S	5												MISSING IN FIELD
2019	2019-08-19	2	S	corn	2	3	203S	8	2	1	7	7		1	14	2	4	38
2019	2019-08-19	2	S	corn	2	4	204S	5	0	0	4	5		0	5	1	2	17
2019	2019-08-19	2	S	corn	2	4	204S	8												MISSING IN FIELD
2019	2019-08-19	2	S	corn	2	5	205S	5	5	0	3	1		4	10	1	7	31
2019	2019-08-19	2	S	corn	2	5	205S	8												MISSING IN FIELD
2019	2019-08-19	2	S	corn	2	6	206S	5												MISSING IN FIELD
2019	2019-08-19	2	S	corn	2	6	206S	8												MISSING IN FIELD
2019	2019-08-19	2	S	corn	3	1	301S	5												MISSING IN FIELD
2019	2019-08-19	2	S	corn	3	1	301S	8												MISSING IN FIELD
2019	2019-08-19	2	S	corn	3	2	302S	5												MISSING IN FIELD
2019	2019-08-19	2	S	corn	3	2	302S	8												MISSING IN FIELD
2019	2019-08-19	2	S	corn	3	3	303S	5												MISSING IN FIELD
2019	2019-08-19	2	S	corn	3	3	303S	8												MISSING IN FIELD
2019	2019-08-19	2	S	corn	3	4	304S	5												MISSING IN FIELD
2019	2019-08-19	2	S	corn	3	4	304S	8												MISSING IN FIELD
2019	2019-08-19	2	S	corn	3	5	305S	5												MISSING IN FIELD
2019	2019-08-19	2	S	corn	3	5	305S	8												MISSING IN FIELD
2019	2019-08-19	2	S	corn	3	6	306S	5												MISSING IN FIELD
2019	2019-08-19	2	S	corn	3	6	306S	8												MISSING IN FIELD
2019	2019-08-19	2	S	corn	4	1	401S	5												MISSING IN FIELD
2019	2019-08-19	2	S	corn	4	1	401S	8												MISSING IN FIELD
2019	2019-08-19	2	S	corn	4	2	402S	5												MISSING IN FIELD
2019	2019-08-19	2	S	corn	4	2	402S	8												MISSING IN FIELD
2019	2019-08-19	2	S	corn	4	3	403S	5												MISSING IN FIELD
2019	2019-08-19	2	S	corn	4	3	403S	8												MISSING IN FIELD
2019	2019-08-19	2	S	corn	4	4	404S	5												MISSING IN FIELD
2019	2019-08-19	2	S	corn	4	4	404S	8												MISSING IN FIELD
2019	2019-08-19	2	S	corn	4	5	405S	5												MISSING IN FIELD
2019	2019-08-19	2	S	corn	4	5	405S	8												MISSING IN FIELD
2019	2019-08-19	2	S	corn	4	6	406S	5												MISSING IN FIELD
2019	2019-08-19	2	S	corn	4	6	406S	8												MISSING IN FIELD
2019	2019-08-19	2	S	corn	5	1	501S	5	0	2	2	2	1	0	1	0	10	18
2019	2019-08-19	2	S	corn	5	1	501S	8	2	2	1	2	0	1	4	0	12	24
2019	2019-08-19	2	S	corn	5	2	502S	5	4	5	0	3	0	1	8	0	8	29
2019	2019-08-19	2	S	corn	5	2	502S	8	0	0	1	2	0	1	7	0	1	12
2019	2019-08-19	2	S	corn	5	3	503S	5	0	0	1	0	0	0	4	1	11	17
2019	2019-08-19	2	S	corn	5	3	503S	8	1	2	0	3	1	0	5	0	3	15
2019	2019-08-19	2	S	corn	5	4	504S	5												MISSING IN FIELD
2019	2019-08-19	2	S	corn	5	4	504S	8												MISSING IN FIELD
2019	2019-08-19	2	S	corn	5	5	505S	5	0	1	0	0		0	5	0	4	10
2019	2019-08-19	2	S	corn	5	5	505S	8												MISSING IN FIELD
2019	2019-08-19	2	S	corn	5	6	506S	5												MISSING IN FIELD
2019	2019-08-19	2	S	corn	5	6	506S	8												MISSING IN FIELD
2019	2019-08-19	2	S	corn	6	1	601S	5	0	0	0	2	0	0	3	0	4	9
2019	2019-08-19	2	S	corn	6	1	601S	8	0	0	0	1	0	0	0	0	10	11
2019	2019-08-19	2	S	corn	6	2	602S	5	1	0	1	2	0	2	1	0	8	15
2019	2019-08-19	2	S	corn	6	2	602S	8	0	1	0	0	0	1	0	0	12	14
2019	2019-08-19	2	S	corn	6	3	603S	5												MISSING IN FIELD
2019	2019-08-19	2	S	corn	6	3	603S	8												MISSING IN FIELD
2019	2019-08-19	2	S	corn	6	4	604S	5												MISSING IN FIELD
2019	2019-08-19	2	S	corn	6	4	604S	8	0	0	4	2	0	0	2	1	7	16
2019	2019-08-19	2	S	corn	6	5	605S	5	0	0	2	3	0	0	3	0	10	18
2019	2019-08-19	2	S	corn	6	5	605S	8	0	3	15	4	0	0	2	0	6	30
2019	2019-08-19	2	S	corn	6	6	606S	5	0	2	2	1	0	0	2	0	2	9
2019	2019-08-19	2	S	corn	6	6	606S	8	0	1	0	0	0	0	0	1	6	8

## Sheet: meta-data
Column Header	Details
Year	2017-2019
Date	in Month/Day/Year format
Sample period	1= June/July or 2 = August/September
Field	North or South
Crop	Corn or Soy
Block	Blocking N-S
Plot	Blocking E-W
Plot_ID	unique plot Id that includes information on block, plot and field (see below)
row	The row in which the pitfall was placed
carabids	Carabidae
rove	Staphylinidae
other_beetles	All other beetles
spiders	Aranae adults
juvenile spiders	Aranae juveniles
harvestmen	Opilliones
millipedes	Diplopoda
centipedes	Chilopoda
ants	Formicidae
total	All predators added
checked	date (MM/DD/YEAR) that samples were double checked
Notes
