# Supplementary material for: Insecticides may facilitate the escape of weeds from biological control
Source: PeerJ. 2025 Jan 13;13:e18597. doi: 10.7717/peerj.18597 (PMC11737330; doi:10.7717/peerj.18597)
Supplement: Supplemental Information 11 — Sentinel weeds seed predation measured for 48h three times each year using sentinel foxtail and pigweed seeds. [file peerj-13-18597-s011.xlsx]

## Sheet: data
Year	Date	Month	Time	Field	Block	Row	Plot_ID	row	PW	FT	Notes
2017	2017-06-16	June	1Early	S	1	1	101S	4	30	17
2017	2017-06-16	June	1Early	S	1	1	101S	7	29	20
2017	2017-06-16	June	1Early	S	1	1	101S	12	28	19
2017	2017-06-16	June	1Early	S	1	2	102S	4	30	20
2017	2017-06-16	June	1Early	S	1	2	102S	7	30	22
2017	2017-06-16	June	1Early	S	1	2	102S	12	11	20
2017	2017-06-16	June	1Early	S	1	3	103S	4	30	18
2017	2017-06-16	June	1Early	S	1	3	103S	7	27	18
2017	2017-06-16	June	1Early	S	1	3	103S	12	37	21
2017	2017-06-16	June	1Early	S	1	4	104S	4	21	22
2017	2017-06-16	June	1Early	S	1	4	104S	7	32	20
2017	2017-06-16	June	1Early	S	1	4	104S	12	28	18
2017	2017-06-16	June	1Early	S	1	5	105S	4	28	20
2017	2017-06-16	June	1Early	S	1	5	105S	7	30	20
2017	2017-06-16	June	1Early	S	1	5	105S	12	29	20
2017	2017-06-16	June	1Early	S	1	6	106S	4	30	20
2017	2017-06-16	June	1Early	S	1	6	106S	7	29	18
2017	2017-06-16	June	1Early	S	1	6	106S	12	28	19
2017	2017-06-16	June	1Early	S	2	1	201S	4	30	17
2017	2017-06-16	June	1Early	S	2	1	201S	7	30	20
2017	2017-06-16	June	1Early	S	2	1	201S	12	29	20	highlighted?
2017	2017-06-16	June	1Early	S	2	2	202S	4	29	20
2017	2017-06-16	June	1Early	S	2	2	202S	7	31	21
2017	2017-06-16	June	1Early	S	2	2	202S	12	30	19
2017	2017-06-16	June	1Early	S	2	3	203S	4	16	20
2017	2017-06-16	June	1Early	S	2	3	203S	7	30	20
2017	2017-06-16	June	1Early	S	2	3	203S	12	29	20
2017	2017-06-16	June	1Early	S	2	4	204S	4	28	19
2017	2017-06-16	June	1Early	S	2	4	204S	7	29	19
2017	2017-06-16	June	1Early	S	2	4	204S	12	24	15
2017	2017-06-16	June	1Early	S	2	5	205S	4	29	17
2017	2017-06-16	June	1Early	S	2	5	205S	7	30	20
2017	2017-06-16	June	1Early	S	2	5	205S	12	22	17
2017	2017-06-16	June	1Early	S	2	6	206S	4	32	21
2017	2017-06-16	June	1Early	S	2	6	206S	7	29	17
2017	2017-06-16	June	1Early	S	2	6	206S	12	28	19
2017	2017-06-16	June	1Early	S	3	1	301S	4	29	20
2017	2017-06-16	June	1Early	S	3	1	301S	7	29	21
2017	2017-06-16	June	1Early	S	3	1	301S	12	31	23
2017	2017-06-16	June	1Early	S	3	2	302S	4	30	21
2017	2017-06-16	June	1Early	S	3	2	302S	7	27	18
2017	2017-06-16	June	1Early	S	3	2	302S	12	27	22
2017	2017-06-16	June	1Early	S	3	3	303S	4	23	16
2017	2017-06-16	June	1Early	S	3	3	303S	7	27	18
2017	2017-06-16	June	1Early	S	3	3	303S	12	30	18
2017	2017-06-16	June	1Early	S	3	4	304S	4	28	18
2017	2017-06-16	June	1Early	S	3	4	304S	7	30	20
2017	2017-06-16	June	1Early	S	3	4	304S	12	29	20
2017	2017-06-16	June	1Early	S	3	5	305S	4	32	19
2017	2017-06-16	June	1Early	S	3	5	305S	7	30	19
2017	2017-06-16	June	1Early	S	3	5	305S	12	28	20
2017	2017-06-16	June	1Early	S	3	6	306S	4	29	20
2017	2017-06-16	June	1Early	S	3	6	306S	7	27	18
2017	2017-06-16	June	1Early	S	3	6	306S	12	25	20
2017	2017-06-16	June	1Early	S	4	1	401S	4	29	20
2017	2017-06-16	June	1Early	S	4	1	401S	7	29	18
2017	2017-06-16	June	1Early	S	4	1	401S	12	28	17
2017	2017-06-16	June	1Early	S	4	2	402S	4	28	20
2017	2017-06-16	June	1Early	S	4	2	402S	7	25	16
2017	2017-06-16	June	1Early	S	4	2	402S	12	29	20
2017	2017-06-16	June	1Early	S	4	3	403S	4	28	17
2017	2017-06-16	June	1Early	S	4	3	403S	7	25	19
2017	2017-06-16	June	1Early	S	4	3	403S	12	29	16
2017	2017-06-16	June	1Early	S	4	4	404S	4	30	17
2017	2017-06-16	June	1Early	S	4	4	404S	7	29	19
2017	2017-06-16	June	1Early	S	4	4	404S	12	28	16
2017	2017-06-16	June	1Early	S	4	5	405S	4	28	20
2017	2017-06-16	June	1Early	S	4	5	405S	7	8	12
2017	2017-06-16	June	1Early	S	4	5	405S	12	3	12
2017	2017-06-16	June	1Early	S	4	6	406S	4	29	17
2017	2017-06-16	June	1Early	S	4	6	406S	7	25	15
2017	2017-06-16	June	1Early	S	4	6	406S	12	26	15
2017	2017-06-16	June	1Early	S	5	1	501S	4	30	20
2017	2017-06-16	June	1Early	S	5	1	501S	7	30	24
2017	2017-06-16	June	1Early	S	5	1	501S	12	31	18
2017	2017-06-16	June	1Early	S	5	2	502S	4	30	21
2017	2017-06-16	June	1Early	S	5	2	502S	7	30	19
2017	2017-06-16	June	1Early	S	5	2	502S	12	29	18
2017	2017-06-16	June	1Early	S	5	3	503S	4	31	20
2017	2017-06-16	June	1Early	S	5	3	503S	7	31	24
2017	2017-06-16	June	1Early	S	5	3	503S	12	29	18
2017	2017-06-16	June	1Early	S	5	4	504S	4	30	21
2017	2017-06-16	June	1Early	S	5	4	504S	7	27	17
2017	2017-06-16	June	1Early	S	5	4	504S	12	28	20
2017	2017-06-16	June	1Early	S	5	5	505S	4	30	21
2017	2017-06-16	June	1Early	S	5	5	505S	7	31	19
2017	2017-06-16	June	1Early	S	5	5	505S	12	30	20
2017	2017-06-16	June	1Early	S	5	6	506S	4	29	20
2017	2017-06-16	June	1Early	S	5	6	506S	7	30	19
2017	2017-06-16	June	1Early	S	5	6	506S	12	29	20
2017	2017-06-16	June	1Early	S	6	1	601S	4	29	20
2017	2017-06-16	June	1Early	S	6	1	601S	7	25	20
2017	2017-06-16	June	1Early	S	6	1	601S	12	30	20
2017	2017-06-16	June	1Early	S	6	2	602S	4	28	18
2017	2017-06-16	June	1Early	S	6	2	602S	7	29	22
2017	2017-06-16	June	1Early	S	6	2	602S	12	30	18
2017	2017-06-16	June	1Early	S	6	3	603S	4	26	18
2017	2017-06-16	June	1Early	S	6	3	603S	7	29	22
2017	2017-06-16	June	1Early	S	6	3	603S	12	30	18
2017	2017-06-16	June	1Early	S	6	4	604S	4	28	18
2017	2017-06-16	June	1Early	S	6	4	604S	7	29	20
2017	2017-06-16	June	1Early	S	6	4	604S	12	30	20
2017	2017-06-16	June	1Early	S	6	5	605S	4	28	22
2017	2017-06-16	June	1Early	S	6	5	605S	7	30	17
2017	2017-06-16	June	1Early	S	6	5	605S	12	30	12
2017	2017-06-16	June	1Early	S	6	6	606S	4	30	16
2017	2017-06-16	June	1Early	S	6	6	606S	7	29	18
2017	2017-06-16	June	1Early	S	6	6	606S	12	13	15
2017	2017-06-29	June	1Early	N	1	1	101N	4	29	17
2017	2017-06-29	June	1Early	N	1	1	101N	7	30	20
2017	2017-06-29	June	1Early	N	1	1	101N	12	30	19
2017	2017-06-29	June	1Early	N	1	2	102N	4	30	20
2017	2017-06-29	June	1Early	N	1	2	102N	7	20	18
2017	2017-06-29	June	1Early	N	1	2	102N	12	30	20
2017	2017-06-29	June	1Early	N	1	3	103N	4	30	17
2017	2017-06-29	June	1Early	N	1	3	103N	7	29	20
2017	2017-06-29	June	1Early	N	1	3	103N	12	29	10
2017	2017-06-29	June	1Early	N	1	4	104N	4	31	20
2017	2017-06-29	June	1Early	N	1	4	104N	7	33	12
2017	2017-06-29	June	1Early	N	1	4	104N	12	20	6
2017	2017-06-29	June	1Early	N	1	5	105N	4	27	13
2017	2017-06-29	June	1Early	N	1	5	105N	7	29	21
2017	2017-06-29	June	1Early	N	1	5	105N	12	24	20
2017	2017-06-29	June	1Early	N	1	6	106N	4	29	10
2017	2017-06-29	June	1Early	N	1	6	106N	7	27	15
2017	2017-06-29	June	1Early	N	1	6	106N	12	30	14
2017	2017-06-29	June	1Early	N	2	1	201N	4	30	20
2017	2017-06-29	June	1Early	N	2	1	201N	7	29	12
2017	2017-06-29	June	1Early	N	2	1	201N	12	20	15
2017	2017-06-29	June	1Early	N	2	2	202N	4	30	18
2017	2017-06-29	June	1Early	N	2	2	202N	7	28	15
2017	2017-06-29	June	1Early	N	2	2	202N	12	20	17
2017	2017-06-29	June	1Early	N	2	3	203N	4	30	17
2017	2017-06-29	June	1Early	N	2	3	203N	7	20	11
2017	2017-06-29	June	1Early	N	2	3	203N	12	29	4
2017	2017-06-29	June	1Early	N	2	4	204N	4	30	19
2017	2017-06-29	June	1Early	N	2	4	204N	7	30	18
2017	2017-06-29	June	1Early	N	2	4	204N	12	29	20
2017	2017-06-29	June	1Early	N	2	5	205N	4	30	19
2017	2017-06-29	June	1Early	N	2	5	205N	7	29	18
2017	2017-06-29	June	1Early	N	2	5	205N	12	30	21
2017	2017-06-29	June	1Early	N	2	6	206N	4	32	11
2017	2017-06-29	June	1Early	N	2	6	206N	7	28	10
2017	2017-06-29	June	1Early	N	2	6	206N	12	27	10
2017	2017-06-29	June	1Early	N	3	1	301N	4	18	16
2017	2017-06-29	June	1Early	N	3	1	301N	7	29	20
2017	2017-06-29	June	1Early	N	3	1	301N	12	31	23
2017	2017-06-29	June	1Early	N	3	2	302N	4	30	18
2017	2017-06-29	June	1Early	N	3	2	302N	7	31	19
2017	2017-06-29	June	1Early	N	3	2	302N	12	31	17
2017	2017-06-29	June	1Early	N	3	3	303N	4	1	4
2017	2017-06-29	June	1Early	N	3	3	303N	7	28	17
2017	2017-06-29	June	1Early	N	3	3	303N	12	0	3
2017	2017-06-29	June	1Early	N	3	4	304N	4	30	19
2017	2017-06-29	June	1Early	N	3	4	304N	7	29	19
2017	2017-06-29	June	1Early	N	3	4	304N	12	30	22
2017	2017-06-29	June	1Early	N	3	5	305N	4	25	15
2017	2017-06-29	June	1Early	N	3	5	305N	7	28	20
2017	2017-06-29	June	1Early	N	3	5	305N	12	30	17
2017	2017-06-29	June	1Early	N	3	6	306N	4	31	20
2017	2017-06-29	June	1Early	N	3	6	306N	7	30	19
2017	2017-06-29	June	1Early	N	3	6	306N	12	29	20
2017	2017-06-29	June	1Early	N	4	1	401N	4	26	20
2017	2017-06-29	June	1Early	N	4	1	401N	7	28	28	*PW & FT were both written as 28, erased, and never replaced with another number
2017	2017-06-29	June	1Early	N	4	1	401N	12	29	22
2017	2017-06-29	June	1Early	N	4	2	402N	4	31	19
2017	2017-06-29	June	1Early	N	4	2	402N	7	17	18
2017	2017-06-29	June	1Early	N	4	2	402N	12	20	12
2017	2017-06-29	June	1Early	N	4	3	403N	4	32	19
2017	2017-06-29	June	1Early	N	4	3	403N	7	31	20
2017	2017-06-29	June	1Early	N	4	3	403N	12	2	9
2017	2017-06-29	June	1Early	N	4	4	404N	4	30	17
2017	2017-06-29	June	1Early	N	4	4	404N	7	30	18
2017	2017-06-29	June	1Early	N	4	4	404N	12	30	17
2017	2017-06-29	June	1Early	N	4	5	405N	4	24	11
2017	2017-06-29	June	1Early	N	4	5	405N	7	26	18
2017	2017-06-29	June	1Early	N	4	5	405N	12	25	18
2017	2017-06-29	June	1Early	N	4	6	406N	4	27	17
2017	2017-06-29	June	1Early	N	4	6	406N	7	30	17
2017	2017-06-29	June	1Early	N	4	6	406N	12	31	18
2017	2017-06-29	June	1Early	N	5	1	501N	4	23	13
2017	2017-06-29	June	1Early	N	5	1	501N	7	21	17
2017	2017-06-29	June	1Early	N	5	1	501N	12	29	17
2017	2017-06-29	June	1Early	N	5	2	502N	4	30	19
2017	2017-06-29	June	1Early	N	5	2	502N	7	30	18
2017	2017-06-29	June	1Early	N	5	2	502N	12	32	20
2017	2017-06-29	June	1Early	N	5	3	503N	4	29	23
2017	2017-06-29	June	1Early	N	5	3	503N	7	29	19
2017	2017-06-29	June	1Early	N	5	3	503N	12	27	18
2017	2017-06-29	June	1Early	N	5	4	504N	4	30	21
2017	2017-06-29	June	1Early	N	5	4	504N	7	31	18
2017	2017-06-29	June	1Early	N	5	4	504N	12	33	20
2017	2017-06-29	June	1Early	N	5	5	505N	4	30	20
2017	2017-06-29	June	1Early	N	5	5	505N	7	30	20
2017	2017-06-29	June	1Early	N	5	5	505N	12	30	15
2017	2017-06-29	June	1Early	N	5	6	506N	4	35	21
2017	2017-06-29	June	1Early	N	5	6	506N	7	31	19
2017	2017-06-29	June	1Early	N	5	6	506N	12	27	17
2017	2017-06-29	June	1Early	N	6	1	601N	4	30	20
2017	2017-06-29	June	1Early	N	6	1	601N	7	28	6
2017	2017-06-29	June	1Early	N	6	1	601N	12	28	20
2017	2017-06-29	June	1Early	N	6	2	602N	4	31	20
2017	2017-06-29	June	1Early	N	6	2	602N	7	33	19
2017	2017-06-29	June	1Early	N	6	2	602N	12	25	19
2017	2017-06-29	June	1Early	N	6	3	603N	4	31	19
2017	2017-06-29	June	1Early	N	6	3	603N	7	11	29
2017	2017-06-29	June	1Early	N	6	3	603N	12	30	17
2017	2017-06-29	June	1Early	N	6	4	604N	4	32	17
2017	2017-06-29	June	1Early	N	6	4	604N	7	32	20
2017	2017-06-29	June	1Early	N	6	4	604N	12	24	20
2017	2017-06-29	June	1Early	N	6	5	605N	4	20	20
2017	2017-06-29	June	1Early	N	6	5	605N	7	26	21
2017	2017-06-29	June	1Early	N	6	5	605N	12	30	21
2017	2017-06-29	June	1Early	N	6	6	606N	4	29	16
2017	2017-06-29	June	1Early	N	6	6	606N	7	30	21
2017	2017-06-29	June	1Early	N	6	6	606N	12	29	17
2018	2018-06-20	June/July	1Early	N	1	1	101N	4	12	27
2018	2018-06-20	June/July	1Early	N	1	1	101N	7	29	2
2018	2018-06-20	June/July	1Early	N	1	1	101N	12	30	12
2018	2018-06-20	June/July	1Early	N	1	2	102N	4	23	11
2018	2018-06-20	June/July	1Early	N	1	2	102N	7	28	17
2018	2018-06-20	June/July	1Early	N	1	2	102N	12	27	16
2018	2018-06-20	June/July	1Early	N	1	3	103N	4	28	13
2018	2018-06-20	June/July	1Early	N	1	3	103N	7	23	11
2018	2018-06-20	June/July	1Early	N	1	3	103N	12	29	17
2018	2018-06-20	June/July	1Early	N	1	4	104N	4	22	17
2018	2018-06-20	June/July	1Early	N	1	4	104N	7	27	8
2018	2018-06-20	June/July	1Early	N	1	4	104N	12	27	15
2018	2018-06-20	June/July	1Early	N	1	5	105N	4	27	14
2018	2018-06-20	June/July	1Early	N	1	5	105N	7	30	12
2018	2018-06-20	June/July	1Early	N	1	5	105N	12	23	4
2018	2018-06-20	June/July	1Early	N	1	6	106N	4	19	14
2018	2018-06-20	June/July	1Early	N	1	6	106N	7	17	14
2018	2018-06-20	June/July	1Early	N	1	6	106N	12	12	8
2018	2018-06-20	June/July	1Early	N	2	1	201N	4	29	9
2018	2018-06-20	June/July	1Early	N	2	1	201N	7	28	9
2018	2018-06-20	June/July	1Early	N	2	1	201N	12	26	4
2018	2018-06-20	June/July	1Early	N	2	2	202N	4	30	9
2018	2018-06-20	June/July	1Early	N	2	2	202N	7	27	8
2018	2018-06-20	June/July	1Early	N	2	2	202N	12	28	11
2018	2018-06-20	June/July	1Early	N	2	3	203N	4	24	10
2018	2018-06-20	June/July	1Early	N	2	3	203N	7
2018	2018-06-20	June/July	1Early	N	2	3	203N	12	25	11
2018	2018-06-20	June/July	1Early	N	2	4	204N	4	29	13
2018	2018-06-20	June/July	1Early	N	2	4	204N	7	30	6
2018	2018-06-20	June/July	1Early	N	2	4	204N	12	23	13
2018	2018-06-20	June/July	1Early	N	2	5	205N	4	28	8
2018	2018-06-20	June/July	1Early	N	2	5	205N	7	15	6
2018	2018-06-20	June/July	1Early	N	2	5	205N	12	21	17
2018	2018-06-20	June/July	1Early	N	2	6	206N	4	17	6
2018	2018-06-20	June/July	1Early	N	2	6	206N	7	26	10
2018	2018-06-20	June/July	1Early	N	2	6	206N	12	24	12
2018	2018-06-20	June/July	1Early	N	3	1	301N	4	20	11
2018	2018-06-20	June/July	1Early	N	3	1	301N	7	23	10
2018	2018-06-20	June/July	1Early	N	3	1	301N	12	23	5
2018	2018-06-20	June/July	1Early	N	3	2	302N	4	30	12
2018	2018-06-20	June/July	1Early	N	3	2	302N	7	20	7
2018	2018-06-20	June/July	1Early	N	3	2	302N	12	23	3
2018	2018-06-20	June/July	1Early	N	3	3	303N	4	30	16
2018	2018-06-20	June/July	1Early	N	3	3	303N	7	7	9
2018	2018-06-20	June/July	1Early	N	3	3	303N	12	26	20
2018	2018-06-20	June/July	1Early	N	3	4	304N	4	30	16
2018	2018-06-20	June/July	1Early	N	3	4	304N	7	22	10
2018	2018-06-20	June/July	1Early	N	3	4	304N	12	26	12
2018	2018-06-20	June/July	1Early	N	3	5	305N	4	29	16
2018	2018-06-20	June/July	1Early	N	3	5	305N	7	26	3
2018	2018-06-20	June/July	1Early	N	3	5	305N	12	23	4
2018	2018-06-20	June/July	1Early	N	3	6	306N	4	30	11
2018	2018-06-20	June/July	1Early	N	3	6	306N	7	23	14
2018	2018-06-20	June/July	1Early	N	3	6	306N	12	19	9
2018	2018-06-20	June/July	1Early	N	4	1	401N	4	25	6
2018	2018-06-20	June/July	1Early	N	4	1	401N	7	23	16
2018	2018-06-20	June/July	1Early	N	4	1	401N	12
2018	2018-06-20	June/July	1Early	N	4	2	402N	4	27	5
2018	2018-06-20	June/July	1Early	N	4	2	402N	7	25	8
2018	2018-06-20	June/July	1Early	N	4	2	402N	12	30	11
2018	2018-06-20	June/July	1Early	N	4	3	403N	4	24	12
2018	2018-06-20	June/July	1Early	N	4	3	403N	7	22	10
2018	2018-06-20	June/July	1Early	N	4	3	403N	12	26	11
2018	2018-06-20	June/July	1Early	N	4	4	404N	4	22	12
2018	2018-06-20	June/July	1Early	N	4	4	404N	7	29	13
2018	2018-06-20	June/July	1Early	N	4	4	404N	12	23	9
2018	2018-06-20	June/July	1Early	N	4	5	405N	4	21	9
2018	2018-06-20	June/July	1Early	N	4	5	405N	7	26	10
2018	2018-06-20	June/July	1Early	N	4	5	405N	12	14	6
2018	2018-06-20	June/July	1Early	N	4	6	406N	4	25	20
2018	2018-06-20	June/July	1Early	N	4	6	406N	7
2018	2018-06-20	June/July	1Early	N	4	6	406N	12	28	21
2018	2018-06-20	June/July	1Early	N	5	1	501N	4	6	13
2018	2018-06-20	June/July	1Early	N	5	1	501N	7	27
2018	2018-06-20	June/July	1Early	N	5	1	501N	12	21	11
2018	2018-06-20	June/July	1Early	N	5	2	502N	4	28	16
2018	2018-06-20	June/July	1Early	N	5	2	502N	7	30	6
2018	2018-06-20	June/July	1Early	N	5	2	502N	12	12	19
2018	2018-06-20	June/July	1Early	N	5	3	503N	4	20	7
2018	2018-06-20	June/July	1Early	N	5	3	503N	7	27	14
2018	2018-06-20	June/July	1Early	N	5	3	503N	12	20	6
2018	2018-06-20	June/July	1Early	N	5	4	504N	4	24	11
2018	2018-06-20	June/July	1Early	N	5	4	504N	7	26	13
2018	2018-06-20	June/July	1Early	N	5	4	504N	12	23	17
2018	2018-06-20	June/July	1Early	N	5	5	505N	4	30	5
2018	2018-06-20	June/July	1Early	N	5	5	505N	7	21	14
2018	2018-06-20	June/July	1Early	N	5	5	505N	12	30	12
2018	2018-06-20	June/July	1Early	N	5	6	506N	4	28	20
2018	2018-06-20	June/July	1Early	N	5	6	506N	7	14	16
2018	2018-06-20	June/July	1Early	N	5	6	506N	12	21	13
2018	2018-06-20	June/July	1Early	N	6	1	601N	4	29	16
2018	2018-06-20	June/July	1Early	N	6	1	601N	7	25	20
2018	2018-06-20	June/July	1Early	N	6	1	601N	12	28	19
2018	2018-06-20	June/July	1Early	N	6	2	602N	4	7	1
2018	2018-06-20	June/July	1Early	N	6	2	602N	7	23	12
2018	2018-06-20	June/July	1Early	N	6	2	602N	12	27	15
2018	2018-06-20	June/July	1Early	N	6	3	603N	4	26	14
2018	2018-06-20	June/July	1Early	N	6	3	603N	7
2018	2018-06-20	June/July	1Early	N	6	3	603N	12	23	10
2018	2018-06-20	June/July	1Early	N	6	4	604N	4	22	19
2018	2018-06-20	June/July	1Early	N	6	4	604N	7	24	17
2018	2018-06-20	June/July	1Early	N	6	4	604N	12	29	14
2018	2018-06-20	June/July	1Early	N	6	5	605N	4	25	13
2018	2018-06-20	June/July	1Early	N	6	5	605N	7	30	14
2018	2018-06-20	June/July	1Early	N	6	5	605N	12	26	10
2018	2018-06-20	June/July	1Early	N	6	6	606N	4	28	20
2018	2018-06-20	June/July	1Early	N	6	6	606N	7	19	16
2018	2018-06-20	June/July	1Early	N	6	6	606N	12	22	12
2018	2018-07-11	June/July	1Early	S	1	1	101S	4	26	19
2018	2018-07-11	June/July	1Early	S	1	1	101S	7	26	18
2018	2018-07-11	June/July	1Early	S	1	1	101S	12	25	17
2018	2018-07-11	June/July	1Early	S	1	2	102S	4	9	3
2018	2018-07-11	June/July	1Early	S	1	2	102S	7	27	18
2018	2018-07-11	June/July	1Early	S	1	2	102S	12	24	7
2018	2018-07-11	June/July	1Early	S	1	3	103S	4	16	15
2018	2018-07-11	June/July	1Early	S	1	3	103S	7	27	11
2018	2018-07-11	June/July	1Early	S	1	3	103S	12	16	14
2018	2018-07-11	June/July	1Early	S	1	4	104S	4	30	12
2018	2018-07-11	June/July	1Early	S	1	4	104S	7	27	8
2018	2018-07-11	June/July	1Early	S	1	4	104S	12	24	16
2018	2018-07-11	June/July	1Early	S	1	5	105S	4	30	18
2018	2018-07-11	June/July	1Early	S	1	5	105S	7	30	16
2018	2018-07-11	June/July	1Early	S	1	5	105S	12	27	14
2018	2018-07-11	June/July	1Early	S	1	6	106S	4	25	20
2018	2018-07-11	June/July	1Early	S	1	6	106S	7	29	18
2018	2018-07-11	June/July	1Early	S	1	6	106S	12	24	17
2018	2018-07-11	June/July	1Early	S	2	1	201S	4	16	12
2018	2018-07-11	June/July	1Early	S	2	1	201S	7	26	15
2018	2018-07-11	June/July	1Early	S	2	1	201S	12	25	20
2018	2018-07-11	June/July	1Early	S	2	2	202S	4	27	19
2018	2018-07-11	June/July	1Early	S	2	2	202S	7	30	19
2018	2018-07-11	June/July	1Early	S	2	2	202S	12	30	24
2018	2018-07-11	June/July	1Early	S	2	3	203S	4	23	18
2018	2018-07-11	June/July	1Early	S	2	3	203S	7	22	17
2018	2018-07-11	June/July	1Early	S	2	3	203S	12	24	15
2018	2018-07-11	June/July	1Early	S	2	4	204S	4	22	16
2018	2018-07-11	June/July	1Early	S	2	4	204S	7	19	14
2018	2018-07-11	June/July	1Early	S	2	4	204S	12	20	17
2018	2018-07-11	June/July	1Early	S	2	5	205S	4	25	12
2018	2018-07-11	June/July	1Early	S	2	5	205S	7	28	14
2018	2018-07-11	June/July	1Early	S	2	5	205S	12	27	19
2018	2018-07-11	June/July	1Early	S	2	6	206S	4	20	17
2018	2018-07-11	June/July	1Early	S	2	6	206S	7	30	19
2018	2018-07-11	June/July	1Early	S	2	6	206S	12	26	19
2018	2018-07-11	June/July	1Early	S	3	1	301S	4	18	15
2018	2018-07-11	June/July	1Early	S	3	1	301S	7	29	6
2018	2018-07-11	June/July	1Early	S	3	1	301S	12	26	12
2018	2018-07-11	June/July	1Early	S	3	2	302S	4	24	17
2018	2018-07-11	June/July	1Early	S	3	2	302S	7	3	2
2018	2018-07-11	June/July	1Early	S	3	2	302S	12	26	19
2018	2018-07-11	June/July	1Early	S	3	3	303S	4	11	13
2018	2018-07-11	June/July	1Early	S	3	3	303S	7	14	10
2018	2018-07-11	June/July	1Early	S	3	3	303S	12	9	12
2018	2018-07-11	June/July	1Early	S	3	4	304S	4	22	16
2018	2018-07-11	June/July	1Early	S	3	4	304S	7	4	10
2018	2018-07-11	June/July	1Early	S	3	4	304S	12	29	19
2018	2018-07-11	June/July	1Early	S	3	5	305S	4	28	15
2018	2018-07-11	June/July	1Early	S	3	5	305S	7	2	11
2018	2018-07-11	June/July	1Early	S	3	5	305S	12	18	16
2018	2018-07-11	June/July	1Early	S	3	6	306S	4	1	17
2018	2018-07-11	June/July	1Early	S	3	6	306S	7	30	20
2018	2018-07-11	June/July	1Early	S	3	6	306S	12	23	17
2018	2018-07-11	June/July	1Early	S	4	1	401S	4	28	17
2018	2018-07-11	June/July	1Early	S	4	1	401S	7	27	17
2018	2018-07-11	June/July	1Early	S	4	1	401S	12	0	1
2018	2018-07-11	June/July	1Early	S	4	2	402S	4	26	18
2018	2018-07-11	June/July	1Early	S	4	2	402S	7	21	12
2018	2018-07-11	June/July	1Early	S	4	2	402S	12	27	19
2018	2018-07-11	June/July	1Early	S	4	3	403S	4	17	8
2018	2018-07-11	June/July	1Early	S	4	3	403S	7	10	13
2018	2018-07-11	June/July	1Early	S	4	3	403S	12	29	12
2018	2018-07-11	June/July	1Early	S	4	4	404S	4	9	16
2018	2018-07-11	June/July	1Early	S	4	4	404S	7	28	15
2018	2018-07-11	June/July	1Early	S	4	4	404S	12	27	17
2018	2018-07-11	June/July	1Early	S	4	5	405S	4	25	4
2018	2018-07-11	June/July	1Early	S	4	5	405S	7	27	12
2018	2018-07-11	June/July	1Early	S	4	5	405S	12	26	17
2018	2018-07-11	June/July	1Early	S	4	6	406S	4	22	18
2018	2018-07-11	June/July	1Early	S	4	6	406S	7	21	19
2018	2018-07-11	June/July	1Early	S	4	6	406S	12	26	17
2018	2018-07-11	June/July	1Early	S	5	1	501S	4	28	20
2018	2018-07-11	June/July	1Early	S	5	1	501S	7	27	16
2018	2018-07-11	June/July	1Early	S	5	1	501S	12	28	9
2018	2018-07-11	June/July	1Early	S	5	2	502S	4	25	16
2018	2018-07-11	June/July	1Early	S	5	2	502S	7	17	12
2018	2018-07-11	June/July	1Early	S	5	2	502S	12	1	20
2018	2018-07-11	June/July	1Early	S	5	3	503S	4	18	13
2018	2018-07-11	June/July	1Early	S	5	3	503S	7	28	18
2018	2018-07-11	June/July	1Early	S	5	3	503S	12	29	15
2018	2018-07-11	June/July	1Early	S	5	4	504S	4	30	20
2018	2018-07-11	June/July	1Early	S	5	4	504S	7	23	16
2018	2018-07-11	June/July	1Early	S	5	4	504S	12	27	6
2018	2018-07-11	June/July	1Early	S	5	5	505S	4	16	14
2018	2018-07-11	June/July	1Early	S	5	5	505S	7	30	17
2018	2018-07-11	June/July	1Early	S	5	5	505S	12	29	17
2018	2018-07-11	June/July	1Early	S	5	6	506S	4	29	8
2018	2018-07-11	June/July	1Early	S	5	6	506S	7	16	17
2018	2018-07-11	June/July	1Early	S	5	6	506S	12	10	18
2018	2018-07-11	June/July	1Early	S	6	1	601S	4	30	20
2018	2018-07-11	June/July	1Early	S	6	1	601S	7	26	15
2018	2018-07-11	June/July	1Early	S	6	1	601S	12	29	20
2018	2018-07-11	June/July	1Early	S	6	2	602S	4	10	3
2018	2018-07-11	June/July	1Early	S	6	2	602S	7	30	18
2018	2018-07-11	June/July	1Early	S	6	2	602S	12	24	18
2018	2018-07-11	June/July	1Early	S	6	3	603S	4	28	15
2018	2018-07-11	June/July	1Early	S	6	3	603S	7	25	13
2018	2018-07-11	June/July	1Early	S	6	3	603S	12	28	28
2018	2018-07-11	June/July	1Early	S	6	4	604S	4	15	2
2018	2018-07-11	June/July	1Early	S	6	4	604S	7	26	20
2018	2018-07-11	June/July	1Early	S	6	4	604S	12	30	20
2018	2018-07-11	June/July	1Early	S	6	5	605S	4	30	20
2018	2018-07-11	June/July	1Early	S	6	5	605S	7	30	20
2018	2018-07-11	June/July	1Early	S	6	5	605S	12	20	19
2018	2018-07-11	June/July	1Early	S	6	6	606S	4	23	18
2018	2018-07-11	June/July	1Early	S	6	6	606S	7	27	17
2018	2018-07-11	June/July	1Early	S	6	6	606S	12	26	18
2019	2019-06-03	June	1Early	S	1	1	101S	4	30	18
2019	2019-06-03	June	1Early	S	1	1	101S	7	28	18
2019	2019-06-03	June	1Early	S	1	1	101S	12	30	20
2019	2019-06-03	June	1Early	S	1	2	102S	4	28	19
2019	2019-06-03	June	1Early	S	1	2	102S	7	29	19
2019	2019-06-03	June	1Early	S	1	2	102S	12	30	18
2019	2019-06-03	June	1Early	S	1	3	103S	4	15	25
2019	2019-06-03	June	1Early	S	1	3	103S	7	25	20
2019	2019-06-03	June	1Early	S	1	3	103S	12	27	15
2019	2019-06-03	June	1Early	S	1	4	104S	4	30	18
2019	2019-06-03	June	1Early	S	1	4	104S	7	30	15
2019	2019-06-03	June	1Early	S	1	4	104S	12	25	18
2019	2019-06-03	June	1Early	S	1	5	105S	4	26	14
2019	2019-06-03	June	1Early	S	1	5	105S	7	29	13
2019	2019-06-03	June	1Early	S	1	5	105S	12	28	17
2019	2019-06-03	June	1Early	S	1	6	106S	4	29	11
2019	2019-06-03	June	1Early	S	1	6	106S	7	26	14
2019	2019-06-03	June	1Early	S	1	6	106S	12	27	19
2019	2019-06-03	June	1Early	S	2	1	201S	4	29	19
2019	2019-06-03	June	1Early	S	2	1	201S	7	29	19
2019	2019-06-03	June	1Early	S	2	1	201S	12	30	15
2019	2019-06-03	June	1Early	S	2	2	202S	4	29	20
2019	2019-06-03	June	1Early	S	2	2	202S	7	28	18
2019	2019-06-03	June	1Early	S	2	2	202S	12	29	16
2019	2019-06-03	June	1Early	S	2	3	203S	4	30	13
2019	2019-06-03	June	1Early	S	2	3	203S	7	30	20
2019	2019-06-03	June	1Early	S	2	3	203S	12	30	17
2019	2019-06-03	June	1Early	S	2	4	204S	4	29	20
2019	2019-06-03	June	1Early	S	2	4	204S	7	30	18
2019	2019-06-03	June	1Early	S	2	4	204S	12	28	16
2019	2019-06-03	June	1Early	S	2	5	205S	4	29	17
2019	2019-06-03	June	1Early	S	2	5	205S	7	30	15
2019	2019-06-03	June	1Early	S	2	5	205S	12	30	20
2019	2019-06-03	June	1Early	S	2	6	206S	4	30	18
2019	2019-06-03	June	1Early	S	2	6	206S	7	30	17
2019	2019-06-03	June	1Early	S	2	6	206S	12	30	18
2019	2019-06-03	June	1Early	S	3	1	301S	4	29	19
2019	2019-06-03	June	1Early	S	3	1	301S	7	27	3
2019	2019-06-03	June	1Early	S	3	1	301S	12	28	19
2019	2019-06-03	June	1Early	S	3	2	302S	4	28	39
2019	2019-06-03	June	1Early	S	3	2	302S	7	28	16
2019	2019-06-03	June	1Early	S	3	2	302S	12	30	20
2019	2019-06-03	June	1Early	S	3	3	303S	4	30	17
2019	2019-06-03	June	1Early	S	3	3	303S	7	29	19
2019	2019-06-03	June	1Early	S	3	3	303S	12	29	20
2019	2019-06-03	June	1Early	S	3	4	304S	4	31	20
2019	2019-06-03	June	1Early	S	3	4	304S	7	30	16
2019	2019-06-03	June	1Early	S	3	4	304S	12	30	19
2019	2019-06-03	June	1Early	S	3	5	305S	4	29	18
2019	2019-06-03	June	1Early	S	3	5	305S	7	28	20
2019	2019-06-03	June	1Early	S	3	5	305S	12	30	19
2019	2019-06-03	June	1Early	S	3	6	306S	4	30	18
2019	2019-06-03	June	1Early	S	3	6	306S	7	30	18
2019	2019-06-03	June	1Early	S	3	6	306S	12	30	20
2019	2019-06-03	June	1Early	S	4	1	401S	4	30	19
2019	2019-06-03	June	1Early	S	4	1	401S	7	30	19
2019	2019-06-03	June	1Early	S	4	1	401S	12	30	20
2019	2019-06-03	June	1Early	S	4	2	402S	4	28	20
2019	2019-06-03	June	1Early	S	4	2	402S	7	28	20
2019	2019-06-03	June	1Early	S	4	2	402S	12	28	16
2019	2019-06-03	June	1Early	S	4	3	403S	4	29	19
2019	2019-06-03	June	1Early	S	4	3	403S	7	28	5
2019	2019-06-03	June	1Early	S	4	3	403S	12	29	14
2019	2019-06-03	June	1Early	S	4	4	404S	4	59	19
2019	2019-06-03	June	1Early	S	4	4	404S	7	29	18
2019	2019-06-03	June	1Early	S	4	4	404S	12	30	19
2019	2019-06-03	June	1Early	S	4	5	405S	4	30	18
2019	2019-06-03	June	1Early	S	4	5	405S	7	29	20
2019	2019-06-03	June	1Early	S	4	5	405S	12	30	20
2019	2019-06-03	June	1Early	S	4	6	406S	4	28	17
2019	2019-06-03	June	1Early	S	4	6	406S	7	26	12
2019	2019-06-03	June	1Early	S	4	6	406S	12	27	18
2019	2019-06-03	June	1Early	S	5	1	501S	4	31	20
2019	2019-06-03	June	1Early	S	5	1	501S	7	30	17
2019	2019-06-03	June	1Early	S	5	1	501S	12	27	20
2019	2019-06-03	June	1Early	S	5	2	502S	4	30	19
2019	2019-06-03	June	1Early	S	5	2	502S	7	29	18
2019	2019-06-03	June	1Early	S	5	2	502S	12	30	20
2019	2019-06-03	June	1Early	S	5	3	503S	4	29	20
2019	2019-06-03	June	1Early	S	5	3	503S	7	30	17
2019	2019-06-03	June	1Early	S	5	3	503S	12	30	19
2019	2019-06-03	June	1Early	S	5	4	504S	4	29	19
2019	2019-06-03	June	1Early	S	5	4	504S	7	30	17
2019	2019-06-03	June	1Early	S	5	4	504S	12	29	19
2019	2019-06-03	June	1Early	S	5	5	505S	4	29	18
2019	2019-06-03	June	1Early	S	5	5	505S	7	31	19
2019	2019-06-03	June	1Early	S	5	5	505S	12	29	16
2019	2019-06-03	June	1Early	S	5	6	506S	4	30	19
2019	2019-06-03	June	1Early	S	5	6	506S	7	30	17
2019	2019-06-03	June	1Early	S	5	6	506S	12	29	19
2019	2019-06-03	June	1Early	S	6	1	601S	4	28	17
2019	2019-06-03	June	1Early	S	6	1	601S	7	30	19
2019	2019-06-03	June	1Early	S	6	1	601S	12	29	18
2019	2019-06-03	June	1Early	S	6	2	602S	4	28	18
2019	2019-06-03	June	1Early	S	6	2	602S	7	30	12
2019	2019-06-03	June	1Early	S	6	2	602S	12	28	20
2019	2019-06-03	June	1Early	S	6	3	603S	4	29	18
2019	2019-06-03	June	1Early	S	6	3	603S	7	28	15
2019	2019-06-03	June	1Early	S	6	3	603S	12	23	16
2019	2019-06-03	June	1Early	S	6	4	604S	4	28	19
2019	2019-06-03	June	1Early	S	6	4	604S	7	28	18
2019	2019-06-03	June	1Early	S	6	4	604S	12	27	16
2019	2019-06-03	June	1Early	S	6	5	605S	4	28	20
2019	2019-06-03	June	1Early	S	6	5	605S	7	27	16
2019	2019-06-03	June	1Early	S	6	5	605S	12	29	19
2019	2019-06-03	June	1Early	S	6	6	606S	4	30	20
2019	2019-06-03	June	1Early	S	6	6	606S	7	29	20
2019	2019-06-03	June	1Early	S	6	6	606S	12	29	19
2019	2019-06-12	June	1Early	N	1	1	101N	4	29	16
2019	2019-06-12	June	1Early	N	1	1	101N	7	30	10
2019	2019-06-12	June	1Early	N	1	1	101N	12	27	7
2019	2019-06-12	June	1Early	N	1	2	102N	4	30	16
2019	2019-06-12	June	1Early	N	1	2	102N	7	30	7
2019	2019-06-12	June	1Early	N	1	2	102N	12	30	17
2019	2019-06-12	June	1Early	N	1	3	103N	4	30	20
2019	2019-06-12	June	1Early	N	1	3	103N	7	26	7
2019	2019-06-12	June	1Early	N	1	3	103N	12	30	14
2019	2019-06-12	June	1Early	N	1	4	104N	4	30	11
2019	2019-06-12	June	1Early	N	1	4	104N	7	28	5
2019	2019-06-12	June	1Early	N	1	4	104N	12	27	5
2019	2019-06-12	June	1Early	N	1	5	105N	4	27	16
2019	2019-06-12	June	1Early	N	1	5	105N	7	27	17
2019	2019-06-12	June	1Early	N	1	5	105N	12	29	6
2019	2019-06-12	June	1Early	N	1	6	106N	4	26	18
2019	2019-06-12	June	1Early	N	1	6	106N	7	27	12
2019	2019-06-12	June	1Early	N	1	6	106N	12	27	14
2019	2019-06-12	June	1Early	N	2	1	201N	4	30	4
2019	2019-06-12	June	1Early	N	2	1	201N	7	28	11
2019	2019-06-12	June	1Early	N	2	1	201N	12	26	13
2019	2019-06-12	June	1Early	N	2	2	202N	4	30	10
2019	2019-06-12	June	1Early	N	2	2	202N	7	27	15
2019	2019-06-12	June	1Early	N	2	2	202N	12	30	0
2019	2019-06-12	June	1Early	N	2	3	203N	4	29	4
2019	2019-06-12	June	1Early	N	2	3	203N	7	28	18
2019	2019-06-12	June	1Early	N	2	3	203N	12	27	6
2019	2019-06-12	June	1Early	N	2	4	204N	4	27	20
2019	2019-06-12	June	1Early	N	2	4	204N	7	28	17
2019	2019-06-12	June	1Early	N	2	4	204N	12	30	11
2019	2019-06-12	June	1Early	N	2	5	205N	4	27	20
2019	2019-06-12	June	1Early	N	2	5	205N	7	29	20
2019	2019-06-12	June	1Early	N	2	5	205N	12	27	6
2019	2019-06-12	June	1Early	N	2	6	206N	4	22	15
2019	2019-06-12	June	1Early	N	2	6	206N	7	29	20
2019	2019-06-12	June	1Early	N	2	6	206N	12	23	18
2019	2019-06-12	June	1Early	N	3	1	301N	4	24	4
2019	2019-06-12	June	1Early	N	3	1	301N	7	29	19
2019	2019-06-12	June	1Early	N	3	1	301N	12	27	2
2019	2019-06-12	June	1Early	N	3	2	302N	4	28	5
2019	2019-06-12	June	1Early	N	3	2	302N	7	28	16
2019	2019-06-12	June	1Early	N	3	2	302N	12	29	19
2019	2019-06-12	June	1Early	N	3	3	303N	4	30	12
2019	2019-06-12	June	1Early	N	3	3	303N	7	29	5
2019	2019-06-12	June	1Early	N	3	3	303N	12	28	5
2019	2019-06-12	June	1Early	N	3	4	304N	4	29	12
2019	2019-06-12	June	1Early	N	3	4	304N	7	29	11
2019	2019-06-12	June	1Early	N	3	4	304N	12	27	20
2019	2019-06-12	June	1Early	N	3	5	305N	4	30	2
2019	2019-06-12	June	1Early	N	3	5	305N	7	30	6
2019	2019-06-12	June	1Early	N	3	5	305N	12	28	17
2019	2019-06-12	June	1Early	N	3	6	306N	4	27	10
2019	2019-06-12	June	1Early	N	3	6	306N	7	26	7
2019	2019-06-12	June	1Early	N	3	6	306N	12	26	10
2019	2019-06-12	June	1Early	N	4	1	401N	4	27	12
2019	2019-06-12	June	1Early	N	4	1	401N	7	28	15
2019	2019-06-12	June	1Early	N	4	1	401N	12	26	14
2019	2019-06-12	June	1Early	N	4	2	402N	4	27	16
2019	2019-06-12	June	1Early	N	4	2	402N	7	28	17
2019	2019-06-12	June	1Early	N	4	2	402N	12	30	20
2019	2019-06-12	June	1Early	N	4	3	403N	4	26	15
2019	2019-06-12	June	1Early	N	4	3	403N	7	30	17
2019	2019-06-12	June	1Early	N	4	3	403N	12	27	14
2019	2019-06-12	June	1Early	N	4	4	404N	4	29	16
2019	2019-06-12	June	1Early	N	4	4	404N	7	28	16
2019	2019-06-12	June	1Early	N	4	4	404N	12	26	17
2019	2019-06-12	June	1Early	N	4	5	405N	4	30	15
2019	2019-06-12	June	1Early	N	4	5	405N	7	30	16
2019	2019-06-12	June	1Early	N	4	5	405N	12	28	16
2019	2019-06-12	June	1Early	N	4	6	406N	4	30	20
2019	2019-06-12	June	1Early	N	4	6	406N	7	30	18
2019	2019-06-12	June	1Early	N	4	6	406N	12	30	19
2019	2019-06-12	June	1Early	N	5	1	501N	4	29	15
2019	2019-06-12	June	1Early	N	5	1	501N	7	23	16
2019	2019-06-12	June	1Early	N	5	1	501N	12	27	16
2019	2019-06-12	June	1Early	N	5	2	502N	4	28	17
2019	2019-06-12	June	1Early	N	5	2	502N	7	27	15
2019	2019-06-12	June	1Early	N	5	2	502N	12	28	1
2019	2019-06-12	June	1Early	N	5	3	503N	4	25	12
2019	2019-06-12	June	1Early	N	5	3	503N	7	30	8
2019	2019-06-12	June	1Early	N	5	3	503N	12	28	20
2019	2019-06-12	June	1Early	N	5	4	504N	4	29	7
2019	2019-06-12	June	1Early	N	5	4	504N	7	25	20
2019	2019-06-12	June	1Early	N	5	4	504N	12	29	13
2019	2019-06-12	June	1Early	N	5	5	505N	4	30	20
2019	2019-06-12	June	1Early	N	5	5	505N	7	30	18
2019	2019-06-12	June	1Early	N	5	5	505N	12	30	20
2019	2019-06-12	June	1Early	N	5	6	506N	4	29	19
2019	2019-06-12	June	1Early	N	5	6	506N	7	30	18
2019	2019-06-12	June	1Early	N	5	6	506N	12	28	19
2019	2019-06-12	June	1Early	N	6	1	601N	4	30	20
2019	2019-06-12	June	1Early	N	6	1	601N	7	29	18
2019	2019-06-12	June	1Early	N	6	1	601N	12	30	3
2019	2019-06-12	June	1Early	N	6	2	602N	4	30	20
2019	2019-06-12	June	1Early	N	6	2	602N	7	29	18
2019	2019-06-12	June	1Early	N	6	2	602N	12	30	3
2019	2019-06-12	June	1Early	N	6	3	603N	4	17	12
2019	2019-06-12	June	1Early	N	6	3	603N	7	29	14
2019	2019-06-12	June	1Early	N	6	3	603N	12	29	17
2019	2019-06-12	June	1Early	N	6	4	604N	4	30	18
2019	2019-06-12	June	1Early	N	6	4	604N	7	30	20
2019	2019-06-12	June	1Early	N	6	4	604N	12	28	16
2019	2019-06-12	June	1Early	N	6	5	605N	4	28	20
2019	2019-06-12	June	1Early	N	6	5	605N	7	27	17
2019	2019-06-12	June	1Early	N	6	5	605N	12	30	16
2019	2019-06-12	June	1Early	N	6	6	606N	4	26	18
2019	2019-06-12	June	1Early	N	6	6	606N	7	27	17
2019	2019-06-12	June	1Early	N	6	6	606N	12	30	20
2017	2017-09-09	September	3Late	S	1	1	101S	4	25	3
2017	2017-09-09	September	3Late	S	1	1	101S	7	31	16
2017	2017-09-09	September	3Late	S	1	1	101S	12	28	6
2017	2017-09-09	September	3Late	S	1	2	102S	4	18	14
2017	2017-09-09	September	3Late	S	1	2	102S	7	3	0
2017	2017-09-09	September	3Late	S	1	2	102S	12	28	2
2017	2017-09-09	September	3Late	S	1	3	103S	4	28	10
2017	2017-09-09	September	3Late	S	1	3	103S	7	29	16
2017	2017-09-09	September	3Late	S	1	3	103S	12	30	18
2017	2017-09-09	September	3Late	S	1	4	104S	4	30	18
2017	2017-09-09	September	3Late	S	1	4	104S	7	2	1
2017	2017-09-09	September	3Late	S	1	4	104S	12	0	0
2017	2017-09-09	September	3Late	S	1	5	105S	4	20	8
2017	2017-09-09	September	3Late	S	1	5	105S	7	29	17
2017	2017-09-09	September	3Late	S	1	5	105S	12	4	1
2017	2017-09-09	September	3Late	S	1	6	106S	4	0	0
2017	2017-09-09	September	3Late	S	1	6	106S	7	9	0
2017	2017-09-09	September	3Late	S	1	6	106S	12	11	0
2017	2017-09-09	September	3Late	S	2	1	201S	4	4	0
2017	2017-09-09	September	3Late	S	2	1	201S	7	2	4
2017	2017-09-09	September	3Late	S	2	1	201S	12	1	0
2017	2017-09-09	September	3Late	S	2	2	202S	4	1	0
2017	2017-09-09	September	3Late	S	2	2	202S	7	30	20
2017	2017-09-09	September	3Late	S	2	2	202S	12	3	4
2017	2017-09-09	September	3Late	S	2	3	203S	4	24	8
2017	2017-09-09	September	3Late	S	2	3	203S	7	31	18
2017	2017-09-09	September	3Late	S	2	3	203S	12	1	2
2017	2017-09-09	September	3Late	S	2	4	204S	4	29	20
2017	2017-09-09	September	3Late	S	2	4	204S	7	3	0
2017	2017-09-09	September	3Late	S	2	4	204S	12	0	3
2017	2017-09-09	September	3Late	S	2	5	205S	4	6	1
2017	2017-09-09	September	3Late	S	2	5	205S	7	14	3
2017	2017-09-09	September	3Late	S	2	5	205S	12	31	17
2017	2017-09-09	September	3Late	S	2	6	206S	4	0	0
2017	2017-09-09	September	3Late	S	2	6	206S	7	3	1
2017	2017-09-09	September	3Late	S	2	6	206S	12	0	0
2017	2017-09-09	September	3Late	S	3	1	301S	4	29	0
2017	2017-09-09	September	3Late	S	3	1	301S	7	0	0
2017	2017-09-09	September	3Late	S	3	1	301S	12	16	4
2017	2017-09-09	September	3Late	S	3	2	302S	4	7	3
2017	2017-09-09	September	3Late	S	3	2	302S	7	0	0
2017	2017-09-09	September	3Late	S	3	2	302S	12	30	18
2017	2017-09-09	September	3Late	S	3	3	303S	4	32	20
2017	2017-09-09	September	3Late	S	3	3	303S	7	24	6
2017	2017-09-09	September	3Late	S	3	3	303S	12	27	21
2017	2017-09-09	September	3Late	S	3	4	304S	4	29	20
2017	2017-09-09	September	3Late	S	3	4	304S	7	16	0
2017	2017-09-09	September	3Late	S	3	4	304S	12	0	0
2017	2017-09-09	September	3Late	S	3	5	305S	4	0	0
2017	2017-09-09	September	3Late	S	3	5	305S	7	2	0
2017	2017-09-09	September	3Late	S	3	5	305S	12	3	0
2017	2017-09-09	September	3Late	S	3	6	306S	4	3	0
2017	2017-09-09	September	3Late	S	3	6	306S	7	0	0
2017	2017-09-09	September	3Late	S	3	6	306S	12	2	0
2017	2017-09-09	September	3Late	S	4	1	401S	4	28	17
2017	2017-09-09	September	3Late	S	4	1	401S	7	28	12
2017	2017-09-09	September	3Late	S	4	1	401S	12	30	14
2017	2017-09-09	September	3Late	S	4	2	402S	4	0	0
2017	2017-09-09	September	3Late	S	4	2	402S	7	31	21
2017	2017-09-09	September	3Late	S	4	2	402S	12	15	7
2017	2017-09-09	September	3Late	S	4	3	403S	4	29	18
2017	2017-09-09	September	3Late	S	4	3	403S	7	10	7
2017	2017-09-09	September	3Late	S	4	3	403S	12	28	16
2017	2017-09-09	September	3Late	S	4	4	404S	4	30	0
2017	2017-09-09	September	3Late	S	4	4	404S	7	0	0
2017	2017-09-09	September	3Late	S	4	4	404S	12	12	1
2017	2017-09-09	September	3Late	S	4	5	405S	4	26	17
2017	2017-09-09	September	3Late	S	4	5	405S	7	29	14
2017	2017-09-09	September	3Late	S	4	5	405S	12	26	21
2017	2017-09-09	September	3Late	S	4	6	406S	4	26	18
2017	2017-09-09	September	3Late	S	4	6	406S	7	0	0
2017	2017-09-09	September	3Late	S	4	6	406S	12	0	0
2017	2017-09-09	September	3Late	S	5	1	501S	4	23	11
2017	2017-09-09	September	3Late	S	5	1	501S	7	30	19
2017	2017-09-09	September	3Late	S	5	1	501S	12	27	15
2017	2017-09-09	September	3Late	S	5	2	502S	4	2	0
2017	2017-09-09	September	3Late	S	5	2	502S	7	28	9
2017	2017-09-09	September	3Late	S	5	2	502S	12	12	9
2017	2017-09-09	September	3Late	S	5	3	503S	4	27	20
2017	2017-09-09	September	3Late	S	5	3	503S	7	1	0
2017	2017-09-09	September	3Late	S	5	3	503S	12	26	19
2017	2017-09-09	September	3Late	S	5	4	504S	4	18	7
2017	2017-09-09	September	3Late	S	5	4	504S	7	6	1
2017	2017-09-09	September	3Late	S	5	4	504S	12	31	18
2017	2017-09-09	September	3Late	S	5	5	505S	4	2	0
2017	2017-09-09	September	3Late	S	5	5	505S	7	16	9
2017	2017-09-09	September	3Late	S	5	5	505S	12	24	14
2017	2017-09-09	September	3Late	S	5	6	506S	4	21	4
2017	2017-09-09	September	3Late	S	5	6	506S	7	0	0
2017	2017-09-09	September	3Late	S	5	6	506S	12	4	0
2017	2017-09-09	September	3Late	S	6	1	601S	4	4	0
2017	2017-09-09	September	3Late	S	6	1	601S	7	27	11
2017	2017-09-09	September	3Late	S	6	1	601S	12	29	13
2017	2017-09-09	September	3Late	S	6	2	602S	4	25	14
2017	2017-09-09	September	3Late	S	6	2	602S	7	0	0
2017	2017-09-09	September	3Late	S	6	2	602S	12	21	15
2017	2017-09-09	September	3Late	S	6	3	603S	4	30	6
2017	2017-09-09	September	3Late	S	6	3	603S	7	2	3
2017	2017-09-09	September	3Late	S	6	3	603S	12	23	2
2017	2017-09-09	September	3Late	S	6	4	604S	4	29	12
2017	2017-09-09	September	3Late	S	6	4	604S	7	21	5
2017	2017-09-09	September	3Late	S	6	4	604S	12	5	1
2017	2017-09-09	September	3Late	S	6	5	605S	4	30	8
2017	2017-09-09	September	3Late	S	6	5	605S	7	20	4
2017	2017-09-09	September	3Late	S	6	5	605S	12	23	9
2017	2017-09-09	September	3Late	S	6	6	606S	4	26	4
2017	2017-09-09	September	3Late	S	6	6	606S	7	14	0
2017	2017-09-09	September	3Late	S	6	6	606S	12	10	1
2017	2017-09-28	September	3Late	N	1	1	101N	4	27	20
2017	2017-09-28	September	3Late	N	1	1	101N	7	27	20
2017	2017-09-28	September	3Late	N	1	1	101N	12	29	20
2017	2017-09-28	September	3Late	N	1	2	102N	4	30	20
2017	2017-09-28	September	3Late	N	1	2	102N	7	31	18
2017	2017-09-28	September	3Late	N	1	2	102N	12	30	19
2017	2017-09-28	September	3Late	N	1	3	103N	4	31	19
2017	2017-09-28	September	3Late	N	1	3	103N	7	30	20
2017	2017-09-28	September	3Late	N	1	3	103N	12	26	20
2017	2017-09-28	September	3Late	N	1	4	104N	4	32	20
2017	2017-09-28	September	3Late	N	1	4	104N	7	30	18
2017	2017-09-28	September	3Late	N	1	4	104N	12	30	20
2017	2017-09-28	September	3Late	N	1	5	105N	4	30	19
2017	2017-09-28	September	3Late	N	1	5	105N	7	30	18
2017	2017-09-28	September	3Late	N	1	5	105N	12	30	20
2017	2017-09-28	September	3Late	N	1	6	106N	4	28	18
2017	2017-09-28	September	3Late	N	1	6	106N	7	28	20
2017	2017-09-28	September	3Late	N	1	6	106N	12	29	19
2017	2017-09-28	September	3Late	N	2	1	201N	4	29	20
2017	2017-09-28	September	3Late	N	2	1	201N	7	29	19
2017	2017-09-28	September	3Late	N	2	1	201N	12	29	19
2017	2017-09-28	September	3Late	N	2	2	202N	4	30	18
2017	2017-09-28	September	3Late	N	2	2	202N	7	30	19
2017	2017-09-28	September	3Late	N	2	2	202N	12	30	20
2017	2017-09-28	September	3Late	N	2	3	203N	4	25	19
2017	2017-09-28	September	3Late	N	2	3	203N	7	30	12
2017	2017-09-28	September	3Late	N	2	3	203N	12	26	18
2017	2017-09-28	September	3Late	N	2	4	204N	4	31	21
2017	2017-09-28	September	3Late	N	2	4	204N	7	30	19
2017	2017-09-28	September	3Late	N	2	4	204N	12	30	18
2017	2017-09-28	September	3Late	N	2	5	205N	4	30	20
2017	2017-09-28	September	3Late	N	2	5	205N	7	30	20
2017	2017-09-28	September	3Late	N	2	5	205N	12	30	18
2017	2017-09-28	September	3Late	N	2	6	206N	4	30	17
2017	2017-09-28	September	3Late	N	2	6	206N	7	27	15
2017	2017-09-28	September	3Late	N	2	6	206N	12	30	14
2017	2017-09-28	September	3Late	N	3	1	301N	4	33	20
2017	2017-09-28	September	3Late	N	3	1	301N	7	32	20
2017	2017-09-28	September	3Late	N	3	1	301N	12	31	19
2017	2017-09-28	September	3Late	N	3	2	302N	4	27	19
2017	2017-09-28	September	3Late	N	3	2	302N	7	31	18
2017	2017-09-28	September	3Late	N	3	2	302N	12	28	18
2017	2017-09-28	September	3Late	N	3	3	303N	4	30	20
2017	2017-09-28	September	3Late	N	3	3	303N	7	13	21
2017	2017-09-28	September	3Late	N	3	3	303N	12	28	20
2017	2017-09-28	September	3Late	N	3	4	304N	4
2017	2017-09-28	September	3Late	N	3	4	304N	7
2017	2017-09-28	September	3Late	N	3	4	304N	12
2017	2017-09-28	September	3Late	N	3	5	305N	4	29	19
2017	2017-09-28	September	3Late	N	3	5	305N	7	29	20
2017	2017-09-28	September	3Late	N	3	5	305N	12	25	20
2017	2017-09-28	September	3Late	N	3	6	306N	4	27	14
2017	2017-09-28	September	3Late	N	3	6	306N	7	25	20
2017	2017-09-28	September	3Late	N	3	6	306N	12	31	18
2017	2017-09-28	September	3Late	N	4	1	401N	4	31	21
2017	2017-09-28	September	3Late	N	4	1	401N	7	20	13
2017	2017-09-28	September	3Late	N	4	1	401N	12	26	9
2017	2017-09-28	September	3Late	N	4	2	402N	4	30	20
2017	2017-09-28	September	3Late	N	4	2	402N	7	29	18
2017	2017-09-28	September	3Late	N	4	2	402N	12	29	18
2017	2017-09-28	September	3Late	N	4	3	403N	4	29	19
2017	2017-09-28	September	3Late	N	4	3	403N	7	30	19
2017	2017-09-28	September	3Late	N	4	3	403N	12	30	19
2017	2017-09-28	September	3Late	N	4	4	404N	4	28	15
2017	2017-09-28	September	3Late	N	4	4	404N	7	30	20
2017	2017-09-28	September	3Late	N	4	4	404N	12	25	12
2017	2017-09-28	September	3Late	N	4	5	405N	4	31	21
2017	2017-09-28	September	3Late	N	4	5	405N	7	29	19
2017	2017-09-28	September	3Late	N	4	5	405N	12	27	12
2017	2017-09-28	September	3Late	N	4	6	406N	4	29	19
2017	2017-09-28	September	3Late	N	4	6	406N	7	24	17
2017	2017-09-28	September	3Late	N	4	6	406N	12	27	15
2017	2017-09-28	September	3Late	N	5	1	501N	4	31	18
2017	2017-09-28	September	3Late	N	5	1	501N	7	31	17
2017	2017-09-28	September	3Late	N	5	1	501N	12	30	14
2017	2017-09-28	September	3Late	N	5	2	502N	4	31	18
2017	2017-09-28	September	3Late	N	5	2	502N	7	31	20
2017	2017-09-28	September	3Late	N	5	2	502N	12	31	19
2017	2017-09-28	September	3Late	N	5	3	503N	4	31	14
2017	2017-09-28	September	3Late	N	5	3	503N	7	29	20
2017	2017-09-28	September	3Late	N	5	3	503N	12	31	19
2017	2017-09-28	September	3Late	N	5	4	504N	4	29	20
2017	2017-09-28	September	3Late	N	5	4	504N	7	29	20
2017	2017-09-28	September	3Late	N	5	4	504N	12	31	19
2017	2017-09-28	September	3Late	N	5	5	505N	4	30	18
2017	2017-09-28	September	3Late	N	5	5	505N	7	31	21
2017	2017-09-28	September	3Late	N	5	5	505N	12	29	16
2017	2017-09-28	September	3Late	N	5	6	506N	4	29	20
2017	2017-09-28	September	3Late	N	5	6	506N	7	29	21
2017	2017-09-28	September	3Late	N	5	6	506N	12	30	21
2017	2017-09-28	September	3Late	N	6	1	601N	4	30	19
2017	2017-09-28	September	3Late	N	6	1	601N	7	31	17
2017	2017-09-28	September	3Late	N	6	1	601N	12	28	17
2017	2017-09-28	September	3Late	N	6	2	602N	4	30	20
2017	2017-09-28	September	3Late	N	6	2	602N	7	29	17
2017	2017-09-28	September	3Late	N	6	2	602N	12	28	20
2017	2017-09-28	September	3Late	N	6	3	603N	4	31	19
2017	2017-09-28	September	3Late	N	6	3	603N	7	29	17
2017	2017-09-28	September	3Late	N	6	3	603N	12	29	20
2017	2017-09-28	September	3Late	N	6	4	604N	4	29	18
2017	2017-09-28	September	3Late	N	6	4	604N	7	30	19
2017	2017-09-28	September	3Late	N	6	4	604N	12	27	22
2017	2017-09-28	September	3Late	N	6	5	605N	4	29	20
2017	2017-09-28	September	3Late	N	6	5	605N	7	30	20
2017	2017-09-28	September	3Late	N	6	5	605N	12	28	19
2017	2017-09-28	September	3Late	N	6	6	606N	4	29	12
2017	2017-09-28	September	3Late	N	6	6	606N	7	29	20
2017	2017-09-28	September	3Late	N	6	6	606N	12	31	19
2018	2018-08-15	August/September	3Late	N	1	1	101N	4	1	0
2018	2018-08-15	August/September	3Late	N	1	1	101N	7	29	3
2018	2018-08-15	August/September	3Late	N	1	1	101N	12	0	0
2018	2018-08-15	August/September	3Late	N	1	2	102N	4	1	1
2018	2018-08-15	August/September	3Late	N	1	2	102N	7	0	0
2018	2018-08-15	August/September	3Late	N	1	2	102N	12	17	3
2018	2018-08-15	August/September	3Late	N	1	3	103N	4	3	9
2018	2018-08-15	August/September	3Late	N	1	3	103N	7	0	2
2018	2018-08-15	August/September	3Late	N	1	3	103N	12	0	0
2018	2018-08-15	August/September	3Late	N	1	4	104N	4	6	1
2018	2018-08-15	August/September	3Late	N	1	4	104N	7	5	0
2018	2018-08-15	August/September	3Late	N	1	4	104N	12	7	0
2018	2018-08-15	August/September	3Late	N	1	5	105N	4	0	0
2018	2018-08-15	August/September	3Late	N	1	5	105N	7	1	0
2018	2018-08-15	August/September	3Late	N	1	5	105N	12	6	1
2018	2018-08-15	August/September	3Late	N	1	6	106N	4	8	6
2018	2018-08-15	August/September	3Late	N	1	6	106N	7	24	4
2018	2018-08-15	August/September	3Late	N	1	6	106N	12	17	1
2018	2018-08-15	August/September	3Late	N	2	1	201N	4	1	0
2018	2018-08-15	August/September	3Late	N	2	1	201N	7	18	3
2018	2018-08-15	August/September	3Late	N	2	1	201N	12	28	5
2018	2018-08-15	August/September	3Late	N	2	2	202N	4	19	4
2018	2018-08-15	August/September	3Late	N	2	2	202N	7	27	10
2018	2018-08-15	August/September	3Late	N	2	2	202N	12	0	0
2018	2018-08-15	August/September	3Late	N	2	3	203N	4	1	0
2018	2018-08-15	August/September	3Late	N	2	3	203N	7	0	1
2018	2018-08-15	August/September	3Late	N	2	3	203N	12	2	4
2018	2018-08-15	August/September	3Late	N	2	4	204N	4	2	1
2018	2018-08-15	August/September	3Late	N	2	4	204N	7	0	0
2018	2018-08-15	August/September	3Late	N	2	4	204N	12	0	0
2018	2018-08-15	August/September	3Late	N	2	5	205N	4	0	0
2018	2018-08-15	August/September	3Late	N	2	5	205N	7	6	0
2018	2018-08-15	August/September	3Late	N	2	5	205N	12	27	6
2018	2018-08-15	August/September	3Late	N	2	6	206N	4	0	0
2018	2018-08-15	August/September	3Late	N	2	6	206N	7	2	0
2018	2018-08-15	August/September	3Late	N	2	6	206N	12	7	2
2018	2018-08-15	August/September	3Late	N	3	1	301N	4	30	20
2018	2018-08-15	August/September	3Late	N	3	1	301N	7	19	6
2018	2018-08-15	August/September	3Late	N	3	1	301N	12	0	0
2018	2018-08-15	August/September	3Late	N	3	2	302N	4	17	16
2018	2018-08-15	August/September	3Late	N	3	2	302N	7	22	2
2018	2018-08-15	August/September	3Late	N	3	2	302N	12	2	1
2018	2018-08-15	August/September	3Late	N	3	3	303N	4	1	0
2018	2018-08-15	August/September	3Late	N	3	3	303N	7	4	0
2018	2018-08-15	August/September	3Late	N	3	3	303N	12	1	2
2018	2018-08-15	August/September	3Late	N	3	4	304N	4	1	3
2018	2018-08-15	August/September	3Late	N	3	4	304N	7	20	6
2018	2018-08-15	August/September	3Late	N	3	4	304N	12	0	1
2018	2018-08-15	August/September	3Late	N	3	5	305N	4	20	1
2018	2018-08-15	August/September	3Late	N	3	5	305N	7	15	1
2018	2018-08-15	August/September	3Late	N	3	5	305N	12	1	1
2018	2018-08-15	August/September	3Late	N	3	6	306N	4	24	0
2018	2018-08-15	August/September	3Late	N	3	6	306N	7	4	1
2018	2018-08-15	August/September	3Late	N	3	6	306N	12	2	2
2018	2018-08-15	August/September	3Late	N	4	1	401N	4	27	12
2018	2018-08-15	August/September	3Late	N	4	1	401N	7	5	0
2018	2018-08-15	August/September	3Late	N	4	1	401N	12	2	0
2018	2018-08-15	August/September	3Late	N	4	2	402N	4	29	5
2018	2018-08-15	August/September	3Late	N	4	2	402N	7	3	0
2018	2018-08-15	August/September	3Late	N	4	2	402N	12	26	20
2018	2018-08-15	August/September	3Late	N	4	3	403N	4	30	17
2018	2018-08-15	August/September	3Late	N	4	3	403N	7	1	2
2018	2018-08-15	August/September	3Late	N	4	3	403N	12	30	15
2018	2018-08-15	August/September	3Late	N	4	4	404N	4	18	0
2018	2018-08-15	August/September	3Late	N	4	4	404N	7	4	3
2018	2018-08-15	August/September	3Late	N	4	4	404N	12	30	15
2018	2018-08-15	August/September	3Late	N	4	5	405N	4	18	0
2018	2018-08-15	August/September	3Late	N	4	5	405N	7	4	3
2018	2018-08-15	August/September	3Late	N	4	5	405N	12	4	2
2018	2018-08-15	August/September	3Late	N	4	6	406N	4	13	0
2018	2018-08-15	August/September	3Late	N	4	6	406N	7	9	0
2018	2018-08-15	August/September	3Late	N	4	6	406N	12	15	5
2018	2018-08-15	August/September	3Late	N	5	1	501N	4	23	15
2018	2018-08-15	August/September	3Late	N	5	1	501N	7	19	9
2018	2018-08-15	August/September	3Late	N	5	1	501N	12	0	0
2018	2018-08-15	August/September	3Late	N	5	2	502N	4	9	0
2018	2018-08-15	August/September	3Late	N	5	2	502N	7	27	8
2018	2018-08-15	August/September	3Late	N	5	2	502N	12	4	0
2018	2018-08-15	August/September	3Late	N	5	3	503N	4	25	10
2018	2018-08-15	August/September	3Late	N	5	3	503N	7	1	1
2018	2018-08-15	August/September	3Late	N	5	3	503N	12	30	1
2018	2018-08-15	August/September	3Late	N	5	4	504N	4	1	0
2018	2018-08-15	August/September	3Late	N	5	4	504N	7	20	2
2018	2018-08-15	August/September	3Late	N	5	4	504N	12	27	5
2018	2018-08-15	August/September	3Late	N	5	5	505N	4	16	2
2018	2018-08-15	August/September	3Late	N	5	5	505N	7
2018	2018-08-15	August/September	3Late	N	5	5	505N	12	24	2
2018	2018-08-15	August/September	3Late	N	5	6	506N	4	30	17
2018	2018-08-15	August/September	3Late	N	5	6	506N	7	23	4
2018	2018-08-15	August/September	3Late	N	5	6	506N	12	25	20
2018	2018-08-15	August/September	3Late	N	6	1	601N	4	2	0
2018	2018-08-15	August/September	3Late	N	6	1	601N	7	3	2
2018	2018-08-15	August/September	3Late	N	6	1	601N	12	0	1
2018	2018-08-15	August/September	3Late	N	6	2	602N	4	3	1
2018	2018-08-15	August/September	3Late	N	6	2	602N	7	2	0
2018	2018-08-15	August/September	3Late	N	6	2	602N	12	0	0
2018	2018-08-15	August/September	3Late	N	6	3	603N	4	4	0
2018	2018-08-15	August/September	3Late	N	6	3	603N	7	0	0
2018	2018-08-15	August/September	3Late	N	6	3	603N	12	28	17
2018	2018-08-15	August/September	3Late	N	6	4	604N	4	29	14
2018	2018-08-15	August/September	3Late	N	6	4	604N	7	1	0
2018	2018-08-15	August/September	3Late	N	6	4	604N	12	2	1
2018	2018-08-15	August/September	3Late	N	6	5	605N	4	30	2
2018	2018-08-15	August/September	3Late	N	6	5	605N	7	26	3
2018	2018-08-15	August/September	3Late	N	6	5	605N	12	1	0
2018	2018-08-15	August/September	3Late	N	6	6	606N	4	3	2
2018	2018-08-15	August/September	3Late	N	6	6	606N	7	22	12
2018	2018-08-15	August/September	3Late	N	6	6	606N	12	20	7
2018	2018-09-05	August/September	3Late	S	1	1	101S	4	0	0
2018	2018-09-05	August/September	3Late	S	1	1	101S	7	26	15
2018	2018-09-05	August/September	3Late	S	1	1	101S	12	6	3
2018	2018-09-05	August/September	3Late	S	1	2	102S	4	1	0
2018	2018-09-05	August/September	3Late	S	1	2	102S	7	0	0
2018	2018-09-05	August/September	3Late	S	1	2	102S	12	0	0
2018	2018-09-05	August/September	3Late	S	1	3	103S	4	29	14
2018	2018-09-05	August/September	3Late	S	1	3	103S	7	0	4
2018	2018-09-05	August/September	3Late	S	1	3	103S	12	0	0
2018	2018-09-05	August/September	3Late	S	1	4	104S	4	0	0
2018	2018-09-05	August/September	3Late	S	1	4	104S	7	0	0
2018	2018-09-05	August/September	3Late	S	1	4	104S	12	0	0
2018	2018-09-05	August/September	3Late	S	1	5	105S	4	0	0
2018	2018-09-05	August/September	3Late	S	1	5	105S	7	0	0
2018	2018-09-05	August/September	3Late	S	1	5	105S	12	0	0
2018	2018-09-05	August/September	3Late	S	1	6	106S	4	0	1
2018	2018-09-05	August/September	3Late	S	1	6	106S	7	0	0
2018	2018-09-05	August/September	3Late	S	1	6	106S	12	0	0
2018	2018-09-05	August/September	3Late	S	2	1	201S	4	20	7
2018	2018-09-05	August/September	3Late	S	2	1	201S	7	0	0
2018	2018-09-05	August/September	3Late	S	2	1	201S	12	0	1
2018	2018-09-05	August/September	3Late	S	2	2	202S	4	0	0
2018	2018-09-05	August/September	3Late	S	2	2	202S	7	0	0
2018	2018-09-05	August/September	3Late	S	2	2	202S	12	0	0
2018	2018-09-05	August/September	3Late	S	2	3	203S	4	0	2
2018	2018-09-05	August/September	3Late	S	2	3	203S	7	0	0
2018	2018-09-05	August/September	3Late	S	2	3	203S	12	0	0
2018	2018-09-05	August/September	3Late	S	2	4	204S	4	0	0
2018	2018-09-05	August/September	3Late	S	2	4	204S	7	0	0
2018	2018-09-05	August/September	3Late	S	2	4	204S	12	0	17
2018	2018-09-05	August/September	3Late	S	2	5	205S	4	0	0
2018	2018-09-05	August/September	3Late	S	2	5	205S	7	0	20
2018	2018-09-05	August/September	3Late	S	2	5	205S	12	0	0
2018	2018-09-05	August/September	3Late	S	2	6	206S	4	0	0
2018	2018-09-05	August/September	3Late	S	2	6	206S	7	0	0
2018	2018-09-05	August/September	3Late	S	2	6	206S	12	0	0
2018	2018-09-05	August/September	3Late	S	3	1	301S	4	0	1
2018	2018-09-05	August/September	3Late	S	3	1	301S	7	1	0
2018	2018-09-05	August/September	3Late	S	3	1	301S	12	0	0
2018	2018-09-05	August/September	3Late	S	3	2	302S	4	2	4
2018	2018-09-05	August/September	3Late	S	3	2	302S	7	18	16
2018	2018-09-05	August/September	3Late	S	3	2	302S	12	17	19
2018	2018-09-05	August/September	3Late	S	3	3	303S	4	0	9
2018	2018-09-05	August/September	3Late	S	3	3	303S	7	0	0
2018	2018-09-05	August/September	3Late	S	3	3	303S	12	13	16
2018	2018-09-05	August/September	3Late	S	3	4	304S	4	4	2
2018	2018-09-05	August/September	3Late	S	3	4	304S	7	0	0
2018	2018-09-05	August/September	3Late	S	3	4	304S	12	0	0
2018	2018-09-05	August/September	3Late	S	3	5	305S	4	28	20
2018	2018-09-05	August/September	3Late	S	3	5	305S	7	2	0
2018	2018-09-05	August/September	3Late	S	3	5	305S	12	0	0
2018	2018-09-05	August/September	3Late	S	3	6	306S	4	2	0
2018	2018-09-05	August/September	3Late	S	3	6	306S	7	0	11
2018	2018-09-05	August/September	3Late	S	3	6	306S	12	3	0
2018	2018-09-05	August/September	3Late	S	4	1	401S	4	0	0
2018	2018-09-05	August/September	3Late	S	4	1	401S	7	0	0
2018	2018-09-05	August/September	3Late	S	4	1	401S	12	0	8
2018	2018-09-05	August/September	3Late	S	4	2	402S	4	0	0
2018	2018-09-05	August/September	3Late	S	4	2	402S	7	5	13
2018	2018-09-05	August/September	3Late	S	4	2	402S	12
2018	2018-09-05	August/September	3Late	S	4	3	403S	4	0	0
2018	2018-09-05	August/September	3Late	S	4	3	403S	7	30	19
2018	2018-09-05	August/September	3Late	S	4	3	403S	12	25	16
2018	2018-09-05	August/September	3Late	S	4	4	404S	4	29	16
2018	2018-09-05	August/September	3Late	S	4	4	404S	7	0	0
2018	2018-09-05	August/September	3Late	S	4	4	404S	12	0	1
2018	2018-09-05	August/September	3Late	S	4	5	405S	4	0	0
2018	2018-09-05	August/September	3Late	S	4	5	405S	7	0	4
2018	2018-09-05	August/September	3Late	S	4	5	405S	12	5	3
2018	2018-09-05	August/September	3Late	S	4	6	406S	4	26	17
2018	2018-09-05	August/September	3Late	S	4	6	406S	7	29	14
2018	2018-09-05	August/September	3Late	S	4	6	406S	12	17	18
2018	2018-09-05	August/September	3Late	S	5	1	501S	4	28	24
2018	2018-09-05	August/September	3Late	S	5	1	501S	7	28	15
2018	2018-09-05	August/September	3Late	S	5	1	501S	12	0	7
2018	2018-09-05	August/September	3Late	S	5	2	502S	4	30	20
2018	2018-09-05	August/September	3Late	S	5	2	502S	7	0	0
2018	2018-09-05	August/September	3Late	S	5	2	502S	12	0	7
2018	2018-09-05	August/September	3Late	S	5	3	503S	4	0	0
2018	2018-09-05	August/September	3Late	S	5	3	503S	7	1	0
2018	2018-09-05	August/September	3Late	S	5	3	503S	12	0	3
2018	2018-09-05	August/September	3Late	S	5	4	504S	4	32	18
2018	2018-09-05	August/September	3Late	S	5	4	504S	7	1	4
2018	2018-09-05	August/September	3Late	S	5	4	504S	12	9	21
2018	2018-09-05	August/September	3Late	S	5	5	505S	4	30	18
2018	2018-09-05	August/September	3Late	S	5	5	505S	7	19	19
2018	2018-09-05	August/September	3Late	S	5	5	505S	12	0	0
2018	2018-09-05	August/September	3Late	S	5	6	506S	4	1	10
2018	2018-09-05	August/September	3Late	S	5	6	506S	7	30	20
2018	2018-09-05	August/September	3Late	S	5	6	506S	12	3	9
2018	2018-09-05	August/September	3Late	S	6	1	601S	4	0	0
2018	2018-09-05	August/September	3Late	S	6	1	601S	7	1	16
2018	2018-09-05	August/September	3Late	S	6	1	601S	12	0	5
2018	2018-09-05	August/September	3Late	S	6	2	602S	4	44	18
2018	2018-09-05	August/September	3Late	S	6	2	602S	7	29	20
2018	2018-09-05	August/September	3Late	S	6	2	602S	12	0	0
2018	2018-09-05	August/September	3Late	S	6	3	603S	4	0	1
2018	2018-09-05	August/September	3Late	S	6	3	603S	7	2	1
2018	2018-09-05	August/September	3Late	S	6	3	603S	12	31	18
2018	2018-09-05	August/September	3Late	S	6	4	604S	4	0	2
2018	2018-09-05	August/September	3Late	S	6	4	604S	7	1	1
2018	2018-09-05	August/September	3Late	S	6	4	604S	12	0	14
2018	2018-09-05	August/September	3Late	S	6	5	605S	4	0	4
2018	2018-09-05	August/September	3Late	S	6	5	605S	7	30	19
2018	2018-09-05	August/September	3Late	S	6	5	605S	12	12	4
2018	2018-09-05	August/September	3Late	S	6	6	606S	4	0	6
2018	2018-09-05	August/September	3Late	S	6	6	606S	7	2	0
2018	2018-09-05	August/September	3Late	S	6	6	606S	12	0	0
2019	2019-08-21	August	3Late	S	1	1	101S	4	0	0
2019	2019-08-21	August	3Late	S	1	1	101S	7	0	0
2019	2019-08-21	August	3Late	S	1	1	101S	12	0	0
2019	2019-08-21	August	3Late	S	1	2	102S	4			cage open or flipped
2019	2019-08-21	August	3Late	S	1	2	102S	7	0	10
2019	2019-08-21	August	3Late	S	1	2	102S	12	0	0
2019	2019-08-21	August	3Late	S	1	3	103S	4	7	19
2019	2019-08-21	August	3Late	S	1	3	103S	7			cage open or flipped
2019	2019-08-21	August	3Late	S	1	3	103S	12	0	0
2019	2019-08-21	August	3Late	S	1	4	104S	4	0	13
2019	2019-08-21	August	3Late	S	1	4	104S	7			cage open or flipped
2019	2019-08-21	August	3Late	S	1	4	104S	12	0	0
2019	2019-08-21	August	3Late	S	1	5	105S	4	22	16
2019	2019-08-21	August	3Late	S	1	5	105S	7	0	1
2019	2019-08-21	August	3Late	S	1	5	105S	12	0	8
2019	2019-08-21	August	3Late	S	1	6	106S	4	21	18
2019	2019-08-21	August	3Late	S	1	6	106S	7	19	18
2019	2019-08-21	August	3Late	S	1	6	106S	12	18	18
2019	2019-08-21	August	3Late	S	2	1	201S	4	0	0
2019	2019-08-21	August	3Late	S	2	1	201S	7	0	4
2019	2019-08-21	August	3Late	S	2	1	201S	12	3	17
2019	2019-08-21	August	3Late	S	2	2	202S	4	0	1
2019	2019-08-21	August	3Late	S	2	2	202S	7	1	6
2019	2019-08-21	August	3Late	S	2	2	202S	12			cage open or flipped
2019	2019-08-21	August	3Late	S	2	3	203S	4	13	17
2019	2019-08-21	August	3Late	S	2	3	203S	7	21	20
2019	2019-08-21	August	3Late	S	2	3	203S	12	14	16
2019	2019-08-21	August	3Late	S	2	4	204S	4	0	19
2019	2019-08-21	August	3Late	S	2	4	204S	7	16	18
2019	2019-08-21	August	3Late	S	2	4	204S	12	17	16
2019	2019-08-21	August	3Late	S	2	5	205S	4	2	18
2019	2019-08-21	August	3Late	S	2	5	205S	7	17	20
2019	2019-08-21	August	3Late	S	2	5	205S	12	9	15
2019	2019-08-21	August	3Late	S	2	6	206S	4	18	16
2019	2019-08-21	August	3Late	S	2	6	206S	7	29	18
2019	2019-08-21	August	3Late	S	2	6	206S	12	0	1
2019	2019-08-21	August	3Late	S	3	1	301S	4			cage open or flipped
2019	2019-08-21	August	3Late	S	3	1	301S	7	25	13
2019	2019-08-21	August	3Late	S	3	1	301S	12	30	15
2019	2019-08-21	August	3Late	S	3	2	302S	4	28	18
2019	2019-08-21	August	3Late	S	3	2	302S	7	22	16
2019	2019-08-21	August	3Late	S	3	2	302S	12			cage open or flipped
2019	2019-08-21	August	3Late	S	3	3	303S	4	21	11
2019	2019-08-21	August	3Late	S	3	3	303S	7	27	18
2019	2019-08-21	August	3Late	S	3	3	303S	12	20	19
2019	2019-08-21	August	3Late	S	3	4	304S	4	0	15
2019	2019-08-21	August	3Late	S	3	4	304S	7			cage open or flipped
2019	2019-08-21	August	3Late	S	3	4	304S	12	14	19
2019	2019-08-21	August	3Late	S	3	5	305S	4	17	13
2019	2019-08-21	August	3Late	S	3	5	305S	7	28	16
2019	2019-08-21	August	3Late	S	3	5	305S	12	15	17
2019	2019-08-21	August	3Late	S	3	6	306S	4	14	19
2019	2019-08-21	August	3Late	S	3	6	306S	7	0	18
2019	2019-08-21	August	3Late	S	3	6	306S	12	30	19
2019	2019-08-21	August	3Late	S	4	1	401S	4	30	19
2019	2019-08-21	August	3Late	S	4	1	401S	7	27	17
2019	2019-08-21	August	3Late	S	4	1	401S	12	28	20
2019	2019-08-21	August	3Late	S	4	2	402S	4	29	20
2019	2019-08-21	August	3Late	S	4	2	402S	7			cage open or flipped
2019	2019-08-21	August	3Late	S	4	2	402S	12	25	19
2019	2019-08-21	August	3Late	S	4	3	403S	4	0	7
2019	2019-08-21	August	3Late	S	4	3	403S	7	18	14
2019	2019-08-21	August	3Late	S	4	3	403S	12	9	17
2019	2019-08-21	August	3Late	S	4	4	404S	4			cage open or flipped
2019	2019-08-21	August	3Late	S	4	4	404S	7			cage open or flipped
2019	2019-08-21	August	3Late	S	4	4	404S	12			cage open or flipped
2019	2019-08-21	August	3Late	S	4	5	405S	4			cage open or flipped
2019	2019-08-21	August	3Late	S	4	5	405S	7	28	18
2019	2019-08-21	August	3Late	S	4	5	405S	12	30	19
2019	2019-08-21	August	3Late	S	4	6	406S	4			cage open or flipped
2019	2019-08-21	August	3Late	S	4	6	406S	7	21	18
2019	2019-08-21	August	3Late	S	4	6	406S	12			cage open or flipped
2019	2019-08-21	August	3Late	S	5	1	501S	4	0	11
2019	2019-08-21	August	3Late	S	5	1	501S	7			cage open or flipped
2019	2019-08-21	August	3Late	S	5	1	501S	12			cage open or flipped
2019	2019-08-21	August	3Late	S	5	2	502S	4	0	20
2019	2019-08-21	August	3Late	S	5	2	502S	7	0	3
2019	2019-08-21	August	3Late	S	5	2	502S	12			cage open or flipped
2019	2019-08-21	August	3Late	S	5	3	503S	4			cage open or flipped
2019	2019-08-21	August	3Late	S	5	3	503S	7	12	18
2019	2019-08-21	August	3Late	S	5	3	503S	12			cage open or flipped
2019	2019-08-21	August	3Late	S	5	4	504S	4			cage open or flipped
2019	2019-08-21	August	3Late	S	5	4	504S	7	15	20
2019	2019-08-21	August	3Late	S	5	4	504S	12	13	18
2019	2019-08-21	August	3Late	S	5	5	505S	4	25	20
2019	2019-08-21	August	3Late	S	5	5	505S	7	20	14
2019	2019-08-21	August	3Late	S	5	5	505S	12			cage open or flipped
2019	2019-08-21	August	3Late	S	5	6	506S	4	20	18
2019	2019-08-21	August	3Late	S	5	6	506S	7	20	14
2019	2019-08-21	August	3Late	S	5	6	506S	12			cage open or flipped
2019	2019-08-21	August	3Late	S	6	1	601S	4			cage open or flipped
2019	2019-08-21	August	3Late	S	6	1	601S	7	19	19
2019	2019-08-21	August	3Late	S	6	1	601S	12			cage open or flipped
2019	2019-08-21	August	3Late	S	6	2	602S	4			cage open or flipped
2019	2019-08-21	August	3Late	S	6	2	602S	7	28	15
2019	2019-08-21	August	3Late	S	6	2	602S	12			cage open or flipped
2019	2019-08-21	August	3Late	S	6	3	603S	4	29	19
2019	2019-08-21	August	3Late	S	6	3	603S	7			cage open or flipped
2019	2019-08-21	August	3Late	S	6	3	603S	12	0	11
2019	2019-08-21	August	3Late	S	6	4	604S	4	0	4
2019	2019-08-21	August	3Late	S	6	4	604S	7	29	18
2019	2019-08-21	August	3Late	S	6	4	604S	12			cage open or flipped
2019	2019-08-21	August	3Late	S	6	5	605S	4	27	16
2019	2019-08-21	August	3Late	S	6	5	605S	7			cage open or flipped
2019	2019-08-21	August	3Late	S	6	5	605S	12	0	8
2019	2019-08-21	August	3Late	S	6	6	606S	4	0	15
2019	2019-08-21	August	3Late	S	6	6	606S	7	20	11
2019	2019-08-21	August	3Late	S	6	6	606S	12	6	0
2019	2019-08-28	August	3Late	N	1	1	101N	4	30	20
2019	2019-08-28	August	3Late	N	1	1	101N	7	13	12
2019	2019-08-28	August	3Late	N	1	1	101N	12	11	6
2019	2019-08-28	August	3Late	N	1	2	102N	4	26	18
2019	2019-08-28	August	3Late	N	1	2	102N	7	17	8
2019	2019-08-28	August	3Late	N	1	2	102N	12	5	8
2019	2019-08-28	August	3Late	N	1	3	103N	4	0	12
2019	2019-08-28	August	3Late	N	1	3	103N	7	16	10
2019	2019-08-28	August	3Late	N	1	3	103N	12	16	17
2019	2019-08-28	August	3Late	N	1	4	104N	4	26	18
2019	2019-08-28	August	3Late	N	1	4	104N	7	16	16
2019	2019-08-28	August	3Late	N	1	4	104N	12	14	15
2019	2019-08-28	August	3Late	N	1	5	105N	4	11	7
2019	2019-08-28	August	3Late	N	1	5	105N	7	28	17
2019	2019-08-28	August	3Late	N	1	5	105N	12	23	13
2019	2019-08-28	August	3Late	N	1	6	106N	4	29	17
2019	2019-08-28	August	3Late	N	1	6	106N	7	11	14
2019	2019-08-28	August	3Late	N	1	6	106N	12	27	16
2019	2019-08-28	August	3Late	N	2	1	201N	4	23	18
2019	2019-08-28	August	3Late	N	2	1	201N	7	27	13
2019	2019-08-28	August	3Late	N	2	1	201N	12	7	9
2019	2019-08-28	August	3Late	N	2	2	202N	4	0	14
2019	2019-08-28	August	3Late	N	2	2	202N	7	5	1
2019	2019-08-28	August	3Late	N	2	2	202N	12	0	9
2019	2019-08-28	August	3Late	N	2	3	203N	4	25	10
2019	2019-08-28	August	3Late	N	2	3	203N	7	30	18
2019	2019-08-28	August	3Late	N	2	3	203N	12	0	14
2019	2019-08-28	August	3Late	N	2	4	204N	4	24	18
2019	2019-08-28	August	3Late	N	2	4	204N	7	27	10
2019	2019-08-28	August	3Late	N	2	4	204N	12	14	15
2019	2019-08-28	August	3Late	N	2	5	205N	4	27	15
2019	2019-08-28	August	3Late	N	2	5	205N	7	26	12
2019	2019-08-28	August	3Late	N	2	5	205N	12	23	10
2019	2019-08-28	August	3Late	N	2	6	206N	4
2019	2019-08-28	August	3Late	N	2	6	206N	7	5	8
2019	2019-08-28	August	3Late	N	2	6	206N	12	19	17
2019	2019-08-28	August	3Late	N	3	1	301N	4	6	17
2019	2019-08-28	August	3Late	N	3	1	301N	7	9	13
2019	2019-08-28	August	3Late	N	3	1	301N	12	27	17
2019	2019-08-28	August	3Late	N	3	2	302N	4	7	19
2019	2019-08-28	August	3Late	N	3	2	302N	7	27	14
2019	2019-08-28	August	3Late	N	3	2	302N	12	27	12
2019	2019-08-28	August	3Late	N	3	3	303N	4	2	10
2019	2019-08-28	August	3Late	N	3	3	303N	7	8	18
2019	2019-08-28	August	3Late	N	3	3	303N	12	14	15
2019	2019-08-28	August	3Late	N	3	4	304N	4	28	18
2019	2019-08-28	August	3Late	N	3	4	304N	7	25	17
2019	2019-08-28	August	3Late	N	3	4	304N	12	26	16
2019	2019-08-28	August	3Late	N	3	5	305N	4	23	19
2019	2019-08-28	August	3Late	N	3	5	305N	7	29	17
2019	2019-08-28	August	3Late	N	3	5	305N	12	28	20
2019	2019-08-28	August	3Late	N	3	6	306N	4	22	15
2019	2019-08-28	August	3Late	N	3	6	306N	7	25	19
2019	2019-08-28	August	3Late	N	3	6	306N	12	27	19
2019	2019-08-28	August	3Late	N	4	1	401N	4	28	13
2019	2019-08-28	August	3Late	N	4	1	401N	7	5	12
2019	2019-08-28	August	3Late	N	4	1	401N	12	9	13
2019	2019-08-28	August	3Late	N	4	2	402N	4	16	17
2019	2019-08-28	August	3Late	N	4	2	402N	7	28	18
2019	2019-08-28	August	3Late	N	4	2	402N	12	17	15
2019	2019-08-28	August	3Late	N	4	3	403N	4	11	15
2019	2019-08-28	August	3Late	N	4	3	403N	7	20	17
2019	2019-08-28	August	3Late	N	4	3	403N	12	26	11
2019	2019-08-28	August	3Late	N	4	4	404N	4	30	19
2019	2019-08-28	August	3Late	N	4	4	404N	7	28	18
2019	2019-08-28	August	3Late	N	4	4	404N	12	6	9
2019	2019-08-28	August	3Late	N	4	5	405N	4	26	17
2019	2019-08-28	August	3Late	N	4	5	405N	7	28	18
2019	2019-08-28	August	3Late	N	4	5	405N	12
2019	2019-08-28	August	3Late	N	4	6	406N	4	27	14
2019	2019-08-28	August	3Late	N	4	6	406N	7	24	17
2019	2019-08-28	August	3Late	N	4	6	406N	12	15	16
2019	2019-08-28	August	3Late	N	5	1	501N	4	29	16
2019	2019-08-28	August	3Late	N	5	1	501N	7	6	7
2019	2019-08-28	August	3Late	N	5	1	501N	12	7	14
2019	2019-08-28	August	3Late	N	5	2	502N	4	9	5
2019	2019-08-28	August	3Late	N	5	2	502N	7	29	19
2019	2019-08-28	August	3Late	N	5	2	502N	12
2019	2019-08-28	August	3Late	N	5	3	503N	4	27	18
2019	2019-08-28	August	3Late	N	5	3	503N	7	22	15
2019	2019-08-28	August	3Late	N	5	3	503N	12	30	17
2019	2019-08-28	August	3Late	N	5	4	504N	4	25	14
2019	2019-08-28	August	3Late	N	5	4	504N	7	28	18
2019	2019-08-28	August	3Late	N	5	4	504N	12	6	8
2019	2019-08-28	August	3Late	N	5	5	505N	4	27	15
2019	2019-08-28	August	3Late	N	5	5	505N	7	26	18
2019	2019-08-28	August	3Late	N	5	5	505N	12	22	15
2019	2019-08-28	August	3Late	N	5	6	506N	4	10	12
2019	2019-08-28	August	3Late	N	5	6	506N	7	8	15
2019	2019-08-28	August	3Late	N	5	6	506N	12	3	13
2019	2019-08-28	August	3Late	N	6	1	601N	4	10	11
2019	2019-08-28	August	3Late	N	6	1	601N	7	6	4
2019	2019-08-28	August	3Late	N	6	1	601N	12	26	15
2019	2019-08-28	August	3Late	N	6	2	602N	4	5	7
2019	2019-08-28	August	3Late	N	6	2	602N	7	22	15
2019	2019-08-28	August	3Late	N	6	2	602N	12	13	15
2019	2019-08-28	August	3Late	N	6	3	603N	4	10	10
2019	2019-08-28	August	3Late	N	6	3	603N	7	19	18
2019	2019-08-28	August	3Late	N	6	3	603N	12	25	11
2019	2019-08-28	August	3Late	N	6	4	604N	4	28	16
2019	2019-08-28	August	3Late	N	6	4	604N	7	11	12
2019	2019-08-28	August	3Late	N	6	4	604N	12	15	17
2019	2019-08-28	August	3Late	N	6	5	605N	4	26	18
2019	2019-08-28	August	3Late	N	6	5	605N	7	24	19
2019	2019-08-28	August	3Late	N	6	5	605N	12	30	18
2019	2019-08-28	August	3Late	N	6	6	606N	4	5	16
2019	2019-08-28	August	3Late	N	6	6	606N	7
2019	2019-08-28	August	3Late	N	6	6	606N	12	4	13
2017	2017-07-26	July/August	2Mid	S	1	1	101S	4	29	18
2017	2017-07-26	July/August	2Mid	S	1	1	101S	7	34	13
2017	2017-07-26	July/August	2Mid	S	1	1	101S	12	10	3
2017	2017-07-26	July/August	2Mid	S	1	2	102S	4	19	18
2017	2017-07-26	July/August	2Mid	S	1	2	102S	7	4	15
2017	2017-07-26	July/August	2Mid	S	1	2	102S	12	16	13
2017	2017-07-26	July/August	2Mid	S	1	3	103S	4	29	10
2017	2017-07-26	July/August	2Mid	S	1	3	103S	7	1	10
2017	2017-07-26	July/August	2Mid	S	1	3	103S	12	29	2
2017	2017-07-26	July/August	2Mid	S	1	4	104S	4	5	5
2017	2017-07-26	July/August	2Mid	S	1	4	104S	7	12	13
2017	2017-07-26	July/August	2Mid	S	1	4	104S	12	2	0
2017	2017-07-26	July/August	2Mid	S	1	5	105S	4	22	12
2017	2017-07-26	July/August	2Mid	S	1	5	105S	7	27	13
2017	2017-07-26	July/August	2Mid	S	1	5	105S	12	23	3
2017	2017-07-26	July/August	2Mid	S	1	6	106S	4	28	20
2017	2017-07-26	July/August	2Mid	S	1	6	106S	7	29	1
2017	2017-07-26	July/August	2Mid	S	1	6	106S	12	32	20
2017	2017-07-26	July/August	2Mid	S	2	1	201S	4	28	21
2017	2017-07-26	July/August	2Mid	S	2	1	201S	7	1	0
2017	2017-07-26	July/August	2Mid	S	2	1	201S	12	28	17
2017	2017-07-26	July/August	2Mid	S	2	2	202S	4	30	11
2017	2017-07-26	July/August	2Mid	S	2	2	202S	7	28	18
2017	2017-07-26	July/August	2Mid	S	2	2	202S	12	30	4
2017	2017-07-26	July/August	2Mid	S	2	3	203S	4	30	17
2017	2017-07-26	July/August	2Mid	S	2	3	203S	7	27	19
2017	2017-07-26	July/August	2Mid	S	2	3	203S	12	28	18
2017	2017-07-26	July/August	2Mid	S	2	4	204S	4	30	8
2017	2017-07-26	July/August	2Mid	S	2	4	204S	7	28	19
2017	2017-07-26	July/August	2Mid	S	2	4	204S	12	16	12
2017	2017-07-26	July/August	2Mid	S	2	5	205S	4	29	18
2017	2017-07-26	July/August	2Mid	S	2	5	205S	7	30	20
2017	2017-07-26	July/August	2Mid	S	2	5	205S	12	23	12
2017	2017-07-26	July/August	2Mid	S	2	6	206S	4	27	15
2017	2017-07-26	July/August	2Mid	S	2	6	206S	7	30	7
2017	2017-07-26	July/August	2Mid	S	2	6	206S	12	20	17
2017	2017-07-26	July/August	2Mid	S	3	1	301S	4	34	21
2017	2017-07-26	July/August	2Mid	S	3	1	301S	7	4	3
2017	2017-07-26	July/August	2Mid	S	3	1	301S	12	30	20
2017	2017-07-26	July/August	2Mid	S	3	2	302S	4	11	18
2017	2017-07-26	July/August	2Mid	S	3	2	302S	7	32	18
2017	2017-07-26	July/August	2Mid	S	3	2	302S	12	30	18
2017	2017-07-26	July/August	2Mid	S	3	3	303S	4	30	20
2017	2017-07-26	July/August	2Mid	S	3	3	303S	7	29	20
2017	2017-07-26	July/August	2Mid	S	3	3	303S	12	26	17
2017	2017-07-26	July/August	2Mid	S	3	4	304S	4	5	1
2017	2017-07-26	July/August	2Mid	S	3	4	304S	7	1	4
2017	2017-07-26	July/August	2Mid	S	3	4	304S	12	28	10
2017	2017-07-26	July/August	2Mid	S	3	5	305S	4	28	16
2017	2017-07-26	July/August	2Mid	S	3	5	305S	7	6	12
2017	2017-07-26	July/August	2Mid	S	3	5	305S	12	3	0
2017	2017-07-26	July/August	2Mid	S	3	6	306S	4	27	17
2017	2017-07-26	July/August	2Mid	S	3	6	306S	7	29	7
2017	2017-07-26	July/August	2Mid	S	3	6	306S	12	26	12
2017	2017-07-26	July/August	2Mid	S	4	1	401S	4	30	20
2017	2017-07-26	July/August	2Mid	S	4	1	401S	7	10	19
2017	2017-07-26	July/August	2Mid	S	4	1	401S	12	29	20
2017	2017-07-26	July/August	2Mid	S	4	2	402S	4	12	13
2017	2017-07-26	July/August	2Mid	S	4	2	402S	7	2	0
2017	2017-07-26	July/August	2Mid	S	4	2	402S	12	29	13
2017	2017-07-26	July/August	2Mid	S	4	3	403S	4	3	5
2017	2017-07-26	July/August	2Mid	S	4	3	403S	7	31	15
2017	2017-07-26	July/August	2Mid	S	4	3	403S	12	29	13
2017	2017-07-26	July/August	2Mid	S	4	4	404S	4	22	5
2017	2017-07-26	July/August	2Mid	S	4	4	404S	7	30	23
2017	2017-07-26	July/August	2Mid	S	4	4	404S	12	31	0
2017	2017-07-26	July/August	2Mid	S	4	5	405S	4	30	19
2017	2017-07-26	July/August	2Mid	S	4	5	405S	7	30	19
2017	2017-07-26	July/August	2Mid	S	4	5	405S	12	30	16
2017	2017-07-26	July/August	2Mid	S	4	6	406S	4	28	15
2017	2017-07-26	July/August	2Mid	S	4	6	406S	7	29	16
2017	2017-07-26	July/August	2Mid	S	4	6	406S	12	26	17
2017	2017-07-26	July/August	2Mid	S	5	1	501S	4	2	1
2017	2017-07-26	July/August	2Mid	S	5	1	501S	7	30	13
2017	2017-07-26	July/August	2Mid	S	5	1	501S	12	30	11
2017	2017-07-26	July/August	2Mid	S	5	2	502S	4	31	20
2017	2017-07-26	July/August	2Mid	S	5	2	502S	7	31	10
2017	2017-07-26	July/August	2Mid	S	5	2	502S	12	26	17
2017	2017-07-26	July/August	2Mid	S	5	3	503S	4	28	10
2017	2017-07-26	July/August	2Mid	S	5	3	503S	7	30	21
2017	2017-07-26	July/August	2Mid	S	5	3	503S	12	24	16
2017	2017-07-26	July/August	2Mid	S	5	4	504S	4	30	16
2017	2017-07-26	July/August	2Mid	S	5	4	504S	7	29	17
2017	2017-07-26	July/August	2Mid	S	5	4	504S	12	29	18
2017	2017-07-26	July/August	2Mid	S	5	5	505S	4	31	17
2017	2017-07-26	July/August	2Mid	S	5	5	505S	7	28	21
2017	2017-07-26	July/August	2Mid	S	5	5	505S	12	25	14
2017	2017-07-26	July/August	2Mid	S	5	6	506S	7	11	19
2017	2017-07-26	July/August	2Mid	S	5	6	506S	12	30	19
2017	2017-07-26	July/August	2Mid	S	5	6	506S	4	30	16
2017	2017-07-26	July/August	2Mid	S	6	1	601S	4	30	16
2017	2017-07-26	July/August	2Mid	S	6	1	601S	7	11	19
2017	2017-07-26	July/August	2Mid	S	6	1	601S	12	30	19
2017	2017-07-26	July/August	2Mid	S	6	2	602S	4	25	19
2017	2017-07-26	July/August	2Mid	S	6	2	602S	7	30	16
2017	2017-07-26	July/August	2Mid	S	6	2	602S	12	28	8
2017	2017-07-26	July/August	2Mid	S	6	3	603S	4	29	30
2017	2017-07-26	July/August	2Mid	S	6	3	603S	7	30	18
2017	2017-07-26	July/August	2Mid	S	6	3	603S	12	27	17
2017	2017-07-26	July/August	2Mid	S	6	4	604S	7	33	15
2017	2017-07-26	July/August	2Mid	S	6	4	604S	12	30	19
2017	2017-07-26	July/August	2Mid	S	6	4	604S	4	29	30
2017	2017-07-26	July/August	2Mid	S	6	5	605S	7	30	18
2017	2017-07-26	July/August	2Mid	S	6	5	605S	12	27	17
2017	2017-07-26	July/August	2Mid	S	6	5	605S	4	28	16
2017	2017-07-26	July/August	2Mid	S	6	6	606S	4	11	19
2017	2017-07-26	July/August	2Mid	S	6	6	606S	7	5	14
2017	2017-07-26	July/August	2Mid	S	6	6	606S	12	31	17
2017	2017-08-10	July/August	2Mid	N	1	1	101N	4	34	20
2017	2017-08-10	July/August	2Mid	N	1	1	101N	7	31	10
2017	2017-08-10	July/August	2Mid	N	1	1	101N	12	31	20
2017	2017-08-10	July/August	2Mid	N	1	2	102N	4	32	20
2017	2017-08-10	July/August	2Mid	N	1	2	102N	7	30	19
2017	2017-08-10	July/August	2Mid	N	1	2	102N	12	28	20
2017	2017-08-10	July/August	2Mid	N	1	3	103N	4	29	17
2017	2017-08-10	July/August	2Mid	N	1	3	103N	7	28	13
2017	2017-08-10	July/August	2Mid	N	1	3	103N	12	31	19
2017	2017-08-10	July/August	2Mid	N	1	4	104N	4	28	19
2017	2017-08-10	July/August	2Mid	N	1	4	104N	7	1	0
2017	2017-08-10	July/August	2Mid	N	1	4	104N	12	18	14
2017	2017-08-10	July/August	2Mid	N	1	5	105N	4	31	19
2017	2017-08-10	July/August	2Mid	N	1	5	105N	7	27	12
2017	2017-08-10	July/August	2Mid	N	1	5	105N	12	31	17
2017	2017-08-10	July/August	2Mid	N	1	6	106N	4	34	15
2017	2017-08-10	July/August	2Mid	N	1	6	106N	7	31	17
2017	2017-08-10	July/August	2Mid	N	1	6	106N	12	28	18
2017	2017-08-10	July/August	2Mid	N	2	1	201N	4	31	19
2017	2017-08-10	July/August	2Mid	N	2	1	201N	7	26	7
2017	2017-08-10	July/August	2Mid	N	2	1	201N	12	29	20
2017	2017-08-10	July/August	2Mid	N	2	2	202N	4	28	17
2017	2017-08-10	July/August	2Mid	N	2	2	202N	7	0	0
2017	2017-08-10	July/August	2Mid	N	2	2	202N	12	30	19
2017	2017-08-10	July/August	2Mid	N	2	3	203N	4	29	21
2017	2017-08-10	July/August	2Mid	N	2	3	203N	7	27	9
2017	2017-08-10	July/August	2Mid	N	2	3	203N	12	32	19
2017	2017-08-10	July/August	2Mid	N	2	4	204N	4	30	21
2017	2017-08-10	July/August	2Mid	N	2	4	204N	7	29	16
2017	2017-08-10	July/August	2Mid	N	2	4	204N	12	28	19
2017	2017-08-10	July/August	2Mid	N	2	5	205N	4	29	9
2017	2017-08-10	July/August	2Mid	N	2	5	205N	7	30	13
2017	2017-08-10	July/August	2Mid	N	2	5	205N	12	31	20
2017	2017-08-10	July/August	2Mid	N	2	6	206N	4	30	19
2017	2017-08-10	July/August	2Mid	N	2	6	206N	7	29	17
2017	2017-08-10	July/August	2Mid	N	2	6	206N	12	30	19
2017	2017-08-10	July/August	2Mid	N	3	1	301N	4	25	10
2017	2017-08-10	July/August	2Mid	N	3	1	301N	7	29	18
2017	2017-08-10	July/August	2Mid	N	3	1	301N	12	31	10
2017	2017-08-10	July/August	2Mid	N	3	2	302N	4	32	16
2017	2017-08-10	July/August	2Mid	N	3	2	302N	7	31	20
2017	2017-08-10	July/August	2Mid	N	3	2	302N	12	31	18
2017	2017-08-10	July/August	2Mid	N	3	3	303N	4	32	16
2017	2017-08-10	July/August	2Mid	N	3	3	303N	7	30	14
2017	2017-08-10	July/August	2Mid	N	3	3	303N	12	19	18
2017	2017-08-10	July/August	2Mid	N	3	4	304N	4	31	7
2017	2017-08-10	July/August	2Mid	N	3	4	304N	7	30	7
2017	2017-08-10	July/August	2Mid	N	3	4	304N	12	30	17
2017	2017-08-10	July/August	2Mid	N	3	5	305N	4	31	16
2017	2017-08-10	July/August	2Mid	N	3	5	305N	7	33	16
2017	2017-08-10	July/August	2Mid	N	3	5	305N	12	26	15
2017	2017-08-10	July/August	2Mid	N	3	6	306N	4	28	9
2017	2017-08-10	July/August	2Mid	N	3	6	306N	7	29	19
2017	2017-08-10	July/August	2Mid	N	3	6	306N	12	31	19
2017	2017-08-10	July/August	2Mid	N	4	1	401N	4	3	11
2017	2017-08-10	July/August	2Mid	N	4	1	401N	7	29	18
2017	2017-08-10	July/August	2Mid	N	4	1	401N	12	30	12
2017	2017-08-10	July/August	2Mid	N	4	2	402N	4	30	17
2017	2017-08-10	July/August	2Mid	N	4	2	402N	7	31	14
2017	2017-08-10	July/August	2Mid	N	4	2	402N	12	15	2
2017	2017-08-10	July/August	2Mid	N	4	3	403N	4	28	20
2017	2017-08-10	July/August	2Mid	N	4	3	403N	7	32	15
2017	2017-08-10	July/August	2Mid	N	4	3	403N	12	7	0
2017	2017-08-10	July/August	2Mid	N	4	4	404N	4	31	21
2017	2017-08-10	July/August	2Mid	N	4	4	404N	7	28	19
2017	2017-08-10	July/August	2Mid	N	4	4	404N	12	29	14
2017	2017-08-10	July/August	2Mid	N	4	5	405N	4	30	20
2017	2017-08-10	July/August	2Mid	N	4	5	405N	7	30	19
2017	2017-08-10	July/August	2Mid	N	4	5	405N	12	30	12
2017	2017-08-10	July/August	2Mid	N	4	6	406N	4	29	18
2017	2017-08-10	July/August	2Mid	N	4	6	406N	7	28	10
2017	2017-08-10	July/August	2Mid	N	4	6	406N	12	34	18
2017	2017-08-10	July/August	2Mid	N	5	1	501N	4	29	21
2017	2017-08-10	July/August	2Mid	N	5	1	501N	7	14	12
2017	2017-08-10	July/August	2Mid	N	5	1	501N	12	27	12
2017	2017-08-10	July/August	2Mid	N	5	2	502N	4	30	19
2017	2017-08-10	July/August	2Mid	N	5	2	502N	7	30	19
2017	2017-08-10	July/August	2Mid	N	5	2	502N	12	29	19
2017	2017-08-10	July/August	2Mid	N	5	3	503N	4	29	18
2017	2017-08-10	July/August	2Mid	N	5	3	503N	7	30	18
2017	2017-08-10	July/August	2Mid	N	5	3	503N	12	29	20
2017	2017-08-10	July/August	2Mid	N	5	4	504N	4	31	20
2017	2017-08-10	July/August	2Mid	N	5	4	504N	7	29	17
2017	2017-08-10	July/August	2Mid	N	5	4	504N	12	31	16
2017	2017-08-10	July/August	2Mid	N	5	5	505N	4	28	9
2017	2017-08-10	July/August	2Mid	N	5	5	505N	7	29	19
2017	2017-08-10	July/August	2Mid	N	5	5	505N	12	31	13
2017	2017-08-10	July/August	2Mid	N	5	6	506N	4	30	20
2017	2017-08-10	July/August	2Mid	N	5	6	506N	7	2	15
2017	2017-08-10	July/August	2Mid	N	5	6	506N	12	30	17
2017	2017-08-10	July/August	2Mid	N	6	1	601N	4	29	17
2017	2017-08-10	July/August	2Mid	N	6	1	601N	7	29	20
2017	2017-08-10	July/August	2Mid	N	6	1	601N	12	30	13
2017	2017-08-10	July/August	2Mid	N	6	2	602N	4	30	19
2017	2017-08-10	July/August	2Mid	N	6	2	602N	7	31	18
2017	2017-08-10	July/August	2Mid	N	6	2	602N	12	30	17
2017	2017-08-10	July/August	2Mid	N	6	3	603N	4	30	20
2017	2017-08-10	July/August	2Mid	N	6	3	603N	7	31	17
2017	2017-08-10	July/August	2Mid	N	6	3	603N	12	18	11
2017	2017-08-10	July/August	2Mid	N	6	4	604N	4	17	8
2017	2017-08-10	July/August	2Mid	N	6	4	604N	7	33	19
2017	2017-08-10	July/August	2Mid	N	6	4	604N	12	33	20
2017	2017-08-10	July/August	2Mid	N	6	5	605N	4	30	19
2017	2017-08-10	July/August	2Mid	N	6	5	605N	7	30	18
2017	2017-08-10	July/August	2Mid	N	6	5	605N	12	30	18
2017	2017-08-10	July/August	2Mid	N	6	6	606N	4	29	19
2017	2017-08-10	July/August	2Mid	N	6	6	606N	7	30	18
2017	2017-08-10	July/August	2Mid	N	6	6	606N	12	31	17
2018	2018-07-19	July/August	2Mid	N	1	1	101N	4	2	19
2018	2018-07-19	July/August	2Mid	N	1	1	101N	7	30	17
2018	2018-07-19	July/August	2Mid	N	1	1	101N	12	30	19
2018	2018-07-19	July/August	2Mid	N	1	2	102N	4	30	10
2018	2018-07-19	July/August	2Mid	N	1	2	102N	7
2018	2018-07-19	July/August	2Mid	N	1	2	102N	12	30	17
2018	2018-07-19	July/August	2Mid	N	1	3	103N	4	30	10
2018	2018-07-19	July/August	2Mid	N	1	3	103N	7	2	9
2018	2018-07-19	July/August	2Mid	N	1	3	103N	12	29	17
2018	2018-07-19	July/August	2Mid	N	1	4	104N	4	29	18
2018	2018-07-19	July/August	2Mid	N	1	4	104N	7	1	7
2018	2018-07-19	July/August	2Mid	N	1	4	104N	12	22	14
2018	2018-07-19	July/August	2Mid	N	1	5	105N	4	29	17
2018	2018-07-19	July/August	2Mid	N	1	5	105N	7	27	19
2018	2018-07-19	July/August	2Mid	N	1	5	105N	12	14	13
2018	2018-07-19	July/August	2Mid	N	1	6	106N	4	22	20
2018	2018-07-19	July/August	2Mid	N	1	6	106N	7	6	7
2018	2018-07-19	July/August	2Mid	N	1	6	106N	12	1	10
2018	2018-07-19	July/August	2Mid	N	2	1	201N	4	30	18
2018	2018-07-19	July/August	2Mid	N	2	1	201N	7	29	20
2018	2018-07-19	July/August	2Mid	N	2	1	201N	12	30	11
2018	2018-07-19	July/August	2Mid	N	2	2	202N	4
2018	2018-07-19	July/August	2Mid	N	2	2	202N	7	24	14
2018	2018-07-19	July/August	2Mid	N	2	2	202N	12
2018	2018-07-19	July/August	2Mid	N	2	3	203N	4	24	17
2018	2018-07-19	July/August	2Mid	N	2	3	203N	7	24	10
2018	2018-07-19	July/August	2Mid	N	2	3	203N	12	25	17
2018	2018-07-19	July/August	2Mid	N	2	4	204N	4	29	16
2018	2018-07-19	July/August	2Mid	N	2	4	204N	7	25	16
2018	2018-07-19	July/August	2Mid	N	2	4	204N	12	7	4
2018	2018-07-19	July/August	2Mid	N	2	5	205N	4	26	20
2018	2018-07-19	July/August	2Mid	N	2	5	205N	7	29	18
2018	2018-07-19	July/August	2Mid	N	2	5	205N	12	1	0
2018	2018-07-19	July/August	2Mid	N	2	6	206N	4	28	20
2018	2018-07-19	July/August	2Mid	N	2	6	206N	7	1	0
2018	2018-07-19	July/August	2Mid	N	2	6	206N	12	25	18
2018	2018-07-19	July/August	2Mid	N	3	1	301N	4	24	18
2018	2018-07-19	July/August	2Mid	N	3	1	301N	7	26	18
2018	2018-07-19	July/August	2Mid	N	3	1	301N	12	28	12
2018	2018-07-19	July/August	2Mid	N	3	2	302N	4	28	16
2018	2018-07-19	July/August	2Mid	N	3	2	302N	7	3	16
2018	2018-07-19	July/August	2Mid	N	3	2	302N	12	30	20
2018	2018-07-19	July/August	2Mid	N	3	3	303N	4	29	20
2018	2018-07-19	July/August	2Mid	N	3	3	303N	7	18	11
2018	2018-07-19	July/August	2Mid	N	3	3	303N	12	29	14
2018	2018-07-19	July/August	2Mid	N	3	4	304N	4	3	13
2018	2018-07-19	July/August	2Mid	N	3	4	304N	7	27	18
2018	2018-07-19	July/August	2Mid	N	3	4	304N	12	26	17
2018	2018-07-19	July/August	2Mid	N	3	5	305N	4	28	16
2018	2018-07-19	July/August	2Mid	N	3	5	305N	7	25	8
2018	2018-07-19	July/August	2Mid	N	3	5	305N	12	29	16
2018	2018-07-19	July/August	2Mid	N	3	6	306N	4	25	11
2018	2018-07-19	July/August	2Mid	N	3	6	306N	7	11	12
2018	2018-07-19	July/August	2Mid	N	3	6	306N	12	11	9
2018	2018-07-19	July/August	2Mid	N	4	1	401N	4	5	2
2018	2018-07-19	July/August	2Mid	N	4	1	401N	7	28	17
2018	2018-07-19	July/August	2Mid	N	4	1	401N	12	24	15
2018	2018-07-19	July/August	2Mid	N	4	2	402N	4	25	17
2018	2018-07-19	July/August	2Mid	N	4	2	402N	7	25	16
2018	2018-07-19	July/August	2Mid	N	4	2	402N	12	24	15
2018	2018-07-19	July/August	2Mid	N	4	3	403N	4	30	18
2018	2018-07-19	July/August	2Mid	N	4	3	403N	7	24	20
2018	2018-07-19	July/August	2Mid	N	4	3	403N	12	23	19
2018	2018-07-19	July/August	2Mid	N	4	4	404N	4	28	11
2018	2018-07-19	July/August	2Mid	N	4	4	404N	7	30	16
2018	2018-07-19	July/August	2Mid	N	4	4	404N	12	25	13
2018	2018-07-19	July/August	2Mid	N	4	5	405N	4	27	20
2018	2018-07-19	July/August	2Mid	N	4	5	405N	7
2018	2018-07-19	July/August	2Mid	N	4	5	405N	12	29	15
2018	2018-07-19	July/August	2Mid	N	4	6	406N	4	27	3
2018	2018-07-19	July/August	2Mid	N	4	6	406N	7	23	16
2018	2018-07-19	July/August	2Mid	N	4	6	406N	12	1	10
2018	2018-07-19	July/August	2Mid	N	5	1	501N	4	28	18
2018	2018-07-19	July/August	2Mid	N	5	1	501N	7	26	17
2018	2018-07-19	July/August	2Mid	N	5	1	501N	12	19	18
2018	2018-07-19	July/August	2Mid	N	5	2	502N	4	21	16
2018	2018-07-19	July/August	2Mid	N	5	2	502N	7	24	15
2018	2018-07-19	July/August	2Mid	N	5	2	502N	12	28	13
2018	2018-07-19	July/August	2Mid	N	5	3	503N	4	25	15
2018	2018-07-19	July/August	2Mid	N	5	3	503N	7	0	5
2018	2018-07-19	July/August	2Mid	N	5	3	503N	12	1	12
2018	2018-07-19	July/August	2Mid	N	5	4	504N	4	26	19
2018	2018-07-19	July/August	2Mid	N	5	4	504N	7	28	15
2018	2018-07-19	July/August	2Mid	N	5	4	504N	12	29	18
2018	2018-07-19	July/August	2Mid	N	5	5	505N	4	30	17
2018	2018-07-19	July/August	2Mid	N	5	5	505N	7	0	7
2018	2018-07-19	July/August	2Mid	N	5	5	505N	12	28	17
2018	2018-07-19	July/August	2Mid	N	5	6	506N	4	1	13
2018	2018-07-19	July/August	2Mid	N	5	6	506N	7	9	13
2018	2018-07-19	July/August	2Mid	N	5	6	506N	12	26	18
2018	2018-07-19	July/August	2Mid	N	6	1	601N	4	24	13
2018	2018-07-19	July/August	2Mid	N	6	1	601N	7	27	13
2018	2018-07-19	July/August	2Mid	N	6	1	601N	12	25	11
2018	2018-07-19	July/August	2Mid	N	6	2	602N	4	26	11
2018	2018-07-19	July/August	2Mid	N	6	2	602N	7	20	14
2018	2018-07-19	July/August	2Mid	N	6	2	602N	12	29	20
2018	2018-07-19	July/August	2Mid	N	6	3	603N	4	29	18
2018	2018-07-19	July/August	2Mid	N	6	3	603N	7	5	9
2018	2018-07-19	July/August	2Mid	N	6	3	603N	12	21	11
2018	2018-07-19	July/August	2Mid	N	6	4	604N	4	27	18
2018	2018-07-19	July/August	2Mid	N	6	4	604N	7	26	14
2018	2018-07-19	July/August	2Mid	N	6	4	604N	12	16	8
2018	2018-07-19	July/August	2Mid	N	6	5	605N	4	0	1
2018	2018-07-19	July/August	2Mid	N	6	5	605N	7	24	14
2018	2018-07-19	July/August	2Mid	N	6	5	605N	12	18	13
2018	2018-07-19	July/August	2Mid	N	6	6	606N	4	16	16
2018	2018-07-19	July/August	2Mid	N	6	6	606N	7	29	18
2018	2018-07-19	July/August	2Mid	N	6	6	606N	12
2018	2018-08-08	July/August	2Mid	S	1	1	101S	4	0	12
2018	2018-08-08	July/August	2Mid	S	1	1	101S	7	30	19
2018	2018-08-08	July/August	2Mid	S	1	1	101S	12	2	3
2018	2018-08-08	July/August	2Mid	S	1	2	102S	4	5	13
2018	2018-08-08	July/August	2Mid	S	1	2	102S	7	2	18
2018	2018-08-08	July/August	2Mid	S	1	2	102S	12	2	15
2018	2018-08-08	July/August	2Mid	S	1	3	103S	4	0	0
2018	2018-08-08	July/August	2Mid	S	1	3	103S	7	0	8
2018	2018-08-08	July/August	2Mid	S	1	3	103S	12	1	0
2018	2018-08-08	July/August	2Mid	S	1	4	104S	4	0	0
2018	2018-08-08	July/August	2Mid	S	1	4	104S	7	1	4
2018	2018-08-08	July/August	2Mid	S	1	4	104S	12	0	0
2018	2018-08-08	July/August	2Mid	S	1	5	105S	4	7	1
2018	2018-08-08	July/August	2Mid	S	1	5	105S	7	2	0
2018	2018-08-08	July/August	2Mid	S	1	5	105S	12	1	15
2018	2018-08-08	July/August	2Mid	S	1	6	106S	4	0	0
2018	2018-08-08	July/August	2Mid	S	1	6	106S	7	1	15
2018	2018-08-08	July/August	2Mid	S	1	6	106S	12	14	17
2018	2018-08-08	July/August	2Mid	S	2	1	201S	4	0	20
2018	2018-08-08	July/August	2Mid	S	2	1	201S	7	28	17
2018	2018-08-08	July/August	2Mid	S	2	1	201S	12	0	12
2018	2018-08-08	July/August	2Mid	S	2	2	202S	4	1	3
2018	2018-08-08	July/August	2Mid	S	2	2	202S	7	1	5
2018	2018-08-08	July/August	2Mid	S	2	2	202S	12	0	1
2018	2018-08-08	July/August	2Mid	S	2	3	203S	4	26	20
2018	2018-08-08	July/August	2Mid	S	2	3	203S	7	0	2
2018	2018-08-08	July/August	2Mid	S	2	3	203S	12	3	0
2018	2018-08-08	July/August	2Mid	S	2	4	204S	4	0	4
2018	2018-08-08	July/August	2Mid	S	2	4	204S	7	20	18
2018	2018-08-08	July/August	2Mid	S	2	4	204S	12	10	19
2018	2018-08-08	July/August	2Mid	S	2	5	205S	4	20	18
2018	2018-08-08	July/August	2Mid	S	2	5	205S	7	0	0
2018	2018-08-08	July/August	2Mid	S	2	5	205S	12	12	18
2018	2018-08-08	July/August	2Mid	S	2	6	206S	4	13	19
2018	2018-08-08	July/August	2Mid	S	2	6	206S	7	21	16
2018	2018-08-08	July/August	2Mid	S	2	6	206S	12	28	17
2018	2018-08-08	July/August	2Mid	S	3	1	301S	4	1	2
2018	2018-08-08	July/August	2Mid	S	3	1	301S	7	3	3
2018	2018-08-08	July/August	2Mid	S	3	1	301S	12	0	0
2018	2018-08-08	July/August	2Mid	S	3	2	302S	4	0	0
2018	2018-08-08	July/August	2Mid	S	3	2	302S	7	4	8
2018	2018-08-08	July/August	2Mid	S	3	2	302S	12	0	0
2018	2018-08-08	July/August	2Mid	S	3	3	303S	4	0	0
2018	2018-08-08	July/August	2Mid	S	3	3	303S	7	0	3
2018	2018-08-08	July/August	2Mid	S	3	3	303S	12	0	4
2018	2018-08-08	July/August	2Mid	S	3	4	304S	4	26	16
2018	2018-08-08	July/August	2Mid	S	3	4	304S	7	6	16
2018	2018-08-08	July/August	2Mid	S	3	4	304S	12	0	12
2018	2018-08-08	July/August	2Mid	S	3	5	305S	4	0	2
2018	2018-08-08	July/August	2Mid	S	3	5	305S	7	24	18
2018	2018-08-08	July/August	2Mid	S	3	5	305S	12	0	10
2018	2018-08-08	July/August	2Mid	S	3	6	306S	4	30	16
2018	2018-08-08	July/August	2Mid	S	3	6	306S	7
2018	2018-08-08	July/August	2Mid	S	3	6	306S	12
2018	2018-08-08	July/August	2Mid	S	4	1	401S	4	18	8
2018	2018-08-08	July/August	2Mid	S	4	1	401S	7	19	20
2018	2018-08-08	July/August	2Mid	S	4	1	401S	12	3	2
2018	2018-08-08	July/August	2Mid	S	4	2	402S	4	16	17
2018	2018-08-08	July/August	2Mid	S	4	2	402S	7	0	0
2018	2018-08-08	July/August	2Mid	S	4	2	402S	12	21	20
2018	2018-08-08	July/August	2Mid	S	4	3	403S	4	4	18
2018	2018-08-08	July/August	2Mid	S	4	3	403S	7	0	0
2018	2018-08-08	July/August	2Mid	S	4	3	403S	12	3	19
2018	2018-08-08	July/August	2Mid	S	4	4	404S	4	7	17
2018	2018-08-08	July/August	2Mid	S	4	4	404S	7
2018	2018-08-08	July/August	2Mid	S	4	4	404S	12	2	2
2018	2018-08-08	July/August	2Mid	S	4	5	405S	4	0	20
2018	2018-08-08	July/August	2Mid	S	4	5	405S	7	2	14
2018	2018-08-08	July/August	2Mid	S	4	5	405S	12	1	12
2018	2018-08-08	July/August	2Mid	S	4	6	406S	4
2018	2018-08-08	July/August	2Mid	S	4	6	406S	7	3	0
2018	2018-08-08	July/August	2Mid	S	4	6	406S	12	0	19
2018	2018-08-08	July/August	2Mid	S	5	1	501S	4	1	2
2018	2018-08-08	July/August	2Mid	S	5	1	501S	7	24	12
2018	2018-08-08	July/August	2Mid	S	5	1	501S	12	0	2
2018	2018-08-08	July/August	2Mid	S	5	2	502S	4	0	1
2018	2018-08-08	July/August	2Mid	S	5	2	502S	7	25	17
2018	2018-08-08	July/August	2Mid	S	5	2	502S	12	0	0
2018	2018-08-08	July/August	2Mid	S	5	3	503S	4	1	0
2018	2018-08-08	July/August	2Mid	S	5	3	503S	7	14	15
2018	2018-08-08	July/August	2Mid	S	5	3	503S	12	26	10
2018	2018-08-08	July/August	2Mid	S	5	4	504S	4	30	16
2018	2018-08-08	July/August	2Mid	S	5	4	504S	7
2018	2018-08-08	July/August	2Mid	S	5	4	504S	12	0	1
2018	2018-08-08	July/August	2Mid	S	5	5	505S	4	1	11
2018	2018-08-08	July/August	2Mid	S	5	5	505S	7	1	13
2018	2018-08-08	July/August	2Mid	S	5	5	505S	12	24	15
2018	2018-08-08	July/August	2Mid	S	5	6	506S	4	3	13
2018	2018-08-08	July/August	2Mid	S	5	6	506S	7	26	20
2018	2018-08-08	July/August	2Mid	S	5	6	506S	12	21	16
2018	2018-08-08	July/August	2Mid	S	6	1	601S	4	0	1
2018	2018-08-08	July/August	2Mid	S	6	1	601S	7	0	0
2018	2018-08-08	July/August	2Mid	S	6	1	601S	12	1	4
2018	2018-08-08	July/August	2Mid	S	6	2	602S	4	16	2
2018	2018-08-08	July/August	2Mid	S	6	2	602S	7	2	0
2018	2018-08-08	July/August	2Mid	S	6	2	602S	12	0	0
2018	2018-08-08	July/August	2Mid	S	6	3	603S	4	9	8
2018	2018-08-08	July/August	2Mid	S	6	3	603S	7	18	1
2018	2018-08-08	July/August	2Mid	S	6	3	603S	12	0	1
2018	2018-08-08	July/August	2Mid	S	6	4	604S	4	1	0
2018	2018-08-08	July/August	2Mid	S	6	4	604S	7	0	0
2018	2018-08-08	July/August	2Mid	S	6	4	604S	12	0	0
2018	2018-08-08	July/August	2Mid	S	6	5	605S	4	12	2
2018	2018-08-08	July/August	2Mid	S	6	5	605S	7	0	1
2018	2018-08-08	July/August	2Mid	S	6	5	605S	12	0	13
2018	2018-08-08	July/August	2Mid	S	6	6	606S	4	17	16
2018	2018-08-08	July/August	2Mid	S	6	6	606S	7	1	0
2018	2018-08-08	July/August	2Mid	S	6	6	606S	12	0	6
2019	2019-07-17	July	2Mid	S	1	1	101S	4	0	10
2019	2019-07-17	July	2Mid	S	1	1	101S	7	7	12
2019	2019-07-17	July	2Mid	S	1	1	101S	12	3	3
2019	2019-07-17	July	2Mid	S	1	2	102S	4	3	16
2019	2019-07-17	July	2Mid	S	1	2	102S	7	25	17
2019	2019-07-17	July	2Mid	S	1	2	102S	12	0	16
2019	2019-07-17	July	2Mid	S	1	3	103S	4	18	18
2019	2019-07-17	July	2Mid	S	1	3	103S	7	0	1
2019	2019-07-17	July	2Mid	S	1	3	103S	12	1	8
2019	2019-07-17	July	2Mid	S	1	4	104S	4			open
2019	2019-07-17	July	2Mid	S	1	4	104S	7			open
2019	2019-07-17	July	2Mid	S	1	4	104S	12	0	2
2019	2019-07-17	July	2Mid	S	1	5	105S	4	5	9
2019	2019-07-17	July	2Mid	S	1	5	105S	7	16	15
2019	2019-07-17	July	2Mid	S	1	5	105S	12	30	18
2019	2019-07-17	July	2Mid	S	1	6	106S	4	10	20
2019	2019-07-17	July	2Mid	S	1	6	106S	7	26	19
2019	2019-07-17	July	2Mid	S	1	6	106S	12	0	6
2019	2019-07-17	July	2Mid	S	2	1	201S	4	28	19
2019	2019-07-17	July	2Mid	S	2	1	201S	7			open
2019	2019-07-17	July	2Mid	S	2	1	201S	12	21	10
2019	2019-07-17	July	2Mid	S	2	2	202S	4	22	17
2019	2019-07-17	July	2Mid	S	2	2	202S	7	0	2
2019	2019-07-17	July	2Mid	S	2	2	202S	12	29	20
2019	2019-07-17	July	2Mid	S	2	3	203S	4	0	13
2019	2019-07-17	July	2Mid	S	2	3	203S	7	18	17
2019	2019-07-17	July	2Mid	S	2	3	203S	12	20	20
2019	2019-07-17	July	2Mid	S	2	4	204S	4	0	17
2019	2019-07-17	July	2Mid	S	2	4	204S	7
2019	2019-07-17	July	2Mid	S	2	4	204S	12	24	16
2019	2019-07-17	July	2Mid	S	2	5	205S	4	12	12
2019	2019-07-17	July	2Mid	S	2	5	205S	7
2019	2019-07-17	July	2Mid	S	2	5	205S	12	21	17
2019	2019-07-17	July	2Mid	S	2	6	206S	4	21	18
2019	2019-07-17	July	2Mid	S	2	6	206S	7
2019	2019-07-17	July	2Mid	S	2	6	206S	12	0	0
2019	2019-07-17	July	2Mid	S	3	1	301S	4	29	20
2019	2019-07-17	July	2Mid	S	3	1	301S	7	30	20
2019	2019-07-17	July	2Mid	S	3	1	301S	12	23	20
2019	2019-07-17	July	2Mid	S	3	2	302S	4			open
2019	2019-07-17	July	2Mid	S	3	2	302S	7	29	18
2019	2019-07-17	July	2Mid	S	3	2	302S	12	26	17
2019	2019-07-17	July	2Mid	S	3	3	303S	4	1	9
2019	2019-07-17	July	2Mid	S	3	3	303S	7	16	18
2019	2019-07-17	July	2Mid	S	3	3	303S	12	22	20
2019	2019-07-17	July	2Mid	S	3	4	304S	4	0	0
2019	2019-07-17	July	2Mid	S	3	4	304S	7	26	20
2019	2019-07-17	July	2Mid	S	3	4	304S	12	17	19
2019	2019-07-17	July	2Mid	S	3	5	305S	4	23	20
2019	2019-07-17	July	2Mid	S	3	5	305S	7	16	19
2019	2019-07-17	July	2Mid	S	3	5	305S	12	23	18
2019	2019-07-17	July	2Mid	S	3	6	306S	4	19	12
2019	2019-07-17	July	2Mid	S	3	6	306S	7	7	18
2019	2019-07-17	July	2Mid	S	3	6	306S	12	7	12
2019	2019-07-17	July	2Mid	S	4	1	401S	4	29	16
2019	2019-07-17	July	2Mid	S	4	1	401S	7	21	18
2019	2019-07-17	July	2Mid	S	4	1	401S	12			outside cage
2019	2019-07-17	July	2Mid	S	4	2	402S	4	30	18
2019	2019-07-17	July	2Mid	S	4	2	402S	7	1	16
2019	2019-07-17	July	2Mid	S	4	2	402S	12	19	18
2019	2019-07-17	July	2Mid	S	4	3	403S	4	28	16
2019	2019-07-17	July	2Mid	S	4	3	403S	7	21	17
2019	2019-07-17	July	2Mid	S	4	3	403S	12	25	19
2019	2019-07-17	July	2Mid	S	4	4	404S	4	11	16
2019	2019-07-17	July	2Mid	S	4	4	404S	7	24	19
2019	2019-07-17	July	2Mid	S	4	4	404S	12	20	16
2019	2019-07-17	July	2Mid	S	4	5	405S	4	8	11
2019	2019-07-17	July	2Mid	S	4	5	405S	7	14	11
2019	2019-07-17	July	2Mid	S	4	5	405S	12	21	17
2019	2019-07-17	July	2Mid	S	4	6	406S	4	28	16
2019	2019-07-17	July	2Mid	S	4	6	406S	7	28	19
2019	2019-07-17	July	2Mid	S	4	6	406S	12	19	16
2019	2019-07-17	July	2Mid	S	5	1	501S	4	30	20
2019	2019-07-17	July	2Mid	S	5	1	501S	7	27	16
2019	2019-07-17	July	2Mid	S	5	1	501S	12	27	16
2019	2019-07-17	July	2Mid	S	5	2	502S	4	29	20
2019	2019-07-17	July	2Mid	S	5	2	502S	7	30	15
2019	2019-07-17	July	2Mid	S	5	2	502S	12	26	17
2019	2019-07-17	July	2Mid	S	5	3	503S	4	30	18
2019	2019-07-17	July	2Mid	S	5	3	503S	7	14	4
2019	2019-07-17	July	2Mid	S	5	3	503S	12	19	12
2019	2019-07-17	July	2Mid	S	5	4	504S	4	30	16
2019	2019-07-17	July	2Mid	S	5	4	504S	7	26	15
2019	2019-07-17	July	2Mid	S	5	4	504S	12	18	15
2019	2019-07-17	July	2Mid	S	5	5	505S	4	27	20
2019	2019-07-17	July	2Mid	S	5	5	505S	7	24	17
2019	2019-07-17	July	2Mid	S	5	5	505S	12	19	16
2019	2019-07-17	July	2Mid	S	5	6	506S	4	27	20
2019	2019-07-17	July	2Mid	S	5	6	506S	7	20	14
2019	2019-07-17	July	2Mid	S	5	6	506S	12	22	10
2019	2019-07-17	July	2Mid	S	6	1	601S	4	29	16
2019	2019-07-17	July	2Mid	S	6	1	601S	7	30	17
2019	2019-07-17	July	2Mid	S	6	1	601S	12	28	20
2019	2019-07-17	July	2Mid	S	6	2	602S	4	28	17
2019	2019-07-17	July	2Mid	S	6	2	602S	7	35	20
2019	2019-07-17	July	2Mid	S	6	2	602S	12			outside cage
2019	2019-07-17	July	2Mid	S	6	3	603S	4	29	17
2019	2019-07-17	July	2Mid	S	6	3	603S	7	23	20
2019	2019-07-17	July	2Mid	S	6	3	603S	12	27	19
2019	2019-07-17	July	2Mid	S	6	4	604S	4	30	20
2019	2019-07-17	July	2Mid	S	6	4	604S	7	26	15
2019	2019-07-17	July	2Mid	S	6	4	604S	12	27	18
2019	2019-07-17	July	2Mid	S	6	5	605S	4	0	12
2019	2019-07-17	July	2Mid	S	6	5	605S	7	25	17
2019	2019-07-17	July	2Mid	S	6	5	605S	12	15	15
2019	2019-07-17	July	2Mid	S	6	6	606S	4	1	12
2019	2019-07-17	July	2Mid	S	6	6	606S	7	27	14
2019	2019-07-17	July	2Mid	S	6	6	606S	12	23	19
2019	2019-07-25	July	2Mid	N	1	1	101N	4	18	17
2019	2019-07-25	July	2Mid	N	1	1	101N	7	25	11
2019	2019-07-25	July	2Mid	N	1	1	101N	12	29	15
2019	2019-07-25	July	2Mid	N	1	2	102N	4	30	18
2019	2019-07-25	July	2Mid	N	1	2	102N	7	30	20
2019	2019-07-25	July	2Mid	N	1	2	102N	12	29	19
2019	2019-07-25	July	2Mid	N	1	3	103N	4	25	15
2019	2019-07-25	July	2Mid	N	1	3	103N	7	21	16
2019	2019-07-25	July	2Mid	N	1	3	103N	12	29	19
2019	2019-07-25	July	2Mid	N	1	4	104N	4	30	16
2019	2019-07-25	July	2Mid	N	1	4	104N	7	22	9
2019	2019-07-25	July	2Mid	N	1	4	104N	12	29	19
2019	2019-07-25	July	2Mid	N	1	5	105N	4	23	17
2019	2019-07-25	July	2Mid	N	1	5	105N	7	28	19
2019	2019-07-25	July	2Mid	N	1	5	105N	12	29	18
2019	2019-07-25	July	2Mid	N	1	6	106N	4	28	17
2019	2019-07-25	July	2Mid	N	1	6	106N	7	25	16
2019	2019-07-25	July	2Mid	N	1	6	106N	12	28	19
2019	2019-07-25	July	2Mid	N	2	1	201N	4	30	20
2019	2019-07-25	July	2Mid	N	2	1	201N	7	30	11
2019	2019-07-25	July	2Mid	N	2	1	201N	12	30	7
2019	2019-07-25	July	2Mid	N	2	2	202N	4	26	8
2019	2019-07-25	July	2Mid	N	2	2	202N	7	28	16
2019	2019-07-25	July	2Mid	N	2	2	202N	12	29	16
2019	2019-07-25	July	2Mid	N	2	3	203N	4	30	9
2019	2019-07-25	July	2Mid	N	2	3	203N	7	27	12
2019	2019-07-25	July	2Mid	N	2	3	203N	12	27	11
2019	2019-07-25	July	2Mid	N	2	4	204N	4	30	15
2019	2019-07-25	July	2Mid	N	2	4	204N	7	24	13
2019	2019-07-25	July	2Mid	N	2	4	204N	12	28	20
2019	2019-07-25	July	2Mid	N	2	5	205N	4	15	7
2019	2019-07-25	July	2Mid	N	2	5	205N	7	29	20
2019	2019-07-25	July	2Mid	N	2	5	205N	12	26	17
2019	2019-07-25	July	2Mid	N	2	6	206N	4	2	0
2019	2019-07-25	July	2Mid	N	2	6	206N	7	29	17
2019	2019-07-25	July	2Mid	N	2	6	206N	12	30	19
2019	2019-07-25	July	2Mid	N	3	1	301N	4	16	11
2019	2019-07-25	July	2Mid	N	3	1	301N	7	28	14
2019	2019-07-25	July	2Mid	N	3	1	301N	12	30	15
2019	2019-07-25	July	2Mid	N	3	2	302N	4	28	4
2019	2019-07-25	July	2Mid	N	3	2	302N	7	29	19
2019	2019-07-25	July	2Mid	N	3	2	302N	12	30	18
2019	2019-07-25	July	2Mid	N	3	3	303N	4	25	15
2019	2019-07-25	July	2Mid	N	3	3	303N	7	28	12
2019	2019-07-25	July	2Mid	N	3	3	303N	12	25	16
2019	2019-07-25	July	2Mid	N	3	4	304N	4	29	15
2019	2019-07-25	July	2Mid	N	3	4	304N	7	27	20
2019	2019-07-25	July	2Mid	N	3	4	304N	12	28	17
2019	2019-07-25	July	2Mid	N	3	5	305N	4	30	18
2019	2019-07-25	July	2Mid	N	3	5	305N	7	26	17
2019	2019-07-25	July	2Mid	N	3	5	305N	12	28	20
2019	2019-07-25	July	2Mid	N	3	6	306N	4	25	12
2019	2019-07-25	July	2Mid	N	3	6	306N	7	23	11
2019	2019-07-25	July	2Mid	N	3	6	306N	12	29	18
2019	2019-07-25	July	2Mid	N	4	1	401N	4	29	20
2019	2019-07-25	July	2Mid	N	4	1	401N	7	30	17
2019	2019-07-25	July	2Mid	N	4	1	401N	12	30	20
2019	2019-07-25	July	2Mid	N	4	2	402N	4	23	19
2019	2019-07-25	July	2Mid	N	4	2	402N	7	21	19
2019	2019-07-25	July	2Mid	N	4	2	402N	12	27	16
2019	2019-07-25	July	2Mid	N	4	3	403N	4	21	14
2019	2019-07-25	July	2Mid	N	4	3	403N	7	30	16
2019	2019-07-25	July	2Mid	N	4	3	403N	12	30	17
2019	2019-07-25	July	2Mid	N	4	4	404N	4	27	20
2019	2019-07-25	July	2Mid	N	4	4	404N	7	29	17
2019	2019-07-25	July	2Mid	N	4	4	404N	12	30	18
2019	2019-07-25	July	2Mid	N	4	5	405N	7	30	20
2019	2019-07-25	July	2Mid	N	4	5	405N	12	31	17
2019	2019-07-25	July	2Mid	N	4	5	405N
2019	2019-07-25	July	2Mid	N	4	6	406N	4	27	19
2019	2019-07-25	July	2Mid	N	4	6	406N	7	28	14
2019	2019-07-25	July	2Mid	N	4	6	406N	12	30	16
2019	2019-07-25	July	2Mid	N	5	1	501N	4	25	20
2019	2019-07-25	July	2Mid	N	5	1	501N	7	30	19
2019	2019-07-25	July	2Mid	N	5	1	501N	12	27	16
2019	2019-07-25	July	2Mid	N	5	2	502N	4	30	13
2019	2019-07-25	July	2Mid	N	5	2	502N	7	27	17
2019	2019-07-25	July	2Mid	N	5	2	502N	12	28	15
2019	2019-07-25	July	2Mid	N	5	3	503N	4	30	17
2019	2019-07-25	July	2Mid	N	5	3	503N	7	28	15
2019	2019-07-25	July	2Mid	N	5	3	503N	12	30	10
2019	2019-07-25	July	2Mid	N	5	4	504N	4	27	18
2019	2019-07-25	July	2Mid	N	5	4	504N	7	28	19
2019	2019-07-25	July	2Mid	N	5	4	504N	12	30	16
2019	2019-07-25	July	2Mid	N	5	5	505N	4	30	19
2019	2019-07-25	July	2Mid	N	5	5	505N	7	26	13
2019	2019-07-25	July	2Mid	N	5	5	505N	12	28	13
2019	2019-07-25	July	2Mid	N	5	6	506N	4	28	18
2019	2019-07-25	July	2Mid	N	5	6	506N	7	28	19
2019	2019-07-25	July	2Mid	N	5	6	506N	12	30	19
2019	2019-07-25	July	2Mid	N	6	1	601N	4	30	20
2019	2019-07-25	July	2Mid	N	6	1	601N	7	25	16
2019	2019-07-25	July	2Mid	N	6	1	601N	12	28	14
2019	2019-07-25	July	2Mid	N	6	2	602N	4	23	15
2019	2019-07-25	July	2Mid	N	6	2	602N	7	30	18
2019	2019-07-25	July	2Mid	N	6	2	602N	12	29	18
2019	2019-07-25	July	2Mid	N	6	3	603N	4	22	9
2019	2019-07-25	July	2Mid	N	6	3	603N	7	12	2
2019	2019-07-25	July	2Mid	N	6	3	603N	12	24	20
2019	2019-07-25	July	2Mid	N	6	4	604N	4	30	20
2019	2019-07-25	July	2Mid	N	6	4	604N	7	28	13
2019	2019-07-25	July	2Mid	N	6	4	604N	12	28	20
2019	2019-07-25	July	2Mid	N	6	5	605N	4	15	11
2019	2019-07-25	July	2Mid	N	6	5	605N	7	29	20
2019	2019-07-25	July	2Mid	N	6	5	605N	12	28	20
2019	2019-07-25	July	2Mid	N	6	6	606N	4	27	19
2019	2019-07-25	July	2Mid	N	6	6	606N	7	29	20
2019	2019-07-25	July	2Mid	N	6	6	606N	12	24	12

## Sheet: META DATA
Date Collected	y2017 & 2018
Date Entered
Data entered by:	Elizabeth
Data Collected by (who collected what data):	From the other data sheets from this year
Header explainations:
Field	North or South Field; south field in 2017 was corn, north field in 2017 was soy
Block	1-6, Refers to the plot replicatees that run east-west; lenghtwise 110ft
Plot_ID	unique plot identifier, includes field, block and plot: X0Y; X=block, Y=plot
row	Row within the plot where sentinel seeds are located. Sampled rows 4, 7, and 12
PW	Pigweed seeds; 30 placed on each card
FT	Foxtail seeds; 20 placed on each card
Data edits
Date:	2021-09-22
Data edited by:	Elizabeth
Edits made:	Added 2019 data
